# Supplementary material
Source: publisher figshare collection journal article supplement (https://acs.figshare.com/ndownloader/files/8932777)
Supplement: Supplementary file 1 [file 8932777]

90
10 Molecule Name
P      -2.296900    0.276800   -0.234800
P       1.694100   -0.976300   -0.240600
O      -0.360300   -0.579500    1.669500
C      -2.678800   -0.281000    1.467600
C      -3.974300   -0.395800    1.983100
H      -4.820500   -0.102800    1.372100
C      -4.183100   -0.878400    3.275300
H      -5.190400   -0.955300    3.667400
C      -3.094300   -1.268300    4.056500
H      -3.253700   -1.660900    5.054400
C      -1.794600   -1.164300    3.562300
H      -0.947900   -1.479200    4.159100
C      -1.601500   -0.652800    2.281000
C       0.834900   -0.229200    2.297200
C       1.970700   -0.520600    1.527700
C       3.221700   -0.245600    2.091200
H       4.120000   -0.457400    1.524000
C       3.324300    0.331600    3.358700
H       4.302500    0.532800    3.780800
C       2.171700    0.682100    4.061000
H       2.245800    1.182200    5.019800
C       0.910200    0.406800    3.531000
H       0.013200    0.725600    4.044900
C      -3.865700    1.085600   -0.751700
C      -4.027600    2.446300   -0.439600
H      -3.238100    2.977200    0.084200
C      -5.203000    3.111200   -0.788000
H      -5.320000    4.160200   -0.539200
C      -6.222900    2.430300   -1.456000
H      -7.134600    2.950200   -1.729800
C      -6.067800    1.079300   -1.770700
H      -6.858400    0.546900   -2.288500
C      -4.896100    0.407200   -1.419100
H      -4.783200   -0.643100   -1.665500
C      -2.298000   -1.288300   -1.199900
C      -2.024900   -1.210100   -2.574800
H      -1.797700   -0.249500   -3.028100
C      -2.068500   -2.351400   -3.373200
H      -1.866500   -2.273800   -4.436000
C      -2.373100   -3.589200   -2.803300
H      -2.403100   -4.479800   -3.421700
C      -2.623200   -3.679900   -1.434800
H      -2.833500   -4.642000   -0.982200
C      -2.587200   -2.537000   -0.634900
H      -2.782100   -2.622800    0.427500
C       1.137300   -2.734900   -0.161800
C       0.877300   -3.429900    1.026400
H       1.017200   -2.936100    1.981300
C       0.451200   -4.759200    0.992300
H       0.253000   -5.282600    1.921900
C       0.297100   -5.417300   -0.228300
H      -0.022400   -6.453800   -0.252800
C       0.555400   -4.734100   -1.418100
H       0.428200   -5.233500   -2.372600
C       0.957700   -3.400700   -1.385100
H       1.134700   -2.872400   -2.317400
C       3.443800   -1.188500   -0.798200
C       4.171400   -2.382900   -0.680800
H       3.697900   -3.264700   -0.263200
C       5.502100   -2.443200   -1.096500
H       6.052300   -3.373700   -1.002900
C       6.127100   -1.310200   -1.623200
H       7.163400   -1.359800   -1.940600
C       5.414500   -0.115800   -1.737500
H       5.889400    0.773800   -2.136800
C       4.079700   -0.058700   -1.335500
H       3.535500    0.875700   -1.423500
C       0.377200    2.089700   -2.387200
C       0.636800    3.009300   -1.219100
H       1.267000    1.570500   -2.747300
C      -0.771000    2.538400    1.168500
N      -0.951000    3.018400    2.230800
Ni     -0.571700    1.725100   -0.478000
H      -0.177300    2.551000   -3.208100
C       2.074400    3.077100   -0.765500
C       2.478200    2.843100    0.554800
C       3.054000    3.444500   -1.707200
C       3.822900    2.958400    0.915900
H       1.739000    2.564500    1.296300
C       4.396000    3.559700   -1.347000
H       2.755900    3.644300   -2.733200
C       4.785600    3.311400   -0.028900
H       4.111500    2.761800    1.942000
H       5.133200    3.845400   -2.090500
H       5.828500    3.395800    0.257400
C      -0.020400    4.385700   -1.308000
H       0.024000    4.885100   -0.337300
H       0.497500    5.018100   -2.044900
H      -1.073600    4.306400   -1.601100
H      -0.304700    1.187700   -2.084500
90
11 Molecule Name
P      -2.155500    0.637300    0.308100
P       1.033500   -0.901100   -0.162400
O      -1.006500   -0.610900   -2.249300
C      -2.855900    0.740800   -1.407100
C      -3.998100    1.493500   -1.717500
H      -4.532300    1.995800   -0.919400
C      -4.445300    1.624900   -3.033600
H      -5.329100    2.216800   -3.242800
C      -3.751000    1.008900   -4.074000
H      -4.086700    1.119100   -5.098900
C      -2.614300    0.251100   -3.792400
H      -2.044500   -0.232000   -4.577100
C      -2.187800    0.119300   -2.475900
C      -1.079200   -1.904400   -1.702000
C      -0.113500   -2.238400   -0.743700
C      -0.168300   -3.530400   -0.205400
H       0.536900   -3.819500    0.563600
C      -1.142600   -4.442500   -0.610800
H      -1.172900   -5.429500   -0.164100
C      -2.082900   -4.079200   -1.573900
H      -2.845500   -4.783000   -1.887400
C      -2.050800   -2.802400   -2.129200
H      -2.781800   -2.495900   -2.868300
C      -2.845900   -0.967500    0.910100
C      -2.202200   -1.597700    1.983400
H      -1.295500   -1.166100    2.391800
C      -2.704700   -2.782500    2.520500
H      -2.189900   -3.258300    3.348200
C      -3.858100   -3.357200    1.985400
H      -4.248700   -4.280800    2.398900
C      -4.504200   -2.742600    0.911500
H      -5.397400   -3.188200    0.486500
C      -4.002500   -1.555500    0.377800
H      -4.508400   -1.087200   -0.460200
C      -3.210700    1.846100    1.223300
C      -4.410100    1.497500    1.864700
H      -4.752900    0.469100    1.861600
C      -5.170100    2.468900    2.517800
H      -6.092900    2.185300    3.012900
C      -4.744200    3.798100    2.536000
H      -5.336500    4.551800    3.044500
C      -3.550100    4.151000    1.905400
H      -3.207200    5.180000    1.924400
C      -2.780900    3.184000    1.256500
H      -1.838600    3.452800    0.789700
C       2.408600   -1.032300   -1.391800
C       2.113600   -1.160600   -2.759400
H       1.085100   -1.248200   -3.087400
C       3.133800   -1.142200   -3.709400
H       2.887700   -1.241400   -4.761300
C       4.464400   -0.993400   -3.312600
H       5.256100   -0.976500   -4.053800
C       4.766000   -0.860100   -1.958100
H       5.792000   -0.726800   -1.633300
C       3.747800   -0.876700   -1.004000
H       4.004600   -0.749000    0.041200
C       1.764300   -1.633600    1.363800
C       2.657000   -2.717200    1.364500
H       2.962300   -3.163900    0.424000
C       3.169600   -3.212900    2.563200
H       3.864800   -4.045400    2.548200
C       2.793100   -2.637500    3.779200
H       3.193500   -3.025000    4.709900
C       1.907500   -1.558900    3.792200
H       1.618300   -1.100200    4.731600
C       1.404500   -1.057600    2.590700
H       0.743200   -0.195300    2.593800
C       2.796200    2.612000   -1.992900
C       2.658800    2.898100   -0.476000
H       2.754000    1.539400   -2.194200
C       1.266500    2.474400   -0.093000
N       0.170400    2.990900    0.126100
Ni      0.041500    1.026600    0.126900
H       1.976900    3.100200   -2.529500
H       3.739200    3.008800   -2.381100
C       3.719500    2.155100    0.341300
C       3.403000    1.538400    1.556600
C       5.052600    2.118600   -0.091100
C       4.376100    0.866100    2.298800
H       2.379100    1.561700    1.911300
C       6.030200    1.457000    0.650500
H       5.333400    2.595100   -1.023800
C       5.694100    0.816300    1.845300
H       4.096200    0.369600    3.221700
H       7.054200    1.436000    0.291200
H       6.451000    0.290100    2.416900
C       2.803700    4.418800   -0.217500
H       2.659900    4.641100    0.843800
H       3.802900    4.756300   -0.513500
H       2.053700    4.971100   -0.791600
90
12 Molecule Name
P      -2.144800    0.292600   -0.078300
P       1.533900   -0.701600    0.014400
O      -0.659200   -2.144900   -1.111600
C      -2.755500   -0.933900   -1.319700
C      -4.002500   -0.836800   -1.957400
H      -4.665300   -0.016500   -1.705700
C      -4.395500   -1.765200   -2.921800
H      -5.362900   -1.664900   -3.400500
C      -3.542600   -2.812100   -3.274200
H      -3.840200   -3.529700   -4.030100
C      -2.303400   -2.937700   -2.648300
H      -1.614300   -3.735200   -2.898200
C      -1.929800   -2.011700   -1.679500
C      -0.515300   -2.553700    0.224300
C       0.582200   -2.010200    0.904200
C       0.803400   -2.435700    2.219100
H       1.645500   -2.037600    2.773100
C      -0.062400   -3.343900    2.832000
H       0.116800   -3.648000    3.857000
C      -1.161900   -3.844700    2.135700
H      -1.846800   -4.533300    2.616700
C      -1.390000   -3.457000    0.815600
H      -2.240600   -3.836400    0.261500
C      -2.763400   -0.414100    1.501700
C      -1.973200   -0.315900    2.653200
H      -1.015700    0.186300    2.608400
C      -2.420900   -0.855600    3.860300
H      -1.798300   -0.774000    4.743900
C      -3.655000   -1.499700    3.926200
H      -3.999700   -1.922000    4.864100
C      -4.450400   -1.599600    2.781100
H      -5.412900   -2.097500    2.828000
C      -4.008700   -1.058800    1.576300
H      -4.628900   -1.148600    0.690700
C      -3.223100    1.750600   -0.372400
C      -3.843300    2.416900    0.691300
H      -3.786000    2.009400    1.693800
C      -4.511600    3.622800    0.471300
H      -4.978300    4.133700    1.305900
C      -4.569900    4.173600   -0.808400
H      -5.085900    5.112900   -0.974100
C      -3.952900    3.515600   -1.875700
H      -3.991800    3.940200   -2.873200
C      -3.277900    2.316600   -1.658100
H      -2.793300    1.815700   -2.491200
C       2.363700   -1.743200   -1.263700
C       2.945400   -2.982000   -0.950800
H       2.922200   -3.342500    0.072700
C       3.546000   -3.754600   -1.943600
H       3.994000   -4.708700   -1.687500
C       3.566900   -3.303400   -3.265900
H       4.033700   -3.905400   -4.038200
C       2.977900   -2.081600   -3.590600
H       2.979500   -1.731200   -4.617200
C       2.378300   -1.310300   -2.593800
H       1.902900   -0.372400   -2.851200
C       2.883300   -0.329200    1.213000
C       4.225000   -0.678200    1.011000
H       4.522000   -1.202900    0.111100
C       5.195600   -0.338500    1.955300
H       6.231100   -0.610000    1.778900
C       4.840600    0.351400    3.113400
H       5.596400    0.611800    3.846900
C       3.509200    0.720200    3.316700
H       3.223300    1.278500    4.201400
C       2.540500    0.393300    2.370100
H       1.520600    0.730400    2.518900
C       0.387000    1.980300   -2.345600
C       0.966000    2.673500   -1.136500
C      -0.182300    2.198200    1.303200
N      -0.267400    2.809800    2.309600
Ni     -0.048300    1.235100   -0.281600
H      -0.395700    2.573500   -2.821100
H       1.113900    1.663100   -3.094200
C       2.440600    2.562200   -0.873700
C       2.954700    3.035100    0.349000
C       3.351600    2.012700   -1.789800
C       4.313400    2.962100    0.636500
H       2.269100    3.414100    1.098400
C       4.714600    1.930600   -1.498700
H       3.015600    1.651500   -2.754500
C       5.203800    2.407900   -0.285500
H       4.674600    3.313700    1.596600
H       5.390500    1.495200   -2.227500
H       6.260800    2.337300   -0.053500
C       0.386600    4.072000   -0.921900
H       0.640000    4.473400    0.059300
H       0.779300    4.758600   -1.686600
H      -0.705400    4.051500   -0.994000
H      -0.117400    0.978600   -2.069700
102
13 Molecule Name
P       2.303500    0.623900   -0.011800
P      -1.205000   -1.476600   -0.101600
O       1.309500   -1.995300    1.346600
C       3.107500   -0.345700    1.342900
C       4.346100    0.041300    1.880200
H       4.838900    0.925400    1.492100
C       4.952000   -0.679200    2.907500
H       5.905200   -0.351200    3.305500
C       4.326800   -1.814800    3.424500
H       4.784600   -2.372000    4.233700
C       3.113900   -2.239600    2.887800
H       2.606800   -3.122800    3.256900
C       2.528300   -1.520500    1.848400
C       1.274700   -2.774800    0.187200
C       0.075400   -2.731400   -0.544200
C      -0.010400   -3.527000   -1.694000
H      -0.917500   -3.508800   -2.285900
C       1.062800   -4.321300   -2.103300
H       0.975200   -4.919400   -3.002800
C       2.242900   -4.334300   -1.361200
H       3.083700   -4.939700   -1.680100
C       2.352000   -3.563300   -0.204300
H       3.268100   -3.560100    0.373800
C       3.380300    0.138300   -1.424100
C       2.954100   -0.883600   -2.282300
H       1.963600   -1.308000   -2.171300
C       3.790000   -1.341400   -3.300600
H       3.443500   -2.129100   -3.959900
C       5.052500   -0.776300   -3.478700
H       5.698000   -1.126100   -4.277200
C       5.481200    0.250100   -2.633600
H       6.457800    0.700400   -2.774600
C       4.651800    0.702900   -1.609100
H       4.989200    1.507600   -0.963900
C       2.738600    2.376200    0.298100
C       2.632000    3.245900   -0.801600
H       2.408400    2.847000   -1.786500
C       2.784900    4.619100   -0.628700
H       2.696400    5.279800   -1.483800
C       3.038900    5.143800    0.641100
H       3.154000    6.213700    0.774400
C       3.135000    4.288300    1.737800
H       3.319700    4.690500    2.727900
C       2.980800    2.910600    1.570400
H       3.034400    2.261000    2.436700
C      -1.900400   -2.035900    1.502600
C      -1.509700   -3.210800    2.155100
H      -0.764300   -3.858800    1.708400
C      -2.075800   -3.554900    3.384500
H      -1.765200   -4.467800    3.881200
C      -3.036500   -2.731200    3.972200
H      -3.472200   -2.999500    4.928500
C      -3.435300   -1.559900    3.324300
H      -4.180600   -0.911700    3.772800
C      -2.870100   -1.214100    2.098900
H      -3.188800   -0.308000    1.595700
C      -2.577000   -1.878400   -1.266900
C      -3.611700   -2.760000   -0.914100
H      -3.617200   -3.229700    0.062600
C      -4.647300   -3.029500   -1.808600
H      -5.443100   -3.707200   -1.518700
C      -4.660900   -2.430100   -3.069500
H      -5.469700   -2.636900   -3.762000
C      -3.628000   -1.566100   -3.435500
H      -3.626000   -1.096400   -4.412600
C      -2.592000   -1.289700   -2.541900
H      -1.799700   -0.612800   -2.839800
C       0.134000    0.598900   -2.104000
N       0.093900    0.909700   -3.242600
Ni      0.140000    0.357500   -0.207800
C       0.008500    0.716100    1.716500
H       0.923000    1.108300    2.185500
H      -0.283500   -0.170700    2.284800
C      -1.073200    1.810300    1.751900
H      -1.962100    1.450200    1.212400
C      -1.494100    2.099200    3.205000
H      -2.244400    2.899300    3.245300
H      -1.909600    1.202200    3.679000
H      -0.625100    2.422900    3.792300
C      -0.614100    3.104300    1.059000
H      -0.292700    2.919000    0.028100
H      -1.431000    3.833000    1.019100
H       0.230200    3.551100    1.598200
C      -4.721100    1.517800    0.284900
C      -5.070000    0.378700   -0.333300
H      -4.855600    0.198300   -1.381100
H      -5.590400   -0.413800    0.195400
C      -5.077100    1.758800    1.734900
H      -4.188900    2.029300    2.317800
H      -5.798300    2.577900    1.842400
H      -5.527800    0.865300    2.177300
C      -3.962800    2.587300   -0.424400
C      -4.175400    3.944600   -0.136800
C      -3.002900    2.256300   -1.395200
C      -3.474200    4.937600   -0.822400
H      -4.903100    4.233300    0.614300
C      -2.299300    3.245300   -2.079400
H      -2.780200    1.213800   -1.593400
C      -2.538000    4.591800   -1.798000
H      -3.660300    5.981800   -0.593200
H      -1.551000    2.950700   -2.807000
H      -1.988600    5.364300   -2.325200
102
14 Molecule Name
P      -0.489800   -1.871800   -0.030400
P      -1.144800    1.609400   -0.078100
O       0.339700    0.294400    2.031200
C       0.620200   -2.050300    1.449900
C       1.278100   -3.258700    1.733500
H       1.061900   -4.135200    1.136000
C       2.230700   -3.348600    2.749200
H       2.723200   -4.295800    2.936100
C       2.559800   -2.223900    3.505100
H       3.313500   -2.283700    4.281700
C       1.909200   -1.016100    3.258200
H       2.137600   -0.119000    3.819600
C       0.949700   -0.949900    2.255000
C      -0.989400    0.469200    2.457400
C      -1.838600    1.132700    1.568300
C      -3.177100    1.284800    1.955200
H      -3.884900    1.742200    1.276600
C      -3.623900    0.822200    3.192900
H      -4.666600    0.941700    3.462800
C      -2.738000    0.200200    4.072100
H      -3.083500   -0.156200    5.035900
C      -1.407900    0.015800    3.703100
H      -0.708400   -0.488300    4.359600
C      -2.198100   -2.077700    0.605100
C      -3.235200   -1.681600   -0.254000
H      -2.995600   -1.270200   -1.229200
C      -4.565300   -1.821200    0.136300
H      -5.357100   -1.509500   -0.535600
C      -4.872200   -2.355700    1.389400
H      -5.907300   -2.461300    1.696000
C      -3.846200   -2.755600    2.246400
H      -4.081100   -3.170600    3.220600
C      -2.512800   -2.620800    1.856000
H      -1.718500   -2.930500    2.527100
C      -0.164700   -3.467100   -0.875700
C      -0.976100   -4.597500   -0.719700
H      -1.871000   -4.548900   -0.109100
C      -0.639500   -5.792900   -1.358700
H      -1.278200   -6.661900   -1.243200
C       0.509300   -5.867000   -2.147100
H       0.765200   -6.795700   -2.645900
C       1.319600   -4.740600   -2.305700
H       2.203200   -4.783900   -2.932300
C       0.980600   -3.544000   -1.681100
H       1.592600   -2.663500   -1.834800
C      -0.236900    3.180200    0.278600
C       0.589200    3.301600    1.407500
H       0.660600    2.490600    2.120100
C       1.350700    4.453200    1.607400
H       1.980300    4.531400    2.487400
C       1.316100    5.494000    0.678400
H       1.916700    6.383600    0.832400
C       0.502200    5.382100   -0.448400
H       0.465200    6.183900   -1.177600
C      -0.273000    4.238900   -0.644700
H      -0.909900    4.178300   -1.519300
C      -2.631800    2.211300   -0.982500
C      -3.369300    3.328600   -0.551800
H      -3.045400    3.883500    0.323400
C      -4.505400    3.737300   -1.247800
H      -5.064700    4.601400   -0.906100
C      -4.917000    3.039500   -2.386900
H      -5.800000    3.360200   -2.929000
C      -4.182800    1.941000   -2.832300
H      -4.483500    1.407100   -3.726700
C      -3.043200    1.530700   -2.137100
H      -2.454000    0.698900   -2.511800
C       1.820700    1.741600   -2.025100
C       0.409900    1.432800   -2.563000
H       0.464000    1.067600   -3.590900
H      -0.213300    2.335600   -2.568100
C       2.559800    2.716900   -2.963100
H       3.565600    2.940500   -2.589500
H       2.651600    2.303000   -3.973400
H       2.001300    3.656800   -3.033600
C      -0.391400   -1.039000   -2.918300
N      -0.630500   -1.621700   -3.915700
Ni     -0.237000   -0.000300   -1.372200
C       2.615300    0.467300   -1.765300
C       2.824700    0.038800   -0.447200
C       3.147700   -0.303500   -2.808700
C       3.564800   -1.113100   -0.170700
H       2.419300    0.625600    0.371800
C       3.891300   -1.452300   -2.537600
H       2.969400   -0.012500   -3.838500
C       4.109000   -1.858400   -1.216800
H       3.716700   -1.415000    0.860700
H       4.296500   -2.035200   -3.358300
H       4.685300   -2.753800   -1.009000
H       1.724100    2.246400   -1.056200
C       4.102600    1.731900    2.622700
H       4.336400    1.051600    3.436800
H       3.198900    2.325600    2.722200
C       4.889900    1.825900    1.543900
C       4.594400    2.768900    0.404600
H       4.561000    2.217600   -0.542600
H       3.636300    3.280400    0.533100
H       5.384300    3.526200    0.314400
C       6.125300    0.977500    1.374400
H       6.314500    0.353000    2.252300
H       6.009900    0.320700    0.502600
H       7.009800    1.602000    1.196400
102
15 Molecule Name
P      -2.475700   -0.635000   -0.010000
P       1.068300    1.333700   -0.040300
O      -1.614100    2.214700    0.835100
C      -3.457200    0.622000    0.929300
C      -4.781900    0.383100    1.330800
H      -5.247200   -0.565400    1.089300
C      -5.510400    1.334400    2.042500
H      -6.530000    1.118600    2.340300
C      -4.925500    2.557900    2.372100
H      -5.482000    3.297200    2.936700
C      -3.624300    2.833100    1.959700
H      -3.144900    3.778400    2.184100
C      -2.914600    1.880500    1.232300
C      -1.369900    2.678700   -0.464200
C      -0.078500    2.448600   -0.965100
C       0.201300    2.909300   -2.259300
H       1.177900    2.724500   -2.689200
C      -0.766800    3.574600   -3.014200
H      -0.527000    3.913400   -4.015400
C      -2.038300    3.789100   -2.484800
H      -2.797700    4.294600   -3.070200
C      -2.345600    3.342800   -1.200200
H      -3.335000    3.490700   -0.784900
C      -3.242500   -0.461900   -1.675000
C      -2.566100    0.250700   -2.672300
H      -1.563500    0.617700   -2.491100
C      -3.167100    0.466500   -3.912900
H      -2.627900    1.016700   -4.675600
C      -4.441600   -0.035600   -4.171700
H      -4.903700    0.124000   -5.140100
C      -5.119400   -0.756500   -3.185100
H      -6.106300   -1.159700   -3.384900
C      -4.525200   -0.966000   -1.942600
H      -5.053300   -1.539300   -1.187600
C      -3.080400   -2.263900    0.575600
C      -2.862900   -3.354300   -0.286100
H      -2.455800   -3.186000   -1.278400
C      -3.135600   -4.651900    0.140800
H      -2.960000   -5.484000   -0.531800
C      -3.621600   -4.880400    1.431000
H      -3.828900   -5.892000    1.762300
C      -3.827800   -3.805300    2.294300
H      -4.191800   -3.976700    3.301400
C      -3.554000   -2.502600    1.872600
H      -3.692100   -1.681200    2.566500
C       1.654500    2.290300    1.422800
C       0.969000    3.365500    2.000300
H       0.039600    3.712000    1.569100
C       1.473300    3.991000    3.143700
H       0.933200    4.825300    3.578400
C       2.662600    3.551700    3.723800
H       3.049500    4.039100    4.612100
C       3.356000    2.482900    3.151300
H       4.285400    2.136700    3.590800
C       2.856300    1.859700    2.010800
H       3.411000    1.043400    1.558500
C       2.595600    1.373800   -1.063300
C       3.373500    2.542700   -1.160300
H       3.061000    3.442900   -0.640700
C       4.549100    2.546600   -1.905100
H       5.144200    3.451300   -1.969600
C       4.964800    1.382800   -2.560500
H       5.887300    1.382100   -3.131100
C       4.197400    0.224200   -2.473500
H       4.521400   -0.683800   -2.968000
C       3.017500    0.215900   -1.725100
H       2.424100   -0.687800   -1.659400
C       0.023200   -1.285000   -1.567500
N       0.203100   -1.882400   -2.569400
Ni     -0.293600   -0.510800    0.145800
C      -0.463700   -0.378800    2.080500
H      -1.449100   -0.586500    2.513500
H      -0.109500    0.576000    2.475500
C       0.520300   -1.538900    2.301700
H       1.114200   -1.677500    1.364600
C       1.532100   -1.226500    3.419200
H       2.283900   -2.021600    3.506700
H       2.046200   -0.278500    3.236400
H       1.010600   -1.144500    4.380500
C      -0.181100   -2.880600    2.566600
H      -0.800700   -3.182900    1.717900
H       0.553700   -3.673600    2.747300
H      -0.825600   -2.807400    3.451100
C       3.227100   -3.352500   -0.602400
C       2.390700   -3.802900    0.344300
H       2.577000   -3.638100    1.401100
H       1.493500   -4.356800    0.089400
C       2.998300   -3.658200   -2.064400
H       3.082400   -2.756800   -2.680100
H       3.730100   -4.387700   -2.435200
H       1.996600   -4.059300   -2.225900
C       4.418500   -2.529000   -0.251700
C       5.599700   -2.604700   -1.005000
C       4.373300   -1.620300    0.819000
C       6.700200   -1.804700   -0.696900
H       5.661200   -3.295100   -1.839500
C       5.473500   -0.824800    1.130800
H       3.454500   -1.515600    1.387200
C       6.641400   -0.908900    0.370600
H       7.604000   -1.880900   -1.292400
H       5.417500   -0.128000    1.961500
H       7.493300   -0.280400    0.605800
102
16 Molecule Name
P      -2.184700    0.009400   -0.498200
P       1.351900    0.938600    0.582500
O      -0.862800   -0.053600    2.188800
C      -2.827500   -0.830400    1.019700
C      -4.011300   -1.582300    1.060600
H      -4.600400   -1.695900    0.157800
C      -4.434500   -2.195000    2.241400
H      -5.352000   -2.772400    2.246400
C      -3.680400   -2.067000    3.408900
H      -4.003800   -2.547200    4.325100
C      -2.500500   -1.324400    3.392800
H      -1.879200   -1.224400    4.274600
C      -2.093500   -0.720300    2.208600
C      -0.794300    1.341000    2.330700
C       0.317200    1.947000    1.732700
C       0.460300    3.331400    1.899900
H       1.306300    3.836100    1.449700
C      -0.486700    4.072200    2.607300
H      -0.360700    5.143500    2.713300
C      -1.600200    3.439300    3.159100
H      -2.351100    4.014900    3.688200
C      -1.756000    2.060100    3.030800
H      -2.617900    1.556000    3.451300
C      -2.844900    1.708400   -0.268500
C      -2.051700    2.801800   -0.638300
H      -1.081900    2.634900   -1.090100
C      -2.512100    4.103500   -0.435600
H      -1.885800    4.941300   -0.720300
C      -3.765300    4.322900    0.134400
H      -4.119600    5.335500    0.295000
C      -4.566200    3.237100    0.498300
H      -5.542800    3.403800    0.939800
C      -4.108900    1.936600    0.298600
H      -4.730500    1.097700    0.594200
C      -3.227700   -0.732300   -1.813800
C      -4.073400    0.024900   -2.630800
H      -4.188300    1.088600   -2.457600
C      -4.756400   -0.582900   -3.687600
H      -5.399600    0.016000   -4.322600
C      -4.605400   -1.946700   -3.932200
H      -5.133500   -2.413500   -4.756300
C      -3.761600   -2.710000   -3.119900
H      -3.633300   -3.770100   -3.309700
C      -3.070900   -2.104900   -2.073500
H      -2.402700   -2.698300   -1.454900
C       2.440500   -0.054200    1.692200
C       2.141100   -0.328100    3.033900
H       1.255200    0.095100    3.490300
C       2.982500   -1.143000    3.795000
H       2.739100   -1.342000    4.833200
C       4.133700   -1.692800    3.229100
H       4.785000   -2.324400    3.823600
C       4.440300   -1.425000    1.893000
H       5.330900   -1.843900    1.437300
C       3.601400   -0.614000    1.131000
H       3.861700   -0.400400    0.100800
C       2.516300    2.224500   -0.044500
C       3.690000    2.593000    0.631100
H       3.953700    2.104500    1.562500
C       4.528800    3.576800    0.107800
H       5.437800    3.844700    0.635700
C       4.200300    4.214300   -1.090500
H       4.855900    4.976800   -1.497700
C       3.027500    3.866100   -1.762100
H       2.765000    4.351400   -2.695800
C       2.191200    2.876000   -1.244200
H       1.301300    2.590600   -1.795500
C       1.182100   -1.572700   -2.075800
C       0.779400   -2.339800   -0.850100
H       0.211200   -3.250600   -1.051500
C       0.597800   -2.083300   -3.392400
H       0.761900   -1.357300   -4.191400
H       1.083900   -3.028600   -3.678700
H      -0.480600   -2.250400   -3.309700
C      -0.185600    0.760700   -2.685800
N      -0.292600    1.502400   -3.598100
Ni     -0.014000   -0.315000   -1.178900
C       2.646700   -1.239200   -2.182700
C       3.087000    0.002300   -2.660900
C       3.614700   -2.201900   -1.848600
C       4.447800    0.298600   -2.737200
H       2.350900    0.740800   -2.951400
C       4.977200   -1.915800   -1.942800
H       3.299600   -3.182600   -1.504200
C       5.399400   -0.656000   -2.372000
H       4.759500    1.282600   -3.070600
H       5.706700   -2.673600   -1.675400
H       6.457500   -0.424100   -2.429400
H       1.599400   -2.534400   -0.158300
H       0.054000   -1.740300   -0.162200
C      -0.265000   -3.570000    2.091600
H      -1.347400   -3.663400    2.064100
H       0.135600   -2.619700    2.435100
C       0.537300   -4.570600    1.708800
C       2.041100   -4.448400    1.741800
H       2.469900   -4.625300    0.745900
H       2.359600   -3.459200    2.080800
H       2.478800   -5.198800    2.413200
C       0.000100   -5.887100    1.201800
H      -1.093300   -5.912900    1.219700
H       0.332100   -6.068800    0.170900
H       0.374200   -6.722500    1.807500
83
1 Molecule Name
P       1.884600    0.576800   -0.027200
P      -1.462900   -0.654000   -0.052500
O       0.518100   -1.447900    1.819800
C       2.553000   -0.149200    1.546200
C       3.782500    0.240100    2.100200
H       4.398900    0.958400    1.573600
C       4.222600   -0.266100    3.324400
H       5.176100    0.057900    3.725800
C       3.434200   -1.171500    4.033300
H       3.766500   -1.558200    4.990000
C       2.206200   -1.573100    3.509400
H       1.556500   -2.257100    4.042500
C       1.787000   -1.070900    2.281600
C       0.362000   -2.496600    0.905000
C      -0.635000   -2.301700   -0.059200
C      -0.855300   -3.326000   -0.986000
H      -1.612600   -3.199900   -1.751400
C      -0.098100   -4.499300   -0.946700
H      -0.275200   -5.278300   -1.679300
C       0.883000   -4.665800    0.030300
H       1.470300   -5.576800    0.063200
C       1.116800   -3.661200    0.969800
H       1.881300   -3.773900    1.729700
C       2.280500   -0.720900   -1.278400
C       1.712600   -0.552700   -2.551900
H       1.094000    0.320000   -2.744800
C       1.935400   -1.488800   -3.559000
H       1.489400   -1.346000   -4.537600
C       2.724800   -2.613200   -3.304200
H       2.888900   -3.350600   -4.082600
C       3.299500   -2.784800   -2.045700
H       3.911000   -3.657100   -1.841100
C       3.085100   -1.840000   -1.039500
H       3.533300   -1.984800   -0.062300
C       3.146400    1.857000   -0.430200
C       4.412400    1.545100   -0.953200
H       4.674400    0.511200   -1.154200
C       5.332100    2.557300   -1.223400
H       6.306100    2.307600   -1.630700
C       4.996000    3.891200   -0.976100
H       5.712100    4.678300   -1.188400
C       3.735300    4.209100   -0.470800
H       3.464500    5.244600   -0.295500
C       2.807800    3.199300   -0.202800
H       1.808100    3.445600    0.141500
C      -2.529500   -0.790000    1.444000
C      -3.177200   -1.983600    1.797200
H      -3.044400   -2.870000    1.184600
C      -3.982600   -2.040300    2.934400
H      -4.478800   -2.968300    3.198000
C      -4.145400   -0.906600    3.734700
H      -4.770400   -0.952500    4.620200
C      -3.494400    0.280700    3.398300
H      -3.605000    1.160900    4.022600
C      -2.687600    0.337400    2.260600
H      -2.163000    1.254100    2.010800
C      -2.655600   -0.815700   -1.452400
C      -4.037600   -0.985800   -1.297200
H      -4.465100   -1.087900   -0.306300
C      -4.878100   -1.014200   -2.413400
H      -5.946600   -1.140100   -2.275700
C      -4.349200   -0.881600   -3.696700
H      -5.004100   -0.903400   -4.561100
C      -2.972000   -0.714000   -3.863600
H      -2.552300   -0.604800   -4.857900
C      -2.135300   -0.672000   -2.750600
H      -1.068100   -0.525700   -2.883100
C      -3.583600    4.021700    0.057200
C      -3.012200    2.715400   -0.539500
H      -4.659300    4.016500   -0.174400
H      -3.186600    2.688200   -1.623900
H      -3.547100    1.854400   -0.123000
C      -2.956300    5.265000   -0.587700
H      -3.407600    6.178600   -0.184500
H      -1.879300    5.293800   -0.391100
H      -3.103800    5.262000   -1.674000
C      -3.425500    4.043900    1.584900
H      -3.884800    4.942900    2.010600
H      -3.901000    3.167900    2.042200
H      -2.363800    4.043400    1.858700
C      -1.551600    2.527000   -0.315300
N      -0.487400    3.130600   -0.173100
Ni     -0.256700    1.151700   -0.112500
83
2 Molecule Name
P      -1.818900   -0.112500   -0.177500
P       1.679500    0.213400   -0.057700
O       0.081100   -0.428200    2.257800
C      -2.239700   -0.645300    1.553600
C      -3.546500   -1.013600    1.916400
H      -4.348700   -0.899000    1.198500
C      -3.830100   -1.549000    3.173300
H      -4.849100   -1.825600    3.417500
C      -2.807400   -1.742500    4.100900
H      -3.019000   -2.179000    5.070100
C      -1.505200   -1.364800    3.777400
H      -0.686000   -1.491000    4.474900
C      -1.243600   -0.810600    2.529400
C       0.380600    0.949200    2.284500
C       1.168500    1.433200    1.236500
C       1.433400    2.808900    1.219300
H       1.980100    3.241700    0.392300
C       0.965100    3.644500    2.233100
H       1.174200    4.707000    2.189200
C       0.219900    3.119000    3.287900
H      -0.139200    3.766100    4.080200
C      -0.083900    1.760200    3.313500
H      -0.687000    1.336600    4.108000
C      -1.807000    1.723600   -0.133300
C      -1.204600    2.373400   -1.221300
H      -0.759300    1.786200   -2.017600
C      -1.171200    3.764900   -1.284100
H      -0.698100    4.253100   -2.128800
C      -1.737400    4.521400   -0.256200
H      -1.706700    5.604800   -0.298900
C      -2.340800    3.882200    0.827900
H      -2.777400    4.467200    1.630100
C      -2.380500    2.488400    0.889100
H      -2.847400    1.997100    1.736200
C      -3.409000   -0.471300   -1.030200
C      -4.323900    0.531400   -1.378300
H      -4.101300    1.571700   -1.172200
C      -5.530100    0.198900   -1.998600
H      -6.227100    0.983800   -2.271300
C      -5.835300   -1.134700   -2.268900
H      -6.770300   -1.390400   -2.755500
C      -4.929000   -2.139100   -1.922900
H      -5.149500   -3.176200   -2.147100
C      -3.721600   -1.810800   -1.312600
H      -3.010500   -2.593800   -1.078400
C       3.167700   -0.566900    0.718300
C       3.102200   -1.064300    2.030300
H       2.189500   -0.964800    2.603500
C       4.192200   -1.726600    2.592200
H       4.120700   -2.108000    3.605000
C       5.363900   -1.909400    1.856300
H       6.209400   -2.427700    2.295000
C       5.437400   -1.426100    0.551100
H       6.339800   -1.567700   -0.033600
C       4.348000   -0.762400   -0.015800
H       4.425900   -0.398400   -1.033500
C       2.412500    1.260700   -1.380900
C       3.501600    2.121600   -1.157900
H       3.967100    2.160700   -0.178200
C       4.005500    2.908200   -2.192300
H       4.845000    3.569200   -2.006700
C       3.436500    2.836900   -3.466800
H       3.830900    3.448100   -4.271400
C       2.374800    1.965100   -3.706700
H       1.944900    1.884800   -4.698700
C       1.869000    1.176800   -2.671100
H       1.068300    0.469100   -2.870100
C       1.712600   -3.333400   -0.591500
C       1.605700   -2.215400   -1.644500
H       1.867200   -2.883100    0.399400
H       1.402900   -2.640500   -2.630500
H       2.551600   -1.663600   -1.720700
C       2.942400   -4.215000   -0.886900
H       3.051100   -5.003600   -0.131900
H       2.840300   -4.692900   -1.869400
H       3.859300   -3.615100   -0.888200
C       0.439800   -4.194700   -0.523500
H       0.579100   -5.037400    0.164800
H      -0.419700   -3.608800   -0.178600
H       0.188600   -4.589500   -1.514800
C      -0.824300   -1.841200   -2.466600
N      -1.357000   -2.281600   -3.422200
Ni      0.109000   -1.064100   -1.054500
83
3 Molecule Name
P      -1.828800    0.060600   -0.233400
P       1.994000    0.066400   -0.175500
O       0.107900   -0.816000    2.106800
C      -2.215000   -0.952200    1.271500
C      -3.470600   -1.553800    1.461400
H      -4.248500   -1.393000    0.725100
C      -3.738400   -2.374000    2.557800
H      -4.719200   -2.823100    2.664300
C      -2.744600   -2.620000    3.503000
H      -2.941500   -3.258800    4.356300
C      -1.485700   -2.047400    3.338300
H      -0.681100   -2.236300    4.038700
C      -1.226500   -1.227200    2.242800
C       0.524300    0.516200    2.240200
C       1.507000    0.994100    1.354600
C       1.948900    2.312100    1.557100
H       2.688200    2.731700    0.887200
C       1.434800    3.108400    2.578400
H       1.789200    4.125900    2.694200
C       0.458900    2.602100    3.434200
H       0.043400    3.220100    4.221700
C       0.008900    1.295600    3.270200
H      -0.752500    0.881900    3.921600
C      -1.903000    1.778300    0.435300
C      -1.182500    2.783500   -0.224300
H      -0.564600    2.529800   -1.079200
C      -1.267800    4.107000    0.210400
H      -0.705900    4.875700   -0.308300
C      -2.068900    4.439100    1.302900
H      -2.134300    5.469200    1.636800
C      -2.784600    3.441800    1.968200
H      -3.404000    3.693100    2.822800
C      -2.699100    2.118200    1.539800
H      -3.239600    1.346100    2.078900
C      -3.360000    0.007800   -1.257200
C      -4.592300    0.530600   -0.829900
H      -4.680900    0.984900    0.151000
C      -5.703700    0.496700   -1.669600
H      -6.648700    0.905300   -1.328500
C      -5.595300   -0.044700   -2.953400
H      -6.458800   -0.062500   -3.609500
C      -4.369700   -0.538400   -3.397500
H      -4.269700   -0.931100   -4.403000
C      -3.256700   -0.508300   -2.555300
H      -2.293800   -0.846700   -2.919000
C       3.018600   -1.362400    0.362100
C       2.965900   -1.919900    1.644500
H       2.345000   -1.470400    2.408200
C       3.688100   -3.079200    1.937100
H       3.634500   -3.505600    2.933100
C       4.470900   -3.690100    0.957600
H       5.026400   -4.592600    1.188100
C       4.538500   -3.132600   -0.321600
H       5.149500   -3.596900   -1.088000
C       3.816800   -1.977900   -0.617600
H       3.877400   -1.547800   -1.613000
C       3.293900    1.158600   -0.894700
C       4.559300    1.275000   -0.290900
H       4.787500    0.697100    0.599000
C       5.520200    2.127900   -0.828000
H       6.492400    2.212100   -0.354300
C       5.231600    2.871600   -1.976900
H       5.981800    3.533800   -2.396000
C       3.982300    2.756600   -2.584000
H       3.754200    3.322200   -3.480500
C       3.013400    1.903400   -2.046700
H       2.049100    1.810700   -2.533500
H       0.222600   -1.183000    0.009900
C      -0.037500    0.644600   -2.785600
N      -0.139800    1.304900   -3.758800
Ni      0.108600   -0.406500   -1.211300
C      -0.172100   -3.198700   -1.519500
C       0.445200   -2.506300   -2.502600
H      -0.092100   -2.141600   -3.372000
H       1.524400   -2.385900   -2.512700
C       0.578200   -3.827200   -0.369300
H       0.205400   -3.452700    0.590800
H       0.427900   -4.914800   -0.378700
H       1.649000   -3.623900   -0.419800
C      -1.651100   -3.498000   -1.544100
H      -2.137900   -3.135400   -0.630900
H      -2.150300   -3.048100   -2.404300
H      -1.810200   -4.583500   -1.582400
71
4 Molecule Name
P       1.761500   -0.090700   -0.287900
P      -1.757900   -0.052100   -0.456500
O      -0.222300    2.045000    0.697700
C       2.146100    1.579800    0.415800
C       3.462300    2.058200    0.517800
H       4.286400    1.409500    0.247100
C       3.728600    3.361700    0.938700
H       4.755100    3.703200    1.004000
C       2.680400    4.224700    1.256200
H       2.882900    5.244400    1.563000
C       1.364300    3.771600    1.175900
H       0.524500    4.415100    1.408800
C       1.115400    2.463500    0.776700
C      -0.753000    1.277500    1.746200
C      -1.561700    0.204400    1.356900
C      -2.091400   -0.611700    2.362100
H      -2.691600   -1.472400    2.092900
C      -1.837400   -0.339400    3.708000
H      -2.247800   -0.987900    4.473200
C      -1.052700    0.756700    4.064800
H      -0.859700    0.971500    5.109800
C      -0.498900    1.573900    3.079500
H       0.130900    2.416100    3.340500
C       1.462500   -1.165000    1.174100
C       0.836100   -2.397900    0.934800
H       0.546400   -2.664300   -0.077100
C       0.578900   -3.277700    1.983600
H       0.089300   -4.224600    1.785000
C       0.942200   -2.931900    3.286800
H       0.734700   -3.611000    4.106600
C       1.569200   -1.710100    3.533000
H       1.847500   -1.436300    4.544800
C       1.833800   -0.831100    2.481400
H       2.317500    0.119400    2.679900
C       3.422800   -0.644600   -0.849800
C       4.234100   -1.488400   -0.075700
H       3.880300   -1.863800    0.877500
C       5.501000   -1.857400   -0.529500
H       6.116800   -2.514700    0.074800
C       5.971900   -1.384800   -1.755300
H       6.954900   -1.676400   -2.109200
C       5.170400   -0.544800   -2.530000
H       5.520800   -0.186700   -3.491200
C       3.902100   -0.176200   -2.083800
H       3.276300    0.445900   -2.711100
C      -2.856700    1.351200   -0.916400
C      -3.696200    1.965900    0.026000
H      -3.679300    1.643600    1.062100
C      -4.543800    3.005700   -0.354400
H      -5.187700    3.471900    0.383500
C      -4.558800    3.448500   -1.678200
H      -5.216800    4.258700   -1.973200
C      -3.718800    2.851000   -2.618300
H      -3.716300    3.197200   -3.645900
C      -2.870000    1.809500   -2.241600
H      -2.209700    1.359400   -2.974400
C      -2.851000   -1.526600   -0.541400
C      -4.167800   -1.515300   -0.055700
H      -4.584800   -0.603500    0.359200
C      -4.951800   -2.666500   -0.116000
H      -5.969200   -2.645500    0.259100
C      -4.431200   -3.840600   -0.665900
H      -5.043200   -4.734800   -0.714700
C      -3.129600   -3.856400   -1.167400
H      -2.727800   -4.758200   -1.615700
C      -2.345200   -2.703300   -1.110400
H      -1.348400   -2.704100   -1.539900
H      -1.091600   -0.426800   -2.686500
C       0.930000   -0.387900   -3.343100
N       1.486900   -0.469300   -4.379200
Ni      0.014600   -0.219900   -1.739500
90
5 Molecule Name
P       2.201900    0.429500   -0.099900
P      -1.543000   -0.868000    0.031200
O       0.678900   -1.493700    1.825200
C       2.721300   -0.181200    1.569500
C       3.947100    0.198800    2.141700
H       4.596100    0.878800    1.602100
C       4.341400   -0.260600    3.396600
H       5.291000    0.057100    3.811600
C       3.510400   -1.119300    4.117500
H       3.804800   -1.472400    5.099200
C       2.298500   -1.527600    3.567300
H       1.626500   -2.191300    4.097600
C       1.922800   -1.072900    2.304900
C       0.573000   -2.501300    0.864900
C      -0.542100   -2.417300    0.014500
C      -0.720600   -3.439400   -0.925500
H      -1.568400   -3.401500   -1.598900
C       0.192900   -4.491600   -1.024000
H       0.040700   -5.266600   -1.766300
C       1.299800   -4.537100   -0.177300
H       2.019800   -5.343200   -0.260200
C       1.491800   -3.541500    0.780700
H       2.349500   -3.563800    1.442400
C       3.212700   -0.679600   -1.169600
C       2.578800   -1.699200   -1.888800
H       1.498900   -1.778200   -1.878600
C       3.331200   -2.604100   -2.639400
H       2.823800   -3.386600   -3.192000
C       4.719600   -2.492900   -2.685400
H       5.303000   -3.190300   -3.277100
C       5.360800   -1.473800   -1.974900
H       6.440500   -1.377900   -2.014100
C       4.612900   -0.575900   -1.217400
H       5.119400    0.215700   -0.675000
C       3.017000    2.064900   -0.252300
C       3.426600    2.495200   -1.524700
H       3.379200    1.813000   -2.367000
C       3.872700    3.802900   -1.715800
H       4.183200    4.122900   -2.704100
C       3.909200    4.697500   -0.644500
H       4.252800    5.714600   -0.796400
C       3.493200    4.280300    0.621000
H       3.510300    4.972800    1.455600
C       3.044500    2.973700    0.816500
H       2.707900    2.664300    1.800800
C      -2.309800   -0.837200    1.696600
C      -2.408800   -1.974700    2.507900
H      -1.994900   -2.918700    2.169600
C      -3.033000   -1.897000    3.753500
H      -3.098800   -2.781600    4.377900
C      -3.573000   -0.687000    4.194100
H      -4.060100   -0.629700    5.161700
C      -3.485200    0.447600    3.385400
H      -3.907700    1.390500    3.715200
C      -2.851800    0.373600    2.145500
H      -2.786500    1.256900    1.521500
C      -2.983200   -1.285900   -1.046900
C      -4.230500   -1.643700   -0.513600
H      -4.367800   -1.706100    0.559200
C      -5.311700   -1.905700   -1.356100
H      -6.271300   -2.173500   -0.927000
C      -5.161400   -1.820700   -2.740700
H      -6.003400   -2.023300   -3.394000
C      -3.922100   -1.470900   -3.280900
H      -3.793100   -1.396000   -4.355000
C      -2.840500   -1.199800   -2.442200
H      -1.891900   -0.904300   -2.876400
H       0.037000    0.820700    0.922800
C       0.142200    0.343800   -2.418100
N       0.186500    0.245000   -3.593400
Ni      0.050600    0.594700   -0.534200
C      -1.128400    3.209500   -0.149500
C      -0.276500    3.125200   -1.194000
H       0.779400    3.341000   -1.071000
H      -0.612500    2.932700   -2.205300
C      -0.633800    3.623800    1.218700
H      -1.004600    2.950800    1.998800
H       0.457500    3.612200    1.245300
H      -0.964500    4.641300    1.462900
C      -2.592500    2.974400   -0.306100
C      -3.513400    3.561400    0.578000
C      -3.086500    2.121500   -1.307800
C      -4.879600    3.299300    0.468200
H      -3.165700    4.224700    1.362000
C      -4.449000    1.853800   -1.412500
H      -2.394300    1.624200   -1.978900
C      -5.352100    2.438500   -0.522500
H      -5.572600    3.763100    1.162500
H      -4.798000    1.161900   -2.171600
H      -6.411500    2.219400   -0.597600
90
6 Molecule Name
P       2.055300    0.509700   -0.123100
P      -1.397300   -1.116000   -0.034700
O       0.545100   -0.710300    2.106100
C       2.538700    0.585800    1.661900
C       3.662300    1.245500    2.183700
H       4.367200    1.713200    1.506200
C       3.882200    1.317900    3.560300
H       4.757800    1.834600    3.936800
C       2.978500    0.733200    4.448700
H       3.140500    0.802000    5.518200
C       1.867100    0.049800    3.956100
H       1.149300   -0.423400    4.615200
C       1.673200   -0.027100    2.581900
C       0.681500   -2.012500    1.603000
C      -0.265700   -2.394600    0.645000
C      -0.191300   -3.698100    0.138700
H      -0.905800   -4.019800   -0.609500
C       0.808900   -4.573900    0.561000
H       0.861900   -5.571800    0.141900
C       1.749700   -4.156700    1.501300
H       2.540700   -4.827000    1.817100
C       1.683900   -2.871800    2.038000
H       2.414200   -2.534600    2.763400
C       2.858900   -1.064900   -0.655700
C       2.221400   -1.854900   -1.621100
H       1.275400   -1.535600   -2.043300
C       2.809100   -3.043900   -2.058300
H       2.304200   -3.643900   -2.807000
C       4.032300   -3.456100   -1.532800
H       4.485800   -4.381800   -1.871000
C       4.676500   -2.671900   -0.571900
H       5.630700   -2.986300   -0.162700
C       4.095400   -1.482600   -0.138200
H       4.600900   -0.881300    0.610200
C       3.142200    1.766100   -0.920800
C       3.725500    1.486500   -2.166400
H       3.629900    0.498300   -2.601100
C       4.418000    2.476500   -2.864100
H       4.856700    2.242100   -3.827500
C       4.541400    3.760300   -2.332400
H       5.080600    4.527400   -2.877200
C       3.957200    4.054300   -1.099700
H       4.040100    5.051000   -0.679700
C       3.256200    3.069200   -0.404700
H       2.798700    3.321800    0.546100
C      -2.514800   -0.710600    1.377300
C      -2.414400   -1.296600    2.645500
H      -1.651800   -2.040100    2.843700
C      -3.294100   -0.926200    3.664200
H      -3.203700   -1.386400    4.642400
C      -4.283500    0.029700    3.429100
H      -4.960800    0.319700    4.225200
C      -4.401300    0.606100    2.163100
H      -5.164200    1.349700    1.961300
C      -3.526100    0.232800    1.144700
H      -3.635800    0.681800    0.164800
C      -2.517700   -2.122200   -1.093800
C      -3.516800   -2.930800   -0.523700
H      -3.659100   -2.938400    0.551800
C      -4.332100   -3.719200   -1.332600
H      -5.101800   -4.336700   -0.882300
C      -4.160400   -3.711200   -2.719900
H      -4.797800   -4.323600   -3.348900
C      -3.172500   -2.911300   -3.292400
H      -3.036000   -2.893500   -4.367900
C      -2.353000   -2.117300   -2.485500
H      -1.598400   -1.489500   -2.944700
C      -1.008600    2.716500   -0.036400
C      -0.212600    2.641700   -1.311800
H       0.815300    2.996400   -1.263400
H      -0.713300    2.970700   -2.217000
C      -0.289600    3.447400    1.108000
H      -0.803500    3.307800    2.063900
H       0.718800    3.040300    1.218600
H      -0.214000    4.518400    0.895100
C      -0.164600    0.424700   -2.765200
N      -0.008700    0.170700   -3.907600
Ni     -0.340200    0.756200   -0.942100
C      -2.466400    3.107500   -0.258600
C      -3.148600    3.959300    0.614800
C      -3.167500    2.568200   -1.350300
C      -4.498200    4.261800    0.409300
H      -2.639300    4.393000    1.467000
C      -4.511400    2.868700   -1.556300
H      -2.658900    1.884700   -2.024800
C      -5.185700    3.716600   -0.673100
H      -5.008700    4.925000    1.099900
H      -5.032700    2.435500   -2.403000
H      -6.233200    3.949100   -0.830900
H      -1.073500    1.628600    0.404000
90
7 Molecule Name
P       1.049700    1.408200    0.034900
P      -1.918900   -0.734500    0.034400
O      -0.963200    0.771400   -2.216200
C       1.216800    1.751700   -1.780700
C       2.379300    2.322600   -2.325600
H       3.184400    2.619500   -1.664200
C       2.528000    2.492700   -3.702300
H       3.438000    2.933900   -4.091900
C       1.518500    2.081900   -4.572800
H       1.637200    2.198300   -5.643800
C       0.351500    1.519200   -4.059300
H      -0.452100    1.185200   -4.704100
C       0.212700    1.371700   -2.683600
C      -1.917300    1.548100   -1.540500
C      -2.573500    0.905900   -0.486300
C      -3.541600    1.636900    0.213600
H      -4.051700    1.184300    1.054600
C      -3.828200    2.957600   -0.133700
H      -4.566200    3.512900    0.433100
C      -3.154200    3.567300   -1.191300
H      -3.365500    4.597900   -1.451500
C      -2.192700    2.858400   -1.909900
H      -1.650100    3.320500   -2.726100
C       0.202800    2.890000    0.703500
C      -0.532000    2.734200    1.887500
H      -0.588600    1.759200    2.361000
C      -1.176600    3.829900    2.461700
H      -1.739000    3.700400    3.379500
C      -1.095600    5.085000    1.857600
H      -1.597700    5.936100    2.304900
C      -0.366500    5.246400    0.677300
H      -0.301900    6.221100    0.205800
C       0.281000    4.154200    0.101800
H       0.839400    4.281700   -0.820200
C       2.798300    1.592000    0.562400
C       3.308800    2.744600    1.168400
H       2.661000    3.590900    1.367700
C       4.654900    2.801700    1.538700
H       5.041400    3.694500    2.018100
C       5.495200    1.713500    1.304800
H       6.538000    1.760100    1.599500
C       4.988100    0.557600    0.705700
H       5.624200   -0.304900    0.540300
C       3.646900    0.496000    0.340900
H       3.255200   -0.421000   -0.087900
C      -2.614000   -1.948100   -1.171100
C      -2.842600   -1.619800   -2.515500
H      -2.663300   -0.613400   -2.868000
C      -3.280100   -2.590300   -3.417400
H      -3.453700   -2.317800   -4.452700
C      -3.491600   -3.902900   -2.995400
H      -3.827100   -4.655700   -3.700200
C      -3.274000   -4.239400   -1.658900
H      -3.443200   -5.254300   -1.316300
C      -2.843500   -3.271100   -0.753000
H      -2.705800   -3.545500    0.286600
C      -2.922500   -1.093000    1.536700
C      -4.302000   -1.352600    1.450300
H      -4.785300   -1.380700    0.478900
C      -5.051300   -1.581500    2.602400
H      -6.114300   -1.781500    2.522700
C      -4.432500   -1.557100    3.855800
H      -5.015300   -1.739300    4.752200
C      -3.064200   -1.307200    3.950900
H      -2.574600   -1.297200    4.918100
C      -2.309800   -1.077200    2.797500
H      -1.241100   -0.906600    2.881700
C       1.052000   -3.230800   -0.177000
C       0.241600   -2.624000    0.998600
H       0.607300   -4.218300   -0.384300
H       0.662900   -2.901900    1.966000
H      -0.783700   -3.003400    0.971900
C       0.921700   -2.421400   -1.495000
H       1.478600   -2.909800   -2.301900
H      -0.120500   -2.330700   -1.808900
H       1.337000   -1.410600   -1.380800
C       1.240600   -0.486500    2.295300
N       1.671700   -0.304900    3.378600
Ni      0.262700   -0.677800    0.714100
C       2.533200   -3.489000    0.102700
C       3.250200   -2.873600    1.134600
C       3.224400   -4.373200   -0.743300
C       4.616600   -3.120000    1.303900
H       2.755500   -2.192300    1.813600
C       4.584900   -4.622700   -0.577000
H       2.682900   -4.875200   -1.541700
C       5.291200   -3.990100    0.449700
H       5.144100   -2.628100    2.115000
H       5.093100   -5.312900   -1.243000
H       6.350200   -4.183000    0.585600
90
8 Molecule Name
P      -1.848500    0.497800   -0.277600
P       1.145100   -1.392100   -0.166000
O      -1.502400   -2.505100   -0.552800
C      -3.161400   -0.735700   -0.699400
C      -4.479500   -0.377000   -1.019000
H      -4.777800    0.662600   -0.950300
C      -5.406900   -1.330200   -1.443200
H      -6.418300   -1.023600   -1.685000
C      -5.030500   -2.667200   -1.569400
H      -5.743800   -3.407500   -1.913300
C      -3.726600   -3.051100   -1.256900
H      -3.395400   -4.077700   -1.358800
C      -2.818600   -2.093800   -0.817600
C      -1.102900   -2.749200    0.769900
C       0.186700   -2.320900    1.111100
C       0.618000   -2.546400    2.423600
H       1.601200   -2.207000    2.727400
C      -0.207500   -3.185400    3.351000
H       0.142900   -3.339900    4.365000
C      -1.478000   -3.618100    2.973800
H      -2.120400   -4.117900    3.690300
C      -1.933300   -3.401400    1.673800
H      -2.924000   -3.718400    1.369600
C      -1.762500    0.429600    1.563100
C      -0.658400    1.064400    2.152800
H       0.073800    1.555200    1.519600
C      -0.494700    1.069700    3.535300
H       0.368400    1.562800    3.970000
C      -1.432400    0.430200    4.349600
H      -1.302100    0.420300    5.426500
C      -2.535000   -0.201100    3.773300
H      -3.262500   -0.704500    4.401200
C      -2.703700   -0.197900    2.386800
H      -3.559600   -0.698900    1.946100
C      -2.705800    2.110500   -0.529900
C      -3.592900    2.661400    0.409500
H      -3.798000    2.133300    1.335000
C      -4.202700    3.892100    0.166700
H      -4.885000    4.309500    0.899700
C      -3.931400    4.586500   -1.015100
H      -4.403800    5.545300   -1.201000
C      -3.044100    4.049900   -1.948700
H      -2.819900    4.591200   -2.861500
C      -2.428800    2.818800   -1.709700
H      -1.701900    2.421700   -2.411100
C       1.562500   -2.732900   -1.363000
C       1.582400   -4.089900   -1.007500
H       1.321300   -4.387000    0.003100
C       1.922900   -5.063100   -1.947200
H       1.931500   -6.109300   -1.660200
C       2.244700   -4.693200   -3.254400
H       2.506100   -5.450600   -3.985600
C       2.219100   -3.346500   -3.619700
H       2.454100   -3.053800   -4.637400
C       1.876100   -2.372700   -2.681300
H       1.830800   -1.328500   -2.973000
C       2.743200   -1.121300    0.716000
C       3.723200   -2.115400    0.863500
H       3.576800   -3.090700    0.412500
C       4.892000   -1.857100    1.579500
H       5.643900   -2.632500    1.680400
C       5.094000   -0.604700    2.163800
H       6.002100   -0.406100    2.723200
C       4.130400    0.393000    2.015500
H       4.281300    1.372400    2.454000
C       2.966300    0.140300    1.287900
H       2.235600    0.930900    1.149200
C       3.209300    3.094800   -1.822900
C       2.959700    1.587500   -2.143500
H       4.301400    3.209200   -1.779300
H       3.484400    0.966600   -1.412100
H       3.378700    1.365900   -3.134300
C       2.684500    3.998700   -2.949100
H       2.848300    5.053100   -2.705400
H       3.204600    3.775200   -3.887300
H       1.615000    3.839500   -3.116000
C       1.508200    1.260100   -2.128700
N       0.432000    1.671600   -2.565600
Ni      0.194600    0.305900   -1.147500
C       2.666200    3.479900   -0.451300
C       1.305800    3.757500   -0.238400
C       3.534500    3.547700    0.645700
C       0.830300    4.064700    1.037000
H       0.606200    3.713600   -1.064100
C       3.063300    3.862600    1.922400
H       4.591500    3.343200    0.498700
C       1.705600    4.113200    2.124600
H      -0.228300    4.256400    1.178400
H       3.757500    3.916500    2.755400
H       1.333400    4.354200    3.114800
90
9 Molecule Name
P      -2.048600    0.649400   -0.174900
P       1.322800   -1.298300   -0.118600
O      -0.878400   -1.552900    1.591000
C      -2.790000   -0.139900    1.324600
C      -4.087500    0.209300    1.733300
H      -4.602400    1.013400    1.219800
C      -4.728100   -0.458400    2.774600
H      -5.727500   -0.163100    3.072100
C      -4.086500   -1.520900    3.411000
H      -4.588100   -2.071200    4.199000
C      -2.799200   -1.888200    3.028000
H      -2.310500   -2.738200    3.486800
C      -2.144900   -1.176900    2.019300
C       0.257800   -1.681400    2.396700
C       1.453100   -1.731900    1.660300
C       2.653500   -1.917700    2.348000
H       3.586000   -1.955200    1.796600
C       2.665300   -2.017600    3.741300
H       3.604000   -2.155500    4.264900
C       1.473200   -1.903800    4.451400
H       1.479400   -1.937400    5.535100
C       0.257100   -1.735000    3.784400
H      -0.655100   -1.611400    4.350600
C      -2.867900    2.297700   -0.138100
C      -2.504200    3.164000    0.908700
H      -1.775900    2.843200    1.647500
C      -3.060900    4.438000    0.990100
H      -2.771900    5.096800    1.801500
C      -3.976400    4.868900    0.026100
H      -4.405100    5.863300    0.088900
C      -4.338600    4.015900   -1.016000
H      -5.051800    4.343000   -1.765000
C      -3.791500    2.732400   -1.097400
H      -4.091600    2.073100   -1.904300
C      -2.912700   -0.251400   -1.535100
C      -2.552600    0.064700   -2.856700
H      -1.802900    0.828500   -3.038400
C      -3.121000   -0.612700   -3.932700
H      -2.834300   -0.352800   -4.945900
C      -4.046700   -1.635300   -3.704600
H      -4.483000   -2.170700   -4.541000
C      -4.401700   -1.965000   -2.397900
H      -5.112500   -2.762600   -2.211400
C      -3.844600   -1.273700   -1.318900
H      -4.129800   -1.547000   -0.310200
C       0.504700   -2.789300   -0.831300
C       0.676000   -4.047400   -0.231100
H       1.293800   -4.141700    0.656000
C       0.047500   -5.175500   -0.756600
H       0.186800   -6.139600   -0.279400
C      -0.764700   -5.063000   -1.887300
H      -1.260300   -5.939700   -2.290400
C      -0.938900   -3.818400   -2.492100
H      -1.577400   -3.714100   -3.362400
C      -0.306400   -2.690100   -1.968400
H      -0.465400   -1.725800   -2.435200
C       3.056700   -1.417100   -0.706200
C       3.569900   -2.536300   -1.377200
H       2.927100   -3.381100   -1.597400
C       4.909700   -2.568700   -1.766700
H       5.296400   -3.437700   -2.288300
C       5.749600   -1.491400   -1.480600
H       6.792500   -1.522100   -1.777800
C       5.245000   -0.372500   -0.815400
H       5.885200    0.473000   -0.594600
C       3.902600   -0.328000   -0.439600
H       3.511400    0.549900    0.066100
C       0.454000    1.327300    1.449100
N       0.568100    1.852500    2.500400
Ni      0.174600    0.580200   -0.276900
H      -0.045900   -0.005100   -1.603500
C       0.982100    2.306500   -1.997600
C       1.421100    3.126900   -1.017900
H       1.642900    1.604200   -2.495500
H      -0.026800    2.397000   -2.386800
C       2.855400    3.145200   -0.609400
C       3.227800    3.246800    0.740700
C       3.862600    3.102900   -1.586000
C       4.575200    3.283800    1.099400
H       2.466300    3.249400    1.511900
C       5.208700    3.158200   -1.226300
H       3.585000    3.047300   -2.633400
C       5.569800    3.247100    0.119400
H       4.845500    3.343900    2.148000
H       5.973000    3.135000   -1.995900
H       6.616600    3.293300    0.401800
C       0.519600    4.145100   -0.366300
H       0.430500    3.955300    0.708000
H       0.933100    5.152200   -0.495600
H      -0.485000    4.113300   -0.794500
20
COD Molecule Name
C      -1.188500   -1.234700   -0.517600
C       0.045100   -1.683200   -0.253100
C       1.084000   -1.092000    0.672600
C       1.922700    0.028800    0.017900
C       1.188500    1.234700   -0.517600
C      -0.045100    1.683200   -0.253100
C      -1.084000    1.092000    0.672600
C      -1.922700   -0.028700    0.017900
H      -2.682200   -0.366000    0.740200
H      -2.485900    0.411800   -0.817000
H      -0.632900    0.732300    1.599900
H      -1.777700    1.888000    0.970300
H       0.632900   -0.732300    1.599900
H       1.777700   -1.888000    0.970300
H       2.682200    0.366000    0.740200
H       2.485900   -0.411800   -0.817000
H      -0.366700    2.578100   -0.785300
H       1.777600    1.816400   -1.227000
H      -1.777700   -1.816400   -1.227000
H       0.366700   -2.578100   -0.785300
88
Cplx1 Molecule Name
P      -1.768000    0.021000   -0.052600
P       1.825200   -0.136800   -0.074200
O       0.066600   -2.161100   -0.840800
C      -2.216500   -1.471000   -1.078400
C      -3.482000   -1.728300   -1.626100
H      -4.284400   -1.015500   -1.476800
C      -3.729200   -2.890100   -2.361100
H      -4.717200   -3.062100   -2.773600
C      -2.713300   -3.823700   -2.566300
H      -2.902700   -4.723400   -3.140800
C      -1.445400   -3.593000   -2.033000
H      -0.626400   -4.285200   -2.188600
C      -1.221700   -2.435000   -1.296100
C       0.575300   -2.553900    0.395100
C       1.599100   -1.721600    0.872200
C       2.254100   -2.121500    2.041200
H       3.084200   -1.539000    2.421500
C       1.846000   -3.262000    2.738200
H       2.360300   -3.547000    3.649200
C       0.775200   -4.023400    2.271800
H       0.439600   -4.892800    2.825800
C       0.138000   -3.680100    1.078700
H      -0.685700   -4.268900    0.692500
C      -1.904900   -0.783000    1.617600
C      -0.953200   -0.468200    2.595200
H      -0.172100    0.244400    2.350200
C      -0.980900   -1.089100    3.844700
H      -0.223400   -0.848700    4.582600
C      -1.969300   -2.029200    4.134200
H      -1.988300   -2.518800    5.102100
C      -2.932100   -2.343600    3.171800
H      -3.702800   -3.074500    3.392400
C      -2.898600   -1.726600    1.922600
H      -3.641400   -1.987700    1.175900
C      -3.349600    0.969900   -0.145400
C      -4.114100    1.284900    0.985900
H      -3.846800    0.871600    1.951600
C      -5.213300    2.142000    0.885900
H      -5.786200    2.383700    1.774900
C      -5.571300    2.686900   -0.346600
H      -6.422300    3.355100   -0.421800
C      -4.825300    2.368700   -1.485000
H      -5.095300    2.788500   -2.448100
C      -3.721800    1.525200   -1.382800
H      -3.133400    1.304100   -2.267700
C       2.581000   -0.847100   -1.610400
C       3.793800   -1.551900   -1.593600
H       4.341500   -1.658900   -0.662500
C       4.297700   -2.124700   -2.761200
H       5.239300   -2.662900   -2.735000
C       3.586900   -2.012800   -3.958400
H       3.979100   -2.458600   -4.866400
C       2.365300   -1.338500   -3.979300
H       1.798400   -1.266700   -4.901300
C       1.864800   -0.763300   -2.810800
H       0.895900   -0.274800   -2.809200
C       3.273100    0.638500    0.778700
C       4.390600    1.114600    0.075200
H       4.485500    0.916000   -0.986300
C       5.383500    1.854700    0.720200
H       6.234800    2.215400    0.152700
C       5.283900    2.131500    2.083300
H       6.056300    2.705500    2.583400
C       4.178000    1.667700    2.798300
H       4.084000    1.881400    3.857700
C       3.182400    0.938000    2.150700
H       2.318200    0.606200    2.718100
Ni      0.075600    1.238600   -0.298800
C       0.962200    2.452800   -1.796400
C      -0.416400    2.614400   -1.860100
C      -1.128800    3.849900   -1.326000
C      -1.549300    3.774300    0.165400
C      -0.713800    2.827900    1.002800
C       0.665200    2.849000    1.051800
C       1.515100    3.859400    0.298800
C       1.919500    3.424600   -1.134000
H       2.045400    4.320200   -1.764000
H       2.901000    2.943300   -1.086200
H       0.975500    4.814900    0.256400
H       2.429400    4.048000    0.874000
H      -0.476900    4.720600   -1.478800
H      -2.025900    4.033800   -1.928900
H      -1.507800    4.784100    0.604600
H      -2.593800    3.459400    0.228000
H       1.152900    2.340900    1.877300
H      -1.250800    2.316100    1.800900
H       1.430300    1.782200   -2.511900
H      -0.954700    2.031600   -2.604900
67
DPEphos Molecule Name
O       0.119500   -1.198100   -0.612400
C       1.346000   -1.797200   -0.921900
C       1.393100   -2.904600   -1.762700
C       2.488900   -1.279300   -0.293100
C       2.622800   -3.510400   -2.020500
H       0.474500   -3.283500   -2.195600
C       3.712200   -1.907600   -0.569100
C       3.781000   -3.006300   -1.428500
H       2.671900   -4.373500   -2.674800
H       4.618800   -1.535800   -0.106000
H       4.740000   -3.471800   -1.626700
C      -0.613700   -0.467100   -1.550800
C      -1.718900    0.213700   -1.015400
C      -0.284700   -0.398000   -2.900600
C      -2.491200    0.984500   -1.890800
C      -1.074300    0.378900   -3.749700
H       0.581800   -0.922300   -3.283600
C      -2.173800    1.071700   -3.248800
H      -3.348400    1.524500   -1.506000
H      -0.820900    0.442500   -4.802400
H      -2.786600    1.676600   -3.907400
P       2.261000    0.047600    0.984700
P      -1.982400    0.091300    0.812100
C       1.651000    1.455900   -0.040900
C       0.821300    2.393700    0.593000
C       1.923600    1.613100   -1.407600
C       0.273600    3.458100   -0.123300
H       0.583600    2.269400    1.644600
C       1.369300    2.672500   -2.126300
H       2.549200    0.886500   -1.917100
C       0.540000    3.594400   -1.486500
H      -0.370400    4.172900    0.378400
H       1.570200    2.767500   -3.187800
H       0.098300    4.410100   -2.048300
C       4.028500    0.513100    1.292100
C       4.762100    1.434100    0.529200
C       4.662700   -0.117700    2.375800
C       6.095900    1.707600    0.835900
H       4.289000    1.945200   -0.301900
C       5.999500    0.147000    2.676300
H       4.100800   -0.816700    2.988600
C       6.719000    1.061600    1.905700
H       6.648900    2.424500    0.238200
H       6.473800   -0.351400    3.515000
H       7.756600    1.274200    2.140100
C      -2.594500   -1.647800    0.956200
C      -2.473200   -2.270800    2.207000
C      -3.165200   -2.368900   -0.103900
C      -2.923500   -3.577700    2.399400
H      -2.013000   -1.732200    3.029900
C      -3.610100   -3.677600    0.085800
H      -3.258500   -1.903800   -1.079800
C      -3.492500   -4.283700    1.338500
H      -2.821300   -4.046100    3.372400
H      -4.048600   -4.223000   -0.743400
H      -3.837900   -5.301600    1.485200
C      -3.555400    1.058400    0.969100
C      -3.421400    2.436000    1.212200
C      -4.845700    0.518700    0.864300
C      -4.543900    3.256200    1.326500
H      -2.428000    2.864500    1.309700
C      -5.970100    1.336800    0.991100
H      -4.973300   -0.543300    0.685900
C      -5.822700    2.706200    1.217200
H      -4.421100    4.318600    1.508200
H      -6.961200    0.902800    0.910300
H      -6.698000    3.339900    1.312700
41
NI(COD)2 Molecule Name
C       1.359100   -1.533400   -0.612000
C       1.503600   -0.462700   -1.475700
C       2.609600    0.580500   -1.414400
C       2.220100    1.834100   -0.597400
C       1.358500    1.533300    0.611800
C       1.502300    0.462300    1.475700
C       2.608500   -0.580800    1.415100
C       2.219900   -1.834400    0.597600
H       3.128500   -2.381300    0.300100
H       1.651900   -2.512200    1.247200
H       3.520400   -0.130400    1.009900
H       2.858400   -0.891200    2.436600
H       3.521200    0.130200   -1.008300
H       2.860300    0.890800   -2.435700
H       3.128300    2.381500   -0.299700
H       1.652100    2.511500   -1.247500
H       0.969500    0.519400    2.421500
H       0.742700    2.364600    0.950400
H       0.742600   -2.364200   -0.950600
H       0.970300   -0.518900   -2.421200
Ni     -0.000000    0.000700    0.000100
C      -1.358800    1.533100   -0.612000
C      -1.502700    0.462200   -1.476000
C      -2.608500   -0.581200   -1.415100
C      -2.219800   -1.834600   -0.597400
C      -1.358700   -1.533300    0.612000
C      -1.503200   -0.462500    1.475700
C      -2.609300    0.580600    1.414400
C      -2.220300    1.834200    0.597100
H      -3.128600    2.381300    0.299300
H      -1.652400    2.511800    1.247000
H      -3.521000    0.130100    1.008700
H      -2.859800    0.891000    2.435800
H      -3.520600   -0.130900   -1.009900
H      -2.858500   -0.891800   -2.436600
H      -3.128300   -2.381600   -0.299800
H      -1.651800   -2.512500   -1.247000
H      -0.970100   -0.518800    2.421200
H      -0.742500   -2.364300    0.950800
H      -0.743200    2.364600   -0.950800
H      -0.969500    0.519100   -2.421500
12
P1 Molecule Name
C      -0.000100    0.125400   -0.000100
C      -0.000400    1.463300   -0.000000
H       0.923700    2.033700    0.000200
H      -0.924800    2.033100    0.000100
C      -1.275800   -0.682200    0.000000
H      -2.161800   -0.041200   -0.000200
H      -1.323000   -1.334600   -0.881500
H      -1.323100   -1.334000    0.882000
C       1.276200   -0.681500    0.000100
H       1.323400   -1.334300    0.881300
H       1.324300   -1.332900   -0.882200
H       2.161800   -0.040000    0.000900
22
P2-B Molecule Name
C      -2.492600   -0.991100   -0.000000
C      -1.112500   -1.181700    0.000100
C      -0.236500   -0.086700    0.000200
C      -0.776100    1.203400    0.000100
C      -2.159600    1.395100    0.000000
C      -3.022500    0.300800   -0.000000
H      -3.154000   -1.850700   -0.000100
H      -0.720300   -2.193800    0.000000
H      -0.119300    2.066600    0.000200
H      -2.559100    2.403300    0.000000
H      -4.096400    0.450600   -0.000100
C       1.280300   -0.346600    0.000100
C       1.693900   -1.135000   -1.271300
H       1.408400   -0.588600   -2.173800
H       2.775400   -1.300200   -1.283000
H       1.194200   -2.107600   -1.281400
C       1.694300   -1.135600    1.270900
H       1.408900   -0.589700    2.173800
H       1.194800   -2.108200    1.280600
C       2.026500    0.926800    0.000100
N       2.645800    1.917600    0.000000
H       2.775800   -1.300500    1.282400
22
P2-L Molecule Name
C      -2.509200    1.138800   -0.532300
C      -1.143700    1.076600   -0.256900
C      -0.559200   -0.111100    0.204600
C      -1.375700   -1.233900    0.382100
C      -2.743500   -1.174900    0.109400
C      -3.314100    0.012300   -0.349300
H      -2.945800    2.065800   -0.888100
H      -0.532600    1.963500   -0.398500
H      -0.937000   -2.160800    0.740200
H      -3.360400   -2.054900    0.255800
H      -4.376400    0.061600   -0.561000
C       0.931600   -0.190900    0.495900
H       1.142500   -1.190500    0.896600
C       1.386900    0.845200    1.536600
H       0.818400    0.727300    2.463400
H       2.450600    0.724200    1.765300
H       1.232200    1.866900    1.172200
C       1.727800   -0.050300   -0.832400
H       1.364900   -0.788200   -1.556600
H       1.547200    0.940500   -1.267100
C       3.167300   -0.229700   -0.647500
N       4.312400   -0.378300   -0.469100
15
R1 Molecule Name
C       0.972900   -0.000000    0.403300
C      -0.426700   -0.000000    1.072300
H      -0.531500    0.882700    1.714200
H      -0.531500   -0.882900    1.714100
C       1.188200   -1.268500   -0.433400
H       2.197400   -1.282100   -0.857200
H       1.061300   -2.172800    0.171900
H       0.473200   -1.311200   -1.263500
C      -1.516900    0.000100    0.095100
N      -2.361900    0.000000   -0.711900
C       1.188300    1.268400   -0.433300
H       1.061500    2.172800    0.172000
H       2.197500    1.282000   -0.857300
H       0.473300    1.311300   -1.263400
H       1.697500   -0.000100    1.229000
19
R2 Molecule Name
C       1.860200   -1.220400   -0.225500
C       0.466600   -1.160800   -0.228000
C      -0.204800    0.053700   -0.014900
C       0.567400    1.202500    0.226800
C       1.959400    1.144300    0.229800
C       2.612900   -0.068000    0.000900
H       2.357100   -2.168800   -0.400100
H      -0.098900   -2.068200   -0.409400
H       0.070000    2.142900    0.438500
H       2.533900    2.044000    0.423300
H       3.696400   -0.115300    0.007700
C      -1.694500    0.121500   -0.031500
C      -2.345400    1.224900   -0.429200
H      -3.429300    1.275200   -0.416500
H      -1.825600    2.102500   -0.799200
C      -2.449900   -1.113800    0.406100
H      -2.357600   -1.919400   -0.332900
H      -2.064300   -1.497700    1.357000
H      -3.514700   -0.897900    0.524300
90
TS11-12 Molecule Name
P       2.102000    0.321900    0.105900
P      -1.490400   -0.770600    0.029800
O       0.763200   -2.239600    1.040400
C       2.826900   -0.966200    1.223900
C       4.106700   -0.876000    1.794800
H       4.728600   -0.017200    1.568700
C       4.587600   -1.860400    2.658900
H       5.578300   -1.760900    3.087700
C       3.793000   -2.962900    2.975100
H       4.157700   -3.724600    3.654800
C       2.523900   -3.084900    2.411600
H       1.877600   -3.924700    2.636300
C       2.062000   -2.101000    1.542600
C       0.542400   -2.637600   -0.285700
C      -0.606500   -2.108400   -0.889500
C      -0.908700   -2.532000   -2.188600
H      -1.791200   -2.144600   -2.684200
C      -0.069500   -3.418900   -2.866400
H      -0.312100   -3.721100   -3.878800
C       1.087100   -3.896200   -2.251500
H       1.753900   -4.564200   -2.784600
C       1.395500   -3.513600   -0.945900
H       2.290700   -3.877300   -0.455200
C       2.634800   -0.302900   -1.544300
C       1.747700   -0.202000   -2.622800
H       0.783200    0.267700   -2.479500
C       2.106500   -0.695500   -3.878300
H       1.406900   -0.616000   -4.702700
C       3.351300   -1.293800   -4.066300
H       3.626400   -1.683100   -5.040800
C       4.245900   -1.391000   -2.997000
H       5.217200   -1.852700   -3.139600
C       3.890900   -0.896900   -1.743800
H       4.588400   -0.984600   -0.917400
C       3.194400    1.776900    0.382200
C       3.660100    2.531600   -0.703400
H       3.490900    2.184000   -1.716000
C       4.318300    3.744100   -0.490000
H       4.664700    4.320100   -1.340900
C       4.523400    4.217400    0.806000
H       5.033600    5.160700    0.967700
C       4.063200    3.473100    1.895200
H       4.217400    3.834300    2.906500
C       3.397600    2.266600    1.684700
H       3.033800    1.700900    2.537900
C      -2.254800   -1.742200    1.397300
C      -2.831400   -3.003500    1.182500
H      -2.836200   -3.428200    0.183600
C      -3.387900   -3.718000    2.242700
H      -3.832300   -4.691200    2.063200
C      -3.367700   -3.184800    3.533900
H      -3.799700   -3.741300    4.358700
C      -2.780300   -1.940100    3.761100
H      -2.746900   -1.527400    4.763700
C      -2.224000   -1.227500    2.697800
H      -1.744700   -0.272400    2.878300
C      -2.900000   -0.411500   -1.104500
C      -4.219500   -0.828400   -0.886200
H      -4.472100   -1.391700    0.004200
C      -5.223900   -0.510500   -1.802800
H      -6.241800   -0.835900   -1.615800
C      -4.922900    0.221900   -2.950700
H      -5.703800    0.462900   -3.664400
C      -3.614300    0.656300   -3.170200
H      -3.372400    1.246500   -4.047400
C      -2.613700    0.354400   -2.248600
H      -1.612000    0.741100   -2.404800
C      -0.050500    2.313900   -0.858300
N       0.073100    2.790700   -1.940700
Ni     -0.037500    0.928700    0.339300
C      -0.186600    2.437000    2.100800
C      -0.827500    2.889600    0.774800
H      -0.165700    1.336200    2.282800
H       0.833200    2.818500    2.173100
H      -0.764800    2.852200    2.935000
C      -2.328700    2.692700    0.680900
C      -3.020000    3.113300   -0.466400
C      -3.072000    2.107500    1.716800
C      -4.397900    2.944900   -0.575500
H      -2.464900    3.530000   -1.299400
C      -4.451400    1.933300    1.606500
H      -2.580100    1.771100    2.620900
C      -5.122300    2.351500    0.458700
H      -4.902200    3.253800   -1.484400
H      -4.995800    1.463300    2.418800
H      -6.192400    2.204900    0.363600
C      -0.427200    4.368300    0.570500
H      -0.838800    4.777000   -0.352400
H      -0.813600    4.946500    1.420200
H       0.660500    4.470500    0.533200
83
TS1-2 Molecule Name
P      -1.829500    0.006200    0.343800
P       1.689000   -0.376500    0.151200
O       0.068200    0.583100   -2.022200
C      -2.257400    0.749400   -1.304100
C      -3.549100    1.209700   -1.601600
H      -4.346300    1.049500   -0.886000
C      -3.822300    1.893700   -2.787500
H      -4.829800    2.242600   -2.983000
C      -2.802900    2.143400   -3.704400
H      -3.006500    2.690500   -4.617800
C      -1.511100    1.689100   -3.439200
H      -0.691600    1.876300   -4.122800
C      -1.258800    0.993500   -2.263000
C       0.443600   -0.741600   -2.300000
C       1.268400   -1.360700   -1.351900
C       1.631900   -2.692300   -1.587300
H       2.218700   -3.226900   -0.851200
C       1.219200   -3.356800   -2.742400
H       1.506600   -4.390100   -2.898400
C       0.432100   -2.697800   -3.686400
H       0.115700   -3.209700   -4.588200
C       0.033700   -1.381500   -3.464500
H      -0.601500   -0.862300   -4.172400
C      -1.722500   -1.801500   -0.004200
C      -1.132100   -2.603700    0.983000
H      -0.762500   -2.144200    1.892600
C      -1.008300   -3.980100    0.806000
H      -0.539100   -4.581700    1.576800
C      -1.476400   -4.574500   -0.367200
H      -1.372000   -5.643900   -0.515100
C      -2.075800   -3.787600   -1.351400
H      -2.439200   -4.244000   -2.265800
C      -2.204300   -2.409800   -1.169700
H      -2.669800   -1.805900   -1.941400
C      -3.448900    0.084600    1.229500
C      -4.351300   -0.992400    1.241000
H      -4.104700   -1.918600    0.735600
C      -5.573500   -0.884200    1.904900
H      -6.259300   -1.724900    1.906600
C      -5.912600    0.299300    2.562700
H      -6.864000    0.382300    3.077600
C      -5.021800    1.373100    2.555900
H      -5.272300    2.295800    3.067800
C      -3.795500    1.272100    1.896600
H      -3.109700    2.113800    1.912200
C       3.167800    0.589200   -0.385000
C       3.285500    1.107700   -1.683000
H       2.553400    0.852500   -2.439500
C       4.327700    1.975800   -2.006600
H       4.401800    2.371200   -3.013900
C       5.266800    2.342500   -1.041400
H       6.071700    3.023500   -1.295100
C       5.164100    1.827200    0.251200
H       5.890700    2.102600    1.007700
C       4.123100    0.958100    0.577900
H       4.060100    0.559800    1.585600
C       2.458400   -1.581600    1.308700
C       3.626900   -2.303300    1.009900
H       4.121900   -2.152200    0.055900
C       4.168300   -3.188900    1.939900
H       5.069200   -3.741900    1.697300
C       3.559700   -3.353700    3.187600
H       3.983200   -4.042300    3.910700
C       2.419400   -2.617500    3.508600
H       1.957800   -2.722900    4.484100
C       1.876400   -1.732000    2.575100
H       1.006100   -1.135000    2.832600
C      -0.553400    2.550600    1.787200
N      -1.368100    3.352700    2.131000
Ni      0.055200    0.989000    1.027700
C       1.641100    3.710300    0.727100
C       1.221600    2.640800    1.767400
H       2.719000    3.572200    0.554500
H       1.260900    3.036400    2.784700
H       1.923700    1.800300    1.766300
C       1.416500    5.122400    1.289500
H       1.711100    5.882000    0.556400
H       0.357600    5.264500    1.532400
H       2.003000    5.284000    2.201600
C       0.935400    3.558000   -0.630400
H       1.370400    4.251300   -1.360100
H       1.032800    2.543300   -1.026200
H      -0.131900    3.784800   -0.532400
102
TS13-14 Molecule Name
P       0.569100   -1.863100   -0.121600
P      -2.059200    1.127600   -0.229700
O      -1.503500   -0.890600    1.693700
C       0.357800   -2.391300    1.640300
C       1.203200   -3.275000    2.321300
H       2.050600   -3.710500    1.804000
C       0.968700   -3.600200    3.659900
H       1.633900   -4.288300    4.169100
C      -0.111700   -3.039300    4.340600
H      -0.288600   -3.283400    5.381900
C      -0.962800   -2.149700    3.683400
H      -1.798300   -1.684400    4.193400
C      -0.722600   -1.846600    2.348600
C      -2.798900   -1.129500    1.219500
C      -3.282300   -0.135900    0.352700
C      -4.572100   -0.309900   -0.162400
H      -4.971400    0.422300   -0.854000
C      -5.337200   -1.430400    0.169200
H      -6.330500   -1.546700   -0.249100
C      -4.814800   -2.405500    1.016700
H      -5.394900   -3.289100    1.258200
C      -3.534400   -2.259600    1.552300
H      -3.111600   -3.023000    2.193800
C      -0.838800   -2.789500   -0.861100
C      -1.703100   -2.176300   -1.775000
H      -1.496500   -1.172900   -2.121200
C      -2.829800   -2.854300   -2.243200
H      -3.499600   -2.356500   -2.934700
C      -3.095500   -4.153900   -1.817000
H      -3.975100   -4.675500   -2.178800
C      -2.228200   -4.782900   -0.920200
H      -2.426800   -5.796100   -0.587800
C      -1.111800   -4.103100   -0.440000
H      -0.456400   -4.589400    0.275700
C       2.081000   -2.767200   -0.644800
C       2.065700   -3.817400   -1.570100
H       1.125700   -4.164000   -1.983000
C       3.262000   -4.407000   -1.985600
H       3.237600   -5.210700   -2.713100
C       4.481200   -3.960000   -1.477600
H       5.407600   -4.421000   -1.802500
C       4.506300   -2.907800   -0.558400
H       5.450400   -2.544200   -0.166800
C       3.315900   -2.307300   -0.154000
H       3.343500   -1.466700    0.532400
C      -2.108200    2.429100    1.079800
C      -2.339800    2.136400    2.432000
H      -2.591400    1.125300    2.728400
C      -2.248000    3.135200    3.403400
H      -2.435300    2.889300    4.443500
C      -1.923100    4.443500    3.043800
H      -1.856600    5.218100    3.799900
C      -1.685400    4.747700    1.701400
H      -1.436900    5.762600    1.408500
C      -1.771100    3.750200    0.730200
H      -1.594200    4.002800   -0.310700
C      -2.972700    1.957200   -1.598900
C      -4.101900    2.776300   -1.419300
H      -4.476300    2.961300   -0.417100
C      -4.734900    3.358800   -2.515700
H      -5.605600    3.988600   -2.365500
C      -4.246000    3.134600   -3.806800
H      -4.738200    3.590800   -4.659300
C      -3.120700    2.333400   -3.995900
H      -2.727900    2.166000   -4.992600
C      -2.482700    1.749300   -2.897700
H      -1.591400    1.147300   -3.052800
C       2.569500    2.892700   -0.369600
C       1.430200    2.224000   -1.009700
H       1.635800    2.080300   -2.075900
H       0.503000    2.789500   -0.879000
C       2.415800    4.372400   -0.043900
H       3.102600    4.718000    0.734500
H       2.600600    4.955400   -0.954200
H       1.393000    4.570800    0.285300
C       0.745300   -0.100300   -2.354100
N       0.626800   -0.304000   -3.510800
Ni      0.952600    0.328600   -0.515400
C       1.351500    0.667700    1.438700
H       1.806200   -0.262200    1.801800
H       0.323200    0.737500    1.812300
C       3.946400    2.394500   -0.689600
C       5.089900    3.174300   -0.445600
C       4.121000    1.095200   -1.199400
C       6.364500    2.673000   -0.703800
H       4.993200    4.181700   -0.058100
C       5.395400    0.596000   -1.458900
H       3.251100    0.477200   -1.392300
C       6.522200    1.381000   -1.208900
H       7.234400    3.292000   -0.512600
H       5.500400   -0.406000   -1.860300
H       7.514800    0.992000   -1.409200
C       2.172800    1.811200    1.906000
C       1.437000    2.881300    2.700800
H       2.056700    3.767100    2.878800
H       0.520200    3.180100    2.186000
H       1.146600    2.464700    3.672800
C       3.560500    1.473800    2.435400
H       4.080900    0.795500    1.751500
H       4.174700    2.371600    2.565300
H       3.464800    0.977500    3.408900
H       2.458900    2.418100    0.878700
102
TS15-16 Molecule Name
P      -2.180100    0.061500    0.308100
P       1.743500   -0.964500   -0.101700
O      -0.701500   -1.860100   -1.292200
C      -2.858400   -0.849800   -1.152400
C      -4.143000   -0.684000   -1.682200
H      -4.822000    0.029800   -1.229900
C      -4.560000   -1.432000   -2.786600
H      -5.559500   -1.292000   -3.182300
C      -3.695900   -2.352100   -3.380100
H      -4.017800   -2.927100   -4.240800
C      -2.407800   -2.527200   -2.872000
H      -1.710600   -3.222200   -3.325300
C      -2.012300   -1.783000   -1.767200
C      -0.196700   -2.932200   -0.543000
C       1.057300   -2.687200    0.037600
C       1.616900   -3.717700    0.801300
H       2.573500   -3.560700    1.284900
C       0.949700   -4.931700    0.979200
H       1.402800   -5.711900    1.580200
C      -0.301800   -5.130600    0.399700
H      -0.833500   -6.063300    0.551200
C      -0.886600   -4.125500   -0.371500
H      -1.869300   -4.261500   -0.806100
C      -2.157700   -1.328200    1.514200
C      -1.046500   -1.592300    2.322000
H      -0.191400   -0.931800    2.301700
C      -1.037900   -2.704700    3.165100
H      -0.161500   -2.903500    3.770600
C      -2.139600   -3.555700    3.218300
H      -2.127800   -4.420300    3.873100
C      -3.259400   -3.294000    2.424800
H      -4.121900   -3.950500    2.463100
C      -3.265700   -2.192200    1.573700
H      -4.132900   -2.006000    0.948100
C      -3.575400    1.133900    0.832600
C      -4.216300    0.983200    2.067700
H      -3.930600    0.177900    2.733700
C      -5.204700    1.887300    2.461500
H      -5.685500    1.766700    3.425800
C      -5.563500    2.945500    1.627600
H      -6.329200    3.647900    1.938100
C      -4.922000    3.108700    0.397200
H      -5.186500    3.938100   -0.249800
C      -3.926800    2.215800    0.006200
H      -3.406600    2.366500   -0.934800
C       2.676000   -1.061000   -1.695900
C       2.151000   -1.736700   -2.809600
H       1.241400   -2.316000   -2.710100
C       2.779800   -1.659700   -4.052700
H       2.358100   -2.191300   -4.899600
C       3.943200   -0.904900   -4.211000
H       4.429200   -0.844500   -5.178700
C       4.479100   -0.233300   -3.111100
H       5.387700    0.349900   -3.217800
C       3.851800   -0.309800   -1.867300
H       4.278800    0.213700   -1.019900
C       3.078600   -0.988000    1.164600
C       4.289300   -1.693700    1.047900
H       4.495500   -2.262700    0.146400
C       5.231700   -1.654700    2.074000
H       6.165600   -2.197400    1.970900
C       4.974200   -0.916000    3.233400
H       5.709600   -0.886600    4.030700
C       3.779900   -0.207900    3.356000
H       3.581300    0.387000    4.240100
C       2.839800   -0.235000    2.323800
H       1.935300    0.360200    2.411100
C      -0.463100    1.533800    1.867500
N      -0.429700    1.558100    3.046200
Ni     -0.511000    1.539500   -0.033800
C      -0.705700    1.331500   -2.024300
H      -1.783900    1.300300   -2.226600
H      -0.295100    0.316000   -2.089400
C      -0.050200    2.210900   -3.016900
C       1.239700    1.714200   -3.643600
H       1.766800    2.510700   -4.179600
H       1.903500    1.285200   -2.889500
H       1.008200    0.915400   -4.358900
C      -0.961600    2.976500   -3.963300
H      -1.793900    3.431800   -3.416500
H      -0.422400    3.757500   -4.510000
H      -1.383100    2.276700   -4.696100
C       0.458800    3.491200   -0.086700
C       0.664500    4.026500   -1.422700
H       1.686700    4.245200   -1.744300
H      -0.050600    4.785500   -1.754200
C      -0.591200    4.331600    0.674900
H      -0.869900    3.898400    1.634900
H      -0.215700    5.350600    0.862000
H      -1.508600    4.412400    0.081500
C       1.758200    3.225800    0.629900
C       1.959100    3.604600    1.968800
C       2.849200    2.643900   -0.046500
C       3.196500    3.435500    2.589600
H       1.139000    4.022100    2.538000
C       4.090500    2.495300    0.568300
H       2.718700    2.292800   -1.066600
C       4.275700    2.893700    1.892200
H       3.314900    3.734900    3.626100
H       4.917900    2.058500    0.017200
H       5.237200    2.762700    2.376100
H       0.393000    3.158600   -2.291800
83
TS2-3 Molecule Name
P      -1.806500    0.102200   -0.185800
P       1.824500    0.062300   -0.211500
O       0.082800   -1.349400    1.843300
C      -2.269900   -1.044000    1.198400
C      -3.590500   -1.483600    1.388500
H      -4.382300   -1.058500    0.784500
C      -3.909100   -2.479000    2.313200
H      -4.940400   -2.792900    2.427000
C      -2.904500   -3.075600    3.072600
H      -3.142500   -3.858500    3.783500
C      -1.584300   -2.659800    2.909900
H      -0.773600   -3.107800    3.471900
C      -1.279600   -1.654900    1.996800
C       0.591500   -0.139400    2.345400
C       1.458400    0.600600    1.527800
C       1.941300    1.808900    2.056400
H       2.579900    2.436400    1.448900
C       1.603500    2.232300    3.340900
H       1.989300    3.174700    3.711600
C       0.773300    1.448800    4.140300
H       0.515900    1.767000    5.144300
C       0.262400    0.255800    3.638800
H      -0.398600   -0.362900    4.235000
C      -1.574100    1.737100    0.625300
C      -0.984300    2.753200   -0.144000
H      -0.685000    2.550200   -1.166800
C      -0.795200    4.022700    0.398200
H      -0.335500    4.797800   -0.204900
C      -1.190400    4.292800    1.710100
H      -1.035900    5.279500    2.133300
C      -1.783900    3.289600    2.476000
H      -2.088100    3.491300    3.497500
C      -1.977600    2.017100    1.936100
H      -2.427300    1.238600    2.543900
C      -3.394800    0.383700   -1.073600
C      -4.456400    1.106000   -0.503400
H      -4.351200    1.526900    0.491600
C      -5.637200    1.304200   -1.215900
H      -6.450800    1.863600   -0.767000
C      -5.766900    0.795000   -2.511100
H      -6.684400    0.955700   -3.066800
C      -4.708200    0.100700   -3.095100
H      -4.792400   -0.270000   -4.110500
C      -3.525400   -0.100700   -2.381200
H      -2.683000   -0.593900   -2.852700
C       3.035100   -1.309800    0.002900
C       3.161000   -2.066400    1.173000
H       2.580800   -1.813100    2.051400
C       4.023500   -3.164900    1.213600
H       4.108600   -3.744200    2.126800
C       4.773600   -3.514800    0.091500
H       5.443000   -4.367500    0.126500
C       4.663000   -2.757500   -1.078000
H       5.246400   -3.018700   -1.954400
C       3.797400   -1.666800   -1.123500
H       3.711600   -1.086500   -2.037600
C       2.953500    1.405400   -0.781800
C       4.258300    1.531000   -0.269700
H       4.622500    0.812000    0.457000
C       5.085800    2.569700   -0.688700
H       6.089200    2.656400   -0.285600
C       4.623200    3.496400   -1.628500
H       5.269800    4.302700   -1.958300
C       3.335800    3.374200   -2.147900
H       2.975300    4.078200   -2.889600
C       2.501800    2.333600   -1.728100
H       1.517300    2.228700   -2.166800
H       0.009500   -1.596100   -0.364200
C      -0.204300    0.659000   -2.834400
N      -0.328900    1.459700   -3.692900
Ni     -0.046300   -0.591800   -1.422800
C      -0.176000   -2.904900   -1.729400
C       0.165700   -2.178300   -2.857800
H      -0.584400   -1.891200   -3.586200
H       1.200700   -2.113700   -3.180300
C       0.848500   -3.751100   -0.995800
H       0.703200   -3.715500    0.087200
H       0.731700   -4.794200   -1.319600
H       1.868700   -3.436000   -1.215900
C      -1.613000   -3.320500   -1.476400
H      -1.832200   -3.356300   -0.405400
H      -2.327200   -2.645700   -1.952700
H      -1.768500   -4.329700   -1.880800
90
TS5-6 Molecule Name
P       2.106200    0.439000   -0.036600
P      -1.479300   -0.864700   -0.081800
O       0.548700   -1.216900    1.893200
C       2.573500    0.105700    1.723400
C       3.724000    0.588200    2.367300
H       4.424800    1.204200    1.815800
C       3.981600    0.295700    3.707200
H       4.876300    0.686300    4.178700
C       3.091000   -0.492600    4.437000
H       3.282400   -0.711800    5.481200
C       1.953000   -1.005300    3.816400
H       1.240600   -1.623100    4.349400
C       1.717600   -0.713700    2.476900
C       0.584000   -2.326400    1.041600
C      -0.426300   -2.364900    0.069300
C      -0.487100   -3.484200   -0.767400
H      -1.262000   -3.545200   -1.522700
C       0.452200   -4.511000   -0.651100
H       0.399600   -5.365000   -1.316500
C       1.462800   -4.430300    0.306800
H       2.206100   -5.215300    0.382900
C       1.529500   -3.336500    1.169200
H       2.311400   -3.260300    1.915300
C       3.026500   -0.939600   -0.863400
C       2.381500   -1.732500   -1.818000
H       1.356900   -1.522200   -2.090000
C       3.056200   -2.789900   -2.432300
H       2.538600   -3.393100   -3.169500
C       4.379100   -3.067400   -2.096300
H       4.901800   -3.890600   -2.572000
C       5.034000   -2.278500   -1.145500
H       6.066300   -2.485200   -0.883900
C       4.363400   -1.221600   -0.535500
H       4.882000   -0.617300    0.201100
C       3.115700    1.898900   -0.523900
C       3.511300    1.992300   -1.869400
H       3.332500    1.162000   -2.544200
C       4.108700    3.155400   -2.353200
H       4.401000    3.210900   -3.395900
C       4.321500    4.244900   -1.505900
H       4.786100    5.148200   -1.885400
C       3.924800    4.167000   -0.170800
H       4.080000    5.009300    0.495100
C       3.320100    3.006400    0.315200
H       3.008600    2.969000    1.353800
C      -2.364700   -0.881300    1.534500
C      -2.636000   -2.090700    2.193000
H      -2.292400   -3.026900    1.766000
C      -3.341300   -2.098600    3.395300
H      -3.538600   -3.040300    3.896100
C      -3.793700   -0.899700    3.951700
H      -4.344100   -0.907400    4.886500
C      -3.534800    0.305400    3.299400
H      -3.886400    1.242500    3.717100
C      -2.820700    0.313400    2.100200
H      -2.629100    1.254900    1.603500
C      -2.821300   -1.365700   -1.248100
C      -4.150200   -1.529700   -0.826400
H      -4.411600   -1.405100    0.217000
C      -5.152700   -1.840000   -1.746900
H      -6.174700   -1.959500   -1.403100
C      -4.844400   -1.996100   -3.098400
H      -5.624800   -2.237300   -3.812200
C      -3.526500   -1.832000   -3.528400
H      -3.275600   -1.937500   -4.577900
C      -2.523100   -1.511900   -2.614300
H      -1.515300   -1.343200   -2.974700
H      -0.614100    1.407100    0.622700
C       0.071100    0.500400   -2.546400
N       0.274800    0.262500   -3.684500
Ni     -0.228800    0.919000   -0.732100
C      -0.904000    2.934900   -0.083100
C      -0.208800    2.896000   -1.309600
H       0.832100    3.205200   -1.347700
H      -0.748500    2.948000   -2.246900
C      -0.224900    3.592700    1.111900
H      -0.605700    3.213800    2.064500
H       0.848500    3.408500    1.070400
H      -0.382800    4.677200    1.075300
C      -2.410600    2.951300   -0.107800
C      -3.138700    3.699500    0.827900
C      -3.122300    2.186000   -1.047600
C      -4.535600    3.667700    0.836600
H      -2.623000    4.304900    1.564200
C      -4.513100    2.148500   -1.034300
H      -2.578600    1.578400   -1.763700
C      -5.227500    2.886700   -0.087000
H      -5.079400    4.251500    1.571800
H      -5.034500    1.524000   -1.751400
H      -6.311200    2.848700   -0.068200
90
TS7-8 Molecule Name
P       0.728000    1.498100   -0.052500
P      -1.929300   -1.116400   -0.117400
O      -2.145500    1.538000   -1.078900
C      -0.055400    2.764600   -1.168400
C       0.628700    3.885000   -1.670100
H       1.671100    4.030100   -1.413100
C       0.000000    4.810000   -2.504200
H       0.558000    5.662100   -2.875300
C      -1.336600    4.635900   -2.863500
H      -1.825800    5.345500   -3.520900
C      -2.044600    3.542500   -2.369500
H      -3.083000    3.370600   -2.625800
C      -1.406100    2.637700   -1.527000
C      -2.692300    1.514800    0.207500
C      -2.810800    0.234700    0.761800
C      -3.405800    0.118300    2.022700
H      -3.509700   -0.860500    2.477100
C      -3.834100    1.255000    2.711800
H      -4.281700    1.152000    3.693500
C      -3.668200    2.520200    2.147400
H      -3.976900    3.404700    2.692600
C      -3.100900    2.659500    0.880100
H      -2.963900    3.636700    0.432700
C       0.354200    2.238400    1.595300
C      -0.063100    1.396700    2.634100
H      -0.119300    0.327700    2.466500
C      -0.403300    1.926700    3.879500
H      -0.730400    1.263100    4.671800
C      -0.325400    3.301000    4.099400
H      -0.591300    3.713600    5.066800
C       0.100800    4.147500    3.072500
H       0.169900    5.216900    3.241300
C       0.438900    3.619700    1.828300
H       0.760200    4.286000    1.034800
C       2.519000    1.844700   -0.292100
C       3.380900    1.915800    0.810500
H       2.982100    1.847800    1.814900
C       4.758300    2.039700    0.621000
H       5.412700    2.080500    1.484300
C       5.291900    2.097200   -0.666400
H       6.362200    2.198700   -0.809800
C       4.442700    2.009900   -1.772500
H       4.850600    2.037800   -2.777100
C       3.067700    1.873900   -1.586900
H       2.418800    1.795100   -2.454200
C      -2.895600   -1.369000   -1.659200
C      -4.214700   -0.926300   -1.823800
H      -4.707500   -0.392500   -1.017600
C      -4.891000   -1.158200   -3.021900
H      -5.910500   -0.807500   -3.141800
C      -4.257400   -1.836000   -4.065500
H      -4.783700   -2.013500   -4.997100
C      -2.942500   -2.278300   -3.910600
H      -2.443400   -2.798300   -4.721000
C      -2.264200   -2.040700   -2.715300
H      -1.235100   -2.369500   -2.603000
C      -2.394500   -2.585700    0.897300
C      -3.586100   -3.302600    0.714400
H      -4.273800   -3.016900   -0.074200
C      -3.891400   -4.386900    1.537600
H      -4.815000   -4.934900    1.384600
C      -3.012700   -4.765400    2.554800
H      -3.251700   -5.609300    3.193000
C      -1.823800   -4.059200    2.745200
H      -1.133400   -4.351200    3.528800
C      -1.513700   -2.978400    1.918600
H      -0.580600   -2.439800    2.061200
C       1.734000   -1.176200    0.960100
N       2.447500   -1.085600    1.907600
Ni      0.303500   -0.717600   -0.062300
C       2.360400   -2.720100   -1.234700
C       1.271000   -2.605900   -0.142900
H       2.207800   -3.717500   -1.678500
H       1.423800   -3.325200    0.662800
H       0.295500   -2.841400   -0.590100
C       2.136700   -1.688800   -2.350600
H       2.901400   -1.782400   -3.128400
H       1.152500   -1.828900   -2.812800
H       2.176900   -0.669400   -1.953500
C       3.776400   -2.714200   -0.679800
C       4.539000   -1.544700   -0.587600
C       4.336200   -3.914600   -0.224200
C       5.826000   -1.575400   -0.052400
H       4.124400   -0.597500   -0.910900
C       5.622000   -3.949400    0.314600
H       3.756000   -4.831800   -0.291500
C       6.373000   -2.776100    0.400400
H       6.392500   -0.653200    0.020600
H       6.036900   -4.888800    0.665000
H       7.372600   -2.797800    0.821500
90
TS9-10 Molecule Name
P      -2.000400   -0.540100    0.143400
P       1.376100    1.107100    0.018500
O      -0.772000    1.436400   -1.725500
C      -2.763800    0.208500   -1.364900
C      -4.095700   -0.060300   -1.715400
H      -4.660600   -0.780700   -1.135400
C      -4.706700    0.585700   -2.788400
H      -5.735100    0.356600   -3.041900
C      -3.997400    1.542000   -3.515200
H      -4.473700    2.072300   -4.332200
C      -2.675200    1.832100   -3.186700
H      -2.135100    2.606200   -3.715800
C      -2.060400    1.142300   -2.139900
C       0.371100    1.520700   -2.517700
C       1.548700    1.553100   -1.754400
C       2.765800    1.714500   -2.420700
H       3.688400    1.746400   -1.853200
C       2.806500    1.801200   -3.813900
H       3.757600    1.921800   -4.319300
C       1.627800    1.698200   -4.549000
H       1.658200    1.718900   -5.632600
C       0.396100    1.558100   -3.906100
H      -0.507500    1.440300   -4.486900
C      -2.991000   -2.094400    0.253500
C      -2.744700   -3.070200   -0.730000
H      -2.000300   -2.885000   -1.499100
C      -3.439100   -4.277500   -0.712900
H      -3.238900   -5.019900   -1.477600
C      -4.379500   -4.535000    0.288700
H      -4.913600   -5.479000    0.304100
C      -4.628300   -3.573500    1.266900
H      -5.361300   -3.763300    2.043800
C      -3.942900   -2.355400    1.247400
H      -4.160700   -1.610400    2.004100
C      -2.715700    0.515300    1.477500
C      -2.436800    0.168000    2.810900
H      -1.834900   -0.710700    3.021600
C      -2.922200    0.935800    3.866700
H      -2.708300    0.644400    4.889500
C      -3.675100    2.083800    3.605700
H      -4.047200    2.689100    4.425300
C      -3.937200    2.451300    2.287100
H      -4.506900    3.349500    2.075700
C      -3.468600    1.669400    1.229000
H      -3.685100    1.968700    0.210500
C       0.537900    2.558300    0.778900
C       0.384600    3.780900    0.111700
H       0.757400    3.892800   -0.900600
C      -0.248200    4.854200    0.739900
H      -0.367500    5.793100    0.209600
C      -0.724000    4.722800    2.045600
H      -1.217200    5.557800    2.531700
C      -0.565200    3.512700    2.721900
H      -0.944400    3.395000    3.730400
C       0.055000    2.436700    2.089100
H       0.150700    1.490900    2.611800
C       3.101700    1.298400    0.634700
C       3.544700    2.432900    1.331500
H       2.855400    3.241400    1.546800
C       4.872000    2.530400    1.750900
H       5.200400    3.411800    2.291300
C       5.774900    1.503900    1.469400
H       6.807800    1.584600    1.791400
C       5.344300    0.373500    0.773100
H       6.033700   -0.432900    0.551500
C       4.014400    0.265600    0.366200
H       3.686300   -0.620000   -0.168200
C       0.357200   -1.544700   -1.522900
N       0.303300   -1.948200   -2.630900
Ni      0.292300   -0.922400    0.250600
H       0.193700   -0.480200    1.659300
C       0.789000   -2.014200    2.083500
C       1.167500   -2.802700    0.990300
H       1.545400   -1.499900    2.669900
H      -0.120300   -2.269000    2.621800
C       2.616200   -2.940700    0.628000
C       3.017000   -3.180200   -0.697100
C       3.603000   -2.920300    1.626300
C       4.362800   -3.356000   -1.012900
H       2.275000   -3.184100   -1.486000
C       4.949700   -3.103600    1.311000
H       3.319200   -2.777400    2.663500
C       5.336900   -3.316800   -0.011800
H       4.649300   -3.521300   -2.045900
H       5.693300   -3.082600    2.100700
H       6.383300   -3.460900   -0.259400
C       0.277100   -3.951900    0.549600
H       0.279700   -4.073500   -0.535500
H       0.645600   -4.885400    0.996000
H      -0.756300   -3.795100    0.866000
100
LAN-10 Molecule Name
P       1.571500    1.324500   -0.711300
P      -2.344400    0.528000    0.221800
O       0.142000    0.322700    1.547500
C       2.250700    1.182600    0.979800
C       3.545100    1.584700    1.330700
H       4.207600    1.984100    0.571300
C       3.992500    1.456200    2.645000
H       5.004500    1.745400    2.901000
C       3.138100    0.947500    3.623300
H       3.483600    0.839900    4.644400
C       1.841400    0.553300    3.299200
H       1.180900    0.159300    4.059700
C       1.421200    0.650200    1.976400
C      -0.634700   -0.744500    2.006800
C      -1.961300   -0.691700    1.551400
C      -2.835000   -1.696400    1.981600
H      -3.865700   -1.685000    1.647900
C      -2.383600   -2.732800    2.802300
H      -3.076300   -3.500200    3.129200
C      -1.039900   -2.795400    3.170000
H      -0.666600   -3.622600    3.762600
C      -0.147700   -1.797000    2.772200
H       0.903200   -1.878900    3.025800
C       3.086900    1.536700   -1.731100
C       3.858200    0.389300   -1.986200
H       3.554100   -0.572200   -1.586400
C       5.036500    0.481400   -2.724100
H       5.630300   -0.409200   -2.895300
C       5.450600    1.715900   -3.229800
H       6.366500    1.787100   -3.806200
C       4.688000    2.858300   -2.984900
H       5.008800    3.819400   -3.371700
C       3.513200    2.773400   -2.234200
H       2.935100    3.669800   -2.038900
C       0.780200    2.978100   -0.758300
C       0.113900    3.358400   -1.933600
H       0.043000    2.663500   -2.765500
C      -0.435300    4.633200   -2.055500
H      -0.937300    4.919600   -2.973200
C      -0.338400    5.536400   -0.995200
H      -0.769500    6.527400   -1.085800
C       0.298400    5.156700    0.186000
H       0.353000    5.846700    1.020100
C       0.858400    3.884400    0.306300
H       1.354100    3.598900    1.226700
C      -2.423500    2.144000    1.109800
C      -2.118700    2.310700    2.466800
H      -1.819300    1.455900    3.062100
C      -2.208400    3.569600    3.064000
H      -1.968700    3.682700    4.116000
C      -2.620200    4.674200    2.317900
H      -2.701300    5.649100    2.786600
C      -2.927900    4.518000    0.965100
H      -3.240900    5.372400    0.374900
C      -2.817200    3.266300    0.363500
H      -3.039700    3.158900   -0.694100
C      -4.141700    0.184300   -0.039700
C      -5.169900    0.781300    0.706400
H      -4.928100    1.510600    1.471600
C      -6.502700    0.442700    0.470500
H      -7.288000    0.913700    1.052100
C      -6.826500   -0.504100   -0.504400
H      -7.863700   -0.767400   -0.682300
C      -5.811400   -1.109400   -1.246400
H      -6.048300   -1.852500   -2.000000
C      -4.479500   -0.761100   -1.020300
H      -3.697300   -1.241700   -1.597900
C      -0.776600   -0.438900   -3.268500
C      -0.372300   -1.758800   -2.669000
H      -1.855200   -0.275400   -3.289800
C       1.379500   -1.698600   -0.474100
N       2.116400   -2.365800    0.150300
Ni      0.418200   -0.489000   -1.465200
H      -0.314800   -0.225200   -4.235100
C      -1.506100   -2.640700   -2.212900
C      -1.594700   -3.180800   -0.924400
C      -2.500000   -2.980500   -3.149500
C      -2.654800   -4.022100   -0.579000
H      -0.846500   -2.931100   -0.181500
C      -3.558700   -3.819000   -2.804600
H      -2.437800   -2.582200   -4.158700
C      -3.640700   -4.340400   -1.511600
H      -2.707700   -4.417900    0.428500
H      -4.314000   -4.067200   -3.543000
H      -4.463700   -4.990500   -1.235600
C       0.712500   -2.520500   -3.428300
H       1.093000   -3.347000   -2.822900
H       0.304200   -2.943900   -4.357700
H       1.553700   -1.868300   -3.689000
C       5.167900   -2.153900    0.402700
H       5.320400   -2.284800   -0.678400
H       4.985900   -1.088400    0.596700
H       6.104500   -2.426300    0.905200
C       3.447200   -5.171900    0.650900
H       2.450000   -5.527000    0.940400
H       3.577100   -5.369600   -0.421800
H       4.184200   -5.776200    1.194600
Cl      3.253300   -2.828700    3.232800
Al      3.645000   -3.246400    1.052700
H      -0.425000    0.464300   -2.609300
100
LAN-11 Molecule Name
P       1.641600    1.238300   -0.452800
P      -1.941400    0.345800    0.424100
O      -0.727100    2.927600    0.388200
C       1.466400    3.062600   -0.645300
C       2.439600    3.871700   -1.252200
H       3.355100    3.418700   -1.616100
C       2.237400    5.242900   -1.412800
H       3.002900    5.846400   -1.886900
C       1.051700    5.832000   -0.971200
H       0.887900    6.895300   -1.103500
C       0.074800    5.051500   -0.354400
H      -0.856100    5.476300    0.000600
C       0.294200    3.688000   -0.191100
C      -0.567200    2.393800    1.678100
C      -1.193200    1.160700    1.900500
C      -1.113700    0.616100    3.187300
H      -1.588600   -0.335300    3.395600
C      -0.403100    1.269000    4.196400
H      -0.335200    0.820600    5.180600
C       0.233200    2.481900    3.934100
H       0.803000    2.979200    4.710300
C       0.144200    3.060000    2.668100
H       0.633600    4.001900    2.449800
C       2.467400    1.058400    1.174200
C       2.120400   -0.009400    2.008700
H       1.353000   -0.708200    1.705500
C       2.765200   -0.189300    3.232200
H       2.501100   -1.036800    3.853600
C       3.750300    0.707600    3.638200
H       4.255100    0.566400    4.587400
C       4.097000    1.783500    2.815700
H       4.866700    2.481000    3.127400
C       3.464400    1.956400    1.587500
H       3.743600    2.791000    0.953100
C       2.924300    0.770900   -1.677600
C       3.911900   -0.158500   -1.326500
H       4.017800   -0.502400   -0.303200
C       4.749900   -0.694800   -2.305700
H       5.489000   -1.431800   -2.014300
C       4.617300   -0.302000   -3.637300
H       5.269000   -0.721200   -4.396100
C       3.636700    0.628500   -3.994600
H       3.528700    0.936700   -5.029300
C       2.786700    1.154500   -3.023400
H       2.017500    1.865600   -3.312100
C      -3.399300    1.442400    0.162000
C      -4.249400    1.802900    1.219300
H      -4.063800    1.412800    2.215000
C      -5.324300    2.663200    1.001200
H      -5.975200    2.932900    1.825700
C      -5.557200    3.183900   -0.274300
H      -6.391400    3.856500   -0.442200
C      -4.707200    2.847000   -1.327600
H      -4.873400    3.261400   -2.316000
C      -3.633800    1.982800   -1.106500
H      -2.958800    1.743200   -1.918200
C      -2.655000   -1.191300    1.143500
C      -4.028400   -1.451200    1.224700
H      -4.744000   -0.722900    0.863400
C      -4.490400   -2.658800    1.752700
H      -5.557900   -2.844500    1.804000
C      -3.590200   -3.620800    2.207400
H      -3.953300   -4.554600    2.622900
C      -2.217300   -3.379200    2.118700
H      -1.502600   -4.119100    2.460600
C      -1.755500   -2.179800    1.582900
H      -0.686400   -2.020000    1.500800
C      -0.862500    0.329000   -3.173400
C      -0.856700   -1.096300   -2.675400
C       0.832400   -1.684700   -0.619000
N       1.423800   -2.605700   -0.191000
Ni     -0.077000   -0.168600   -1.128200
H      -0.122300    0.487600   -3.959200
H      -1.835100    0.697500   -3.500700
C      -2.158200   -1.763200   -2.337900
C      -2.138000   -3.029300   -1.721200
C      -3.412300   -1.199000   -2.618300
C      -3.315200   -3.701100   -1.411700
H      -1.188500   -3.476300   -1.449900
C      -4.595500   -1.870500   -2.304300
H      -3.490100   -0.232800   -3.101800
C      -4.553500   -3.126800   -1.705300
H      -3.264900   -4.664800   -0.917900
H      -5.548500   -1.405700   -2.534100
H      -5.471500   -3.647500   -1.456400
C       0.127500   -1.979600   -3.444200
H       0.280700   -2.947900   -2.966500
H      -0.262600   -2.163000   -4.455600
H       1.103600   -1.491900   -3.529700
Al      2.456100   -3.930600    0.833600
C       1.596200   -3.891500    2.629100
H       2.329700   -4.102700    3.417600
H       1.146700   -2.913300    2.850800
H       0.805300   -4.650700    2.702600
C       2.475300   -5.578000   -0.258500
H       1.458000   -5.965200   -0.408900
H       2.912300   -5.384200   -1.246100
H       3.067600   -6.371500    0.214600
Cl      4.475400   -2.940100    0.907700
H      -0.586300    1.081800   -2.347900
100
LAN-12 Molecule Name
P       2.215800   -0.133700   -0.091800
P      -1.052100    1.490300    0.062100
O       1.078100    2.240700   -1.725400
C       2.895400    0.622500   -1.649700
C       4.045600    0.118600   -2.278600
H       4.565100   -0.723700   -1.838300
C       4.523500    0.667300   -3.469400
H       5.411900    0.251500   -3.930600
C       3.855200    1.734700   -4.067400
H       4.216300    2.157300   -4.997900
C       2.714300    2.258900   -3.461800
H       2.165800    3.084000   -3.900000
C       2.257300    1.708200   -2.269200
C       1.132400    3.073400   -0.597200
C       0.084300    2.922200    0.316600
C       0.075500    3.763300    1.435800
H      -0.705100    3.660000    2.179300
C       1.087100    4.703300    1.632400
H       1.071100    5.333600    2.514000
C       2.127900    4.815100    0.710500
H       2.924300    5.532700    0.870700
C       2.152000    4.000600   -0.419900
H       2.956400    4.069500   -1.142700
C       2.931700    0.951100    1.209300
C       2.213200    1.126400    2.398600
H       1.242200    0.656900    2.514700
C       2.730300    1.912900    3.428700
H       2.161700    2.043100    4.342800
C       3.968900    2.535400    3.277000
H       4.369600    3.149700    4.076100
C       4.690700    2.371100    2.092400
H       5.653000    2.856200    1.969700
C       4.175700    1.584100    1.064200
H       4.737400    1.464700    0.143400
C       3.232200   -1.660000    0.003500
C       4.360600   -1.788500    0.824200
H       4.663000   -0.974400    1.472400
C       5.094600   -2.975600    0.826100
H       5.959300   -3.069600    1.474100
C       4.711800   -4.040000    0.009000
H       5.276400   -4.965700    0.020800
C       3.584800   -3.921700   -0.806700
H       3.249100   -4.757100   -1.408400
C       2.846100   -2.740200   -0.805900
H       1.948200   -2.674100   -1.411900
C      -2.344100    2.149700   -1.076000
C      -1.966100    2.899800   -2.202300
H      -0.922900    3.135600   -2.372300
C      -2.923300    3.320400   -3.124300
H      -2.615200    3.898100   -3.989100
C      -4.269400    2.998900   -2.939500
H      -5.011900    3.326500   -3.659000
C      -4.651500    2.249300   -1.828000
H      -5.690700    1.980200   -1.675900
C      -3.697900    1.823400   -0.902600
H      -4.017600    1.227200   -0.056300
C      -1.899000    1.369400    1.694400
C      -2.861200    2.289900    2.139100
H      -3.152900    3.116700    1.499800
C      -3.460300    2.139100    3.389700
H      -4.208100    2.853100    3.716800
C      -3.101800    1.071900    4.216800
H      -3.571100    0.955500    5.187600
C      -2.143100    0.152700    3.788400
H      -1.864800   -0.684600    4.418700
C      -1.549500    0.300800    2.534500
H      -0.828100   -0.438800    2.195000
C      -2.459100   -1.146200   -2.868500
C      -2.590200   -1.959800   -1.557800
H      -2.458900   -0.071900   -2.668700
C      -1.328600   -1.706600   -0.774300
N      -0.428200   -2.358200   -0.224300
Ni     -0.021800   -0.457400   -0.252400
H      -1.523800   -1.408900   -3.372800
H      -3.281500   -1.381000   -3.550000
C      -3.810200   -1.529000   -0.736900
C      -3.739800   -1.424000    0.656200
C      -5.035200   -1.266300   -1.363500
C      -4.845900   -1.019400    1.404600
H      -2.813300   -1.653700    1.166900
C      -6.148100   -0.877500   -0.618500
H      -5.126300   -1.351600   -2.440400
C      -6.054500   -0.737300    0.768300
H      -4.753100   -0.921300    2.480500
H      -7.088300   -0.679000   -1.122500
H      -6.917200   -0.422500    1.345300
C      -2.687300   -3.469300   -1.887700
H      -2.768400   -4.064800   -0.976300
H      -3.574200   -3.650200   -2.503600
H      -1.798200   -3.805000   -2.429600
Al     -0.062400   -3.929900    0.937000
C       1.403400   -3.463000    2.187300
H       2.386700   -3.817900    1.861200
H       1.471900   -2.372500    2.316300
H       1.195900   -3.903000    3.172500
C      -1.807100   -4.245400    1.844700
H      -2.000800   -3.455400    2.586400
H      -2.672900   -4.291700    1.174300
H      -1.763800   -5.198200    2.390200
Cl      0.394900   -5.522200   -0.577600
112
LAN-13 Molecule Name
P      -1.900900   -0.740700    0.883900
P       0.330800    2.097200   -0.590500
O      -2.114900    2.275200    1.076200
C      -3.021700    0.213800    1.994000
C      -3.909300   -0.384700    2.900000
H      -3.963300   -1.465700    2.957900
C      -4.718600    0.387200    3.735200
H      -5.395500   -0.101600    4.426300
C      -4.650500    1.779200    3.685100
H      -5.268800    2.382000    4.340100
C      -3.785400    2.398100    2.783300
H      -3.707300    3.476600    2.718000
C      -2.997600    1.618100    1.944400
C      -2.445500    2.463200   -0.270900
C      -1.365800    2.555700   -1.161700
C      -1.664400    2.823900   -2.506000
H      -0.858800    2.905200   -3.225000
C      -2.982600    2.952300   -2.941900
H      -3.185300    3.143500   -3.989100
C      -4.033400    2.813100   -2.036000
H      -5.060700    2.887000   -2.373400
C      -3.767500    2.578600   -0.689000
H      -4.574300    2.471700    0.026100
C      -2.924000   -0.850900   -0.642900
C      -2.374700   -0.604100   -1.905000
H      -1.331600   -0.338900   -2.000800
C      -3.164600   -0.696700   -3.051200
H      -2.718600   -0.514500   -4.021600
C      -4.511900   -1.032900   -2.945600
H      -5.123900   -1.111400   -3.837300
C      -5.071000   -1.280700   -1.689100
H      -6.118100   -1.549200   -1.601700
C      -4.283000   -1.192800   -0.545100
H      -4.726500   -1.391100    0.424800
C      -1.893200   -2.459300    1.515500
C      -1.884700   -3.508600    0.583800
H      -2.006900   -3.316900   -0.477200
C      -1.683700   -4.822200    1.008000
H      -1.661600   -5.612900    0.267000
C      -1.499400   -5.102200    2.362400
H      -1.343400   -6.124200    2.690300
C      -1.504200   -4.062300    3.295300
H      -1.350000   -4.272600    4.348000
C      -1.688200   -2.745500    2.875300
H      -1.654700   -1.943500    3.606100
C       0.945800    3.551800    0.342300
C       0.152400    4.647900    0.697000
H      -0.888900    4.684200    0.399100
C       0.699400    5.700900    1.435000
H       0.075600    6.545400    1.707300
C       2.041200    5.672000    1.815600
H       2.463000    6.493500    2.384200
C       2.840100    4.581200    1.462100
H       3.884000    4.548700    1.755300
C       2.293700    3.524300    0.738000
H       2.911800    2.670200    0.473800
C       1.279300    2.229500   -2.168000
C       1.918300    3.414800   -2.565000
H       1.870300    4.294900   -1.934000
C       2.624800    3.470300   -3.767300
H       3.119700    4.391300   -4.055900
C       2.691600    2.348700   -4.595800
H       3.243000    2.392600   -5.528600
C       2.045900    1.169900   -4.219600
H       2.091900    0.289400   -4.850700
C       1.347700    1.110700   -3.013600
H       0.876200    0.178400   -2.728700
C       0.595000   -1.248500   -0.708300
N       0.843600   -2.124200   -1.450400
Ni      0.148800    0.053300    0.593800
C       0.150100    0.823900    2.361600
H      -0.605200    0.462500    3.063200
H       0.163200    1.914200    2.346800
C       1.511300    0.165500    2.536800
H       1.966600    0.013400    1.511600
C       2.500700    1.075200    3.290300
H       3.489300    0.607200    3.333800
H       2.587700    2.055000    2.815700
H       2.144300    1.224600    4.316300
C       1.439600   -1.221400    3.192600
H       0.819500   -1.909700    2.612100
H       2.438600   -1.660200    3.274900
H       1.013300   -1.138200    4.200800
Al      1.061200   -3.565800   -2.767300
C       2.240600   -4.884000   -1.880900
H       2.362400   -5.796300   -2.477600
H       3.241300   -4.466900   -1.700900
H       1.811400   -5.176500   -0.913400
C       1.582300   -2.576300   -4.405600
H       0.819800   -1.824300   -4.651700
H       2.541600   -2.061100   -4.253800
H       1.688100   -3.235600   -5.275600
Cl     -1.062600   -4.297700   -2.897300
C       4.595400    0.262300    0.225200
C       3.923700    0.442500   -0.924300
H       3.297500   -0.316700   -1.377000
H       3.984700    1.380500   -1.467100
C       5.428100    1.394400    0.788300
H       5.055600    1.714900    1.769900
H       6.476500    1.100100    0.914400
H       5.401300    2.258600    0.118800
C       4.565000   -1.020600    0.989500
C       5.245500   -1.142900    2.212900
C       3.865100   -2.147300    0.518400
C       5.223500   -2.335600    2.938600
H       5.803200   -0.303700    2.612000
C       3.839700   -3.336500    1.241000
H       3.331700   -2.109600   -0.422600
C       4.519900   -3.438100    2.457100
H       5.759000   -2.399100    3.880000
H       3.291500   -4.184000    0.845100
H       4.502300   -4.366200    3.017700
112
LAN-14 Molecule Name
P       0.301800   -1.272900    1.177500
P      -2.121000    0.188900   -1.034700
O      -2.656300   -0.628700    1.731400
C      -0.624600   -1.426300    2.773400
C       0.015000   -1.844200    3.952700
H       1.051700   -2.154800    3.912200
C      -0.653700   -1.842100    5.176700
H      -0.133900   -2.167200    6.070200
C      -1.977900   -1.408700    5.253500
H      -2.492200   -1.384300    6.207200
C      -2.641600   -1.008900    4.095200
H      -3.668800   -0.665600    4.116100
C      -1.966900   -1.042900    2.880400
C      -3.152600   -1.610800    0.856000
C      -3.020400   -1.338900   -0.507400
C      -3.490000   -2.311900   -1.402400
H      -3.374500   -2.163100   -2.467700
C      -4.084500   -3.486000   -0.940800
H      -4.428500   -4.226200   -1.653300
C      -4.229800   -3.707700    0.428000
H      -4.697500   -4.616400    0.789300
C      -3.760800   -2.763900    1.338400
H      -3.848400   -2.925600    2.406200
C       0.084800   -2.880800    0.327800
C       0.673400   -3.023100   -0.940900
H       1.285200   -2.230200   -1.358300
C       0.532500   -4.214100   -1.649700
H       1.023900   -4.319800   -2.609600
C      -0.216000   -5.263500   -1.112600
H      -0.331700   -6.188000   -1.667800
C      -0.799700   -5.128700    0.147500
H      -1.373900   -5.944800    0.572600
C      -0.640000   -3.947300    0.872200
H      -1.086500   -3.856800    1.855900
C       2.031200   -1.288900    1.788800
C       2.929500   -2.323700    1.514100
H       2.619200   -3.189200    0.941900
C       4.259600   -2.221000    1.928500
H       4.958400   -3.006700    1.667700
C       4.690600   -1.100500    2.634600
H       5.728000   -1.016500    2.938000
C       3.794500   -0.064800    2.914600
H       4.132800    0.819800    3.441900
C       2.475800   -0.150600    2.482200
H       1.794800    0.677300    2.658000
C      -3.325600    1.569100   -0.776900
C      -4.130500    1.626800    0.372700
H      -4.082000    0.838800    1.111200
C      -4.975000    2.714600    0.595300
H      -5.586100    2.738600    1.490800
C      -5.026000    3.768800   -0.316000
H      -5.678500    4.616100   -0.136800
C      -4.231700    3.724000   -1.461600
H      -4.264500    4.533100   -2.182800
C      -3.393800    2.632800   -1.694500
H      -2.808900    2.609200   -2.606200
C      -2.093900   -0.040200   -2.859400
C      -3.247000    0.095100   -3.650200
H      -4.185500    0.391500   -3.192900
C      -3.193800   -0.151300   -5.021400
H      -4.089100   -0.039300   -5.623000
C      -1.991800   -0.541700   -5.617300
H      -1.951300   -0.730600   -6.684400
C      -0.842800   -0.684100   -4.839000
H       0.094500   -0.982400   -5.294500
C      -0.892900   -0.433000   -3.467300
H       0.008700   -0.525600   -2.871000
C       0.422900    3.253300   -0.684400
C       0.082900    2.035700   -1.567400
H       0.826400    1.884300   -2.356700
H      -0.874400    2.208000   -2.064300
C      -0.041900    4.555600   -1.374100
H       0.222700    5.430700   -0.770000
H       0.429800    4.666500   -2.357400
H      -1.128900    4.545200   -1.513400
C       1.841600    0.360500   -0.686000
N       2.933100    0.133100   -1.047300
Ni      0.012600    0.455600   -0.372800
C       1.896700    3.320600   -0.318900
C       2.881900    3.441300   -1.307700
C       2.299900    3.228100    1.017600
C       4.234300    3.431400   -0.972600
H       2.592800    3.504900   -2.352700
C       3.653600    3.230400    1.359000
H       1.542000    3.126300    1.789300
C       4.625900    3.320800    0.364200
H       4.985200    3.494100   -1.752900
H       3.947500    3.149600    2.400600
H       5.678900    3.293700    0.621300
H      -0.139500    3.167400    0.252700
Al      4.664900   -0.406500   -1.789800
C       6.065400    0.014100   -0.450800
H       6.599700   -0.886400   -0.124300
H       6.802500    0.720200   -0.856200
H       5.602000    0.473400    0.431100
C       4.668400    0.410600   -3.596800
H       3.766900    0.120900   -4.152600
H       4.682000    1.507100   -3.524800
H       5.538500    0.100800   -4.189600
Cl      4.237400   -2.630400   -1.935000
C      -1.060600    2.143700    2.689100
H      -0.500100    1.520700    3.381700
H      -1.631200    1.627000    1.922800
C      -1.061500    3.479500    2.790300
C      -1.844500    4.359400    1.846700
H      -1.184800    5.094600    1.368100
H      -2.336000    3.779600    1.061200
H      -2.614400    4.922600    2.389900
C      -0.262700    4.206500    3.844200
H       0.260800    3.512000    4.507600
H       0.483700    4.860800    3.374500
H      -0.910500    4.846800    4.456100
112
LAN-15 Molecule Name 
P       1.550000   -1.499000   -0.394300
P       0.377200    2.156800    0.372200
O       3.113200    1.079900   -0.211200
C       3.311200   -1.245600   -0.882400
C       4.126900   -2.257200   -1.410400
H       3.722200   -3.254100   -1.541300
C       5.448600   -2.001200   -1.778100
H       6.056900   -2.801800   -2.182800
C       5.981500   -0.720700   -1.631200
H       7.004400   -0.516200   -1.925300
C       5.195200    0.299100   -1.096200
H       5.579000    1.303600   -0.965600
C       3.885700    0.025600   -0.717100
C       2.939900    1.237700    1.169500
C       1.758800    1.875200    1.578200
C       1.608200    2.114500    2.953500
H       0.712400    2.601600    3.316000
C       2.572800    1.704100    3.872200
H       2.419700    1.889600    4.928800
C       3.715500    1.037400    3.433200
H       4.456700    0.692000    4.144400
C       3.908700    0.811000    2.073100
H       4.793300    0.296900    1.717600
C       1.736900   -1.915200    1.389000
C       0.956100   -1.291200    2.366600
H       0.216200   -0.555800    2.085100
C       1.119900   -1.611100    3.714100
H       0.496600   -1.126100    4.455800
C       2.064800   -2.558800    4.097100
H       2.185600   -2.814100    5.144000
C       2.848100   -3.191400    3.128100
H       3.578700   -3.937700    3.420300
C       2.685600   -2.873300    1.783200
H       3.295500   -3.374700    1.038900
C       1.045900   -3.089200   -1.153100
C       0.211200   -3.941900   -0.414600
H      -0.022700   -3.735500    0.624900
C      -0.351600   -5.067400   -1.017000
H      -1.002800   -5.704100   -0.429100
C      -0.082600   -5.358300   -2.354800
H      -0.521600   -6.233700   -2.820800
C       0.751600   -4.516800   -3.094900
H       0.962900   -4.735600   -4.136000
C       1.307900   -3.383800   -2.501600
H       1.938100   -2.728100   -3.094400
C       0.858500    3.660400   -0.571100
C       2.176800    4.120300   -0.667700
H       2.970700    3.610100   -0.137000
C       2.478700    5.235000   -1.454200
H       3.504500    5.580700   -1.521400
C       1.469700    5.904000   -2.146100
H       1.707300    6.770600   -2.753100
C       0.150200    5.454400   -2.052300
H      -0.641700    5.969600   -2.584900
C      -0.151300    4.338100   -1.275600
H      -1.179800    3.995000   -1.203700
C      -0.908200    2.832400    1.512000
C      -0.954000    4.194500    1.858200
H      -0.263500    4.893900    1.401300
C      -1.876100    4.657700    2.795800
H      -1.903300    5.712800    3.045700
C      -2.750600    3.764700    3.419500
H      -3.461100    4.123400    4.156300
C      -2.705600    2.410100    3.092400
H      -3.377400    1.704500    3.567700
C      -1.800000    1.947900    2.135700
H      -1.809400    0.897700    1.874000
C      -1.293900   -0.734900    0.092500
N      -2.090800   -1.378800    0.666300
Ni      0.100500    0.147500   -0.850800
Al     -3.244100   -2.432500    1.855400
Cl     -1.743800   -3.934100    2.621600
C      -3.706600   -1.140500    3.288200
H      -4.290200   -1.607200    4.091200
H      -2.791900   -0.731400    3.739100
H      -4.292200   -0.306400    2.878700
C      -4.605400   -3.363800    0.757600
H      -4.844300   -4.339900    1.197700
H      -5.541900   -2.796500    0.678800
H      -4.224700   -3.543800   -0.256600
C       1.144300    0.750000   -2.360400
H       1.939700    0.081200   -2.693800
H       1.533100    1.760800   -2.239600
C      -0.135100    0.635100   -3.172600
C      -0.496900    1.936500   -3.905900
H      -1.470000    1.841000   -4.399600
H      -0.527200    2.784300   -3.218100
H       0.260100    2.149900   -4.669300
C      -0.120500   -0.558900   -4.137000
H       0.005600   -1.500900   -3.598500
H      -1.058300   -0.612000   -4.696600
H       0.703900   -0.450600   -4.852500
C      -3.617100   -0.447600   -3.165000
C      -3.701500    0.133800   -4.371200
H      -4.083400    1.143000   -4.491200
H      -3.418400   -0.393600   -5.277200
C      -3.128100   -1.865900   -2.985200
H      -2.252400   -1.895900   -2.326100
H      -3.892300   -2.496600   -2.516900
H      -2.857900   -2.316500   -3.943900
C      -4.002700    0.295800   -1.931200
C      -4.828200   -0.301200   -0.969300
C      -3.546900    1.604500   -1.705500
C      -5.203400    0.393800    0.178700
H      -5.184900   -1.313800   -1.116800
C      -3.913200    2.296900   -0.551500
H      -2.891100    2.070900   -2.434400
C      -4.747000    1.694900    0.391900
H      -5.845400   -0.086700    0.909300
H      -3.539600    3.300900   -0.376400
H      -5.023900    2.231400    1.292100
H      -1.000500    0.446600   -2.454600
112
LAN-16 Molecule Name
P      -1.317600   -1.643400   -0.147200
P       1.309600    0.788000    1.168600
O       1.203600   -2.136800    1.406900
C      -0.522600   -3.279100    0.148800
C      -1.016400   -4.489100   -0.361100
H      -1.922700   -4.483900   -0.956200
C      -0.350900   -5.692600   -0.124000
H      -0.750200   -6.615000   -0.529600
C       0.824600   -5.707700    0.628400
H       1.346400   -6.640700    0.808100
C       1.329600   -4.518200    1.152800
H       2.244600   -4.494600    1.732300
C       0.653000   -3.328000    0.912000
C       0.666500   -1.550400    2.568800
C       0.779600   -0.157800    2.660300
C       0.298200    0.450800    3.827900
H       0.362600    1.526900    3.933100
C      -0.297400   -0.301900    4.839400
H      -0.680200    0.193600    5.723800
C      -0.421800   -1.683600    4.700700
H      -0.906700   -2.269900    5.472500
C       0.073300   -2.319100    3.563700
H      -0.022000   -3.391200    3.442000
C      -2.402300   -1.437000    1.313500
C      -2.588500   -0.157100    1.847100
H      -2.083200    0.693000    1.405800
C      -3.435800    0.034000    2.938400
H      -3.588400    1.033300    3.327700
C      -4.093200   -1.053700    3.508800
H      -4.756000   -0.904100    4.354000
C      -3.911300   -2.335800    2.982600
H      -4.427900   -3.182600    3.421200
C      -3.073800   -2.527800    1.887500
H      -2.938300   -3.524800    1.481100
C      -2.470900   -1.942500   -1.539500
C      -3.781700   -1.453400   -1.485800
H      -4.172700   -1.004700   -0.579500
C      -4.588900   -1.486500   -2.625000
H      -5.589300   -1.073100   -2.570200
C      -4.100900   -2.019200   -3.817400
H      -4.728900   -2.040200   -4.701400
C      -2.794100   -2.513700   -3.876600
H      -2.407700   -2.924500   -4.803200
C      -1.978000   -2.464000   -2.748500
H      -0.954400   -2.824600   -2.809500
C       3.147100    0.623700    1.154100
C       3.824200   -0.437800    1.771700
H       3.272500   -1.185400    2.327300
C       5.213800   -0.541500    1.677800
H       5.721600   -1.368800    2.161400
C       5.946000    0.412300    0.969600
H       7.024800    0.328100    0.897700
C       5.280100    1.471900    0.350000
H       5.834000    2.220700   -0.205600
C       3.893000    1.577100    0.440100
H       3.393700    2.417900   -0.027400
C       1.075700    2.525800    1.737000
C       2.029900    3.211700    2.505200
H       2.957300    2.721200    2.779100
C       1.799200    4.525800    2.911400
H       2.548600    5.045900    3.498300
C       0.608900    5.169200    2.565700
H       0.432600    6.192400    2.879400
C      -0.354300    4.492400    1.816400
H      -1.283100    4.979900    1.541500
C      -0.120700    3.179700    1.404300
H      -0.870300    2.674800    0.804800
C       1.007400    0.767900   -2.426100
C       1.743600   -0.504900   -2.123100
H       1.695400   -1.254300   -2.915500
C       0.161100    0.743700   -3.698400
H      -0.487600    1.621200   -3.752900
H       0.817500    0.753800   -4.581300
H      -0.470600   -0.149300   -3.741000
C      -1.436700    1.169500   -1.195200
N      -2.415200    1.812300   -1.295100
Ni      0.015700    0.086100   -0.882100
Al     -4.089100    2.844400   -1.247900
Cl     -5.422600    1.453400   -0.078100
C      -3.579700    4.399500   -0.124500
H      -4.378900    5.147500   -0.054600
H      -3.353300    4.060800    0.895800
H      -2.687000    4.894500   -0.533200
C      -4.675700    2.996100   -3.129100
H      -5.665600    3.461900   -3.212700
H      -3.970700    3.596900   -3.719400
H      -4.736000    2.000600   -3.587600
C       1.790600    2.043500   -2.271200
C       1.226800    3.190600   -1.697300
C       3.103200    2.124800   -2.764700
C       1.966600    4.365300   -1.567400
H       0.211100    3.150300   -1.325800
C       3.839700    3.304700   -2.656000
H       3.554200    1.255800   -3.234500
C       3.278300    4.426600   -2.043200
H       1.517400    5.226700   -1.085400
H       4.852000    3.345000   -3.044500
H       3.853100    5.340800   -1.943000
H       2.769100   -0.347700   -1.789900
H       1.299100   -1.072300   -1.210100
C       3.575400   -3.184300   -1.102000
H       3.022100   -4.119100   -1.117800
H       3.425600   -2.543400   -0.236900
C       4.394900   -2.839300   -2.102800
C       5.170900   -1.545000   -2.098500
H       4.923100   -0.940400   -2.981800
H       4.968900   -0.951100   -1.203500
H       6.250800   -1.737700   -2.140700
C       4.601700   -3.716500   -3.314100
H       4.026700   -4.644300   -3.246600
H       4.301300   -3.191400   -4.230300
H       5.661600   -3.976200   -3.431000
93
LAN-1 Molecule Name
P      -1.258400   -1.314700   -0.139300
P       1.998400    0.266100    0.028800
O       1.495100   -2.225500   -1.114100
C      -0.862500   -2.725800   -1.281800
C      -1.861800   -3.512400   -1.877900
H      -2.902200   -3.312800   -1.653300
C      -1.542000   -4.538700   -2.768300
H      -2.337100   -5.125400   -3.213500
C      -0.211100   -4.799100   -3.093500
H       0.039000   -5.586600   -3.795100
C       0.801100   -4.032000   -2.519100
H       1.845100   -4.190100   -2.761900
C       0.465500   -3.022600   -1.623400
C       2.073700   -2.478800    0.131600
C       2.467400   -1.328300    0.822900
C       3.102000   -1.490600    2.057900
H       3.423100   -0.620300    2.618100
C       3.311600   -2.768000    2.583300
H       3.795000   -2.879800    3.546800
C       2.897200   -3.895200    1.873600
H       3.055300   -4.885400    2.285700
C       2.278500   -3.757800    0.630600
H       1.951400   -4.624600    0.068300
C      -1.010100   -2.040800    1.533500
C      -0.946200   -1.141400    2.611000
H      -1.058500   -0.076200    2.426900
C      -0.752600   -1.607000    3.910100
H      -0.712900   -0.902900    4.733900
C      -0.610600   -2.976000    4.147400
H      -0.451500   -3.339000    5.156900
C      -0.676300   -3.875800    3.083700
H      -0.566300   -4.939700    3.263500
C      -0.879900   -3.412000    1.782900
H      -0.925500   -4.119200    0.961300
C      -3.080400   -1.246000   -0.313100
C      -3.945700   -2.073600    0.418600
H      -3.548100   -2.749700    1.168100
C      -5.319900   -2.021400    0.191500
H      -5.984800   -2.655200    0.768100
C      -5.839900   -1.144800   -0.764900
H      -6.910500   -1.097000   -0.931400
C      -4.985800   -0.309600   -1.484900
H      -5.380800    0.412000   -2.189000
C      -3.610100   -0.357200   -1.257000
H      -2.957200    0.328300   -1.787500
C       3.057600    0.265500   -1.468000
C       4.432600   -0.003900   -1.400800
H       4.897100   -0.206200   -0.440500
C       5.202100   -0.023000   -2.563300
H       6.265400   -0.227900   -2.503200
C       4.601900    0.214100   -3.802600
H       5.200800    0.198100   -4.706800
C       3.230500    0.460600   -3.878200
H       2.758600    0.629800   -4.839500
C       2.461000    0.481900   -2.714800
H       1.390600    0.648300   -2.770900
C       2.757100    1.502200    1.161900
C       3.793700    2.367900    0.792600
H       4.261200    2.273900   -0.180500
C       4.218300    3.375100    1.664300
H       5.014000    4.046000    1.359700
C       3.618200    3.523600    2.913700
H       3.945900    4.308400    3.586300
C       2.585600    2.661200    3.294000
H       2.108200    2.776200    4.260700
C       2.153300    1.665300    2.422100
H       1.328900    1.018400    2.710200
C       0.567300    4.574600   -1.148600
C       0.394100    3.855500    0.216500
H       1.131600    5.490800   -0.923000
H      -0.205100    4.487300    0.882600
H       1.378100    3.712900    0.669600
C      -0.781100    4.972800   -1.761000
H      -0.629700    5.499200   -2.710000
H      -1.407100    4.095400   -1.958700
H      -1.345600    5.631300   -1.093600
C       1.392500    3.729800   -2.126900
H       1.649700    4.309600   -3.019900
H       2.321300    3.372000   -1.668500
H       0.817600    2.855400   -2.450200
C      -0.287000    2.536800    0.089500
N      -1.453100    2.102000    0.124600
Ni     -0.169900    0.679100   -0.149500
Al     -3.258800    2.753200    0.647000
Cl     -4.200500    3.126000   -1.365700
C      -4.128400    1.345100    1.737700
H      -3.393500    0.622500    2.118400
H      -4.629400    1.798600    2.603700
H      -4.878000    0.779900    1.173200
C      -2.897200    4.486500    1.557300
H      -2.515100    5.253100    0.872500
H      -3.827600    4.875700    1.993000
H      -2.176600    4.367600    2.380200
93
LAN-2 Molecule Name
P      -0.727600   -1.414600   -0.269800
P       2.093000    0.776200    0.163200
O       2.277800   -2.049200   -0.031500
C       0.147200   -2.977900   -0.730100
C      -0.538200   -4.072500   -1.283000
H      -1.608600   -4.004700   -1.436900
C       0.137000   -5.236100   -1.651900
H      -0.417000   -6.064500   -2.077800
C       1.518800   -5.328900   -1.482300
H       2.047700   -6.227400   -1.778400
C       2.221200   -4.261100   -0.926000
H       3.294000   -4.295800   -0.781400
C       1.531800   -3.113500   -0.550300
C       2.179000   -1.722000    1.327700
C       2.194300   -0.352200    1.605200
C       2.127200    0.050300    2.943100
H       2.128400    1.106200    3.186900
C       2.021000   -0.899800    3.960600
H       1.945600   -0.576200    4.991900
C       1.990000   -2.259500    3.650400
H       1.887900   -2.995400    4.439400
C       2.080600   -2.682900    2.324100
H       2.049700   -3.735600    2.068700
C      -1.164200   -1.657300    1.491600
C      -1.361300   -0.521600    2.287200
H      -1.237300    0.467300    1.861200
C      -1.748400   -0.654900    3.620300
H      -1.931000    0.232500    4.213900
C      -1.926100   -1.922700    4.170700
H      -2.230700   -2.026300    5.206400
C      -1.727700   -3.060900    3.384300
H      -1.873300   -4.047900    3.809700
C      -1.354300   -2.930800    2.049100
H      -1.205700   -3.818300    1.443100
C      -2.313500   -1.584800   -1.174200
C      -3.546900   -1.557700   -0.516600
H      -3.600400   -1.515000    0.564700
C      -4.730900   -1.512600   -1.256900
H      -5.677700   -1.449900   -0.733600
C      -4.690100   -1.507900   -2.650100
H      -5.611700   -1.460900   -3.219600
C      -3.459000   -1.539700   -3.312700
H      -3.421500   -1.522900   -4.396500
C      -2.276100   -1.567300   -2.579500
H      -1.321000   -1.562600   -3.098900
C       3.688200    0.526600   -0.701800
C       4.860200    0.215200    0.003400
H       4.826800    0.096900    1.081900
C       6.063700    0.036900   -0.677100
H       6.964800   -0.205000   -0.124300
C       6.107500    0.162900   -2.067500
H       7.044700    0.024000   -2.595100
C       4.942300    0.457100   -2.776300
H       4.967900    0.544300   -3.856800
C       3.736500    0.633100   -2.096700
H       2.830000    0.838500   -2.652500
C       2.234700    2.425700    0.971300
C       3.460200    3.058200    1.219400
H       4.387400    2.599900    0.895100
C       3.496200    4.292600    1.870800
H       4.450100    4.776300    2.049700
C       2.312400    4.904800    2.283900
H       2.343900    5.864700    2.787300
C       1.085900    4.284700    2.036700
H       0.159500    4.759300    2.340200
C       1.047100    3.056400    1.379300
H       0.087400    2.598400    1.161000
C       0.439300    1.890800   -3.317500
C       0.565900    2.327500   -1.843500
H       0.823900    0.860100   -3.427600
H      -0.104500    3.160200   -1.610400
H       1.587400    2.662700   -1.628500
C       1.318200    2.802900   -4.201100
H       1.267200    2.498800   -5.253100
H       0.969300    3.839800   -4.127700
H       2.367800    2.780000   -3.885300
C      -1.007700    1.899200   -3.836800
H      -1.031300    1.666900   -4.908100
H      -1.637100    1.171600   -3.318200
H      -1.457300    2.889300   -3.694500
C      -1.657500    1.354200   -0.771700
N      -2.708100    1.800800   -0.499100
Ni      0.093100    0.703800   -0.827000
Al     -4.432800    2.425600    0.226600
Cl     -4.752500    0.869600    1.831200
C      -3.978300    4.171800    1.047900
H      -3.178100    4.052200    1.790500
H      -3.631900    4.885400    0.287700
H      -4.839600    4.618900    1.560400
C      -5.747700    2.245700   -1.240500
H      -5.573800    3.000400   -2.019500
H      -5.670500    1.256100   -1.707600
H      -6.776100    2.368400   -0.877800
93
LAN-3 Molecule Name
P      -1.210700   -1.399800   -0.153500
P       2.208600    0.596200    0.019300
O       1.638300   -2.070800    0.857900
C      -0.511300   -3.053800    0.273800
C      -1.288700   -4.220500    0.188000
H      -2.313500   -4.149700   -0.159000
C      -0.766900   -5.466800    0.529100
H      -1.388800   -6.350700    0.448000
C       0.553300   -5.574000    0.969800
H       0.968500   -6.541800    1.226200
C       1.339100   -4.429700    1.084800
H       2.367100   -4.477400    1.423500
C       0.801000   -3.187900    0.754700
C       1.649000   -1.261600    1.995700
C       2.022600    0.076000    1.776400
C       2.094400    0.925300    2.885500
H       2.384500    1.960600    2.749400
C       1.776900    0.458800    4.164200
H       1.828500    1.134500    5.010000
C       1.389600   -0.868100    4.347400
H       1.131200   -1.229900    5.336000
C       1.330800   -1.741400    3.260300
H       1.026200   -2.772700    3.392100
C      -2.211300   -1.085100    1.360500
C      -1.663300   -0.297800    2.381600
H      -0.709000    0.193900    2.236700
C      -2.345700   -0.126300    3.584900
H      -1.911200    0.492800    4.361100
C      -3.590200   -0.725400    3.774100
H      -4.129500   -0.576000    4.702800
C      -4.150700   -1.500900    2.756800
H      -5.125000   -1.956700    2.893600
C      -3.463800   -1.686300    1.558000
H      -3.912100   -2.283400    0.771100
C      -2.438800   -1.694000   -1.475900
C      -3.476800   -0.755800   -1.606400
H      -3.610200    0.034600   -0.873900
C      -4.328100   -0.797500   -2.709500
H      -5.107800   -0.049900   -2.797300
C      -4.152500   -1.773000   -3.693300
H      -4.813300   -1.802700   -4.552700
C      -3.115700   -2.701000   -3.575900
H      -2.969500   -3.454100   -4.342800
C      -2.255200   -2.658900   -2.477200
H      -1.438800   -3.370700   -2.407900
C       3.712400   -0.333300   -0.478700
C       4.870700   -0.290600    0.313700
H       4.881600    0.304400    1.221700
C       6.004100   -1.012200   -0.055800
H       6.893700   -0.973500    0.563200
C       5.991700   -1.787900   -1.218400
H       6.874400   -2.349100   -1.505100
C       4.840300   -1.845400   -2.003500
H       4.821000   -2.455700   -2.899700
C       3.704800   -1.124100   -1.631100
H       2.795600   -1.193900   -2.216600
C       2.771300    2.348400    0.079900
C       3.983500    2.766200   -0.490400
H       4.669800    2.039500   -0.908700
C       4.315100    4.121800   -0.535500
H       5.253600    4.427200   -0.985300
C       3.445400    5.078100   -0.012400
H       3.702800    6.130700   -0.053900
C       2.234300    4.674600    0.553400
H       1.540900    5.409100    0.947400
C       1.896300    3.323400    0.592600
H       0.937600    3.033500    1.005600
H       0.817800   -1.011200   -1.372300
C      -0.832400    1.587100   -0.068900
N      -1.605800    2.387000    0.306700
Ni      0.172000    0.186300   -0.826400
Al     -3.216000    3.484300    0.606600
Cl     -4.382600    2.797800   -1.204600
C      -4.037700    2.780400    2.264300
H      -4.255900    1.710200    2.160700
H      -3.367300    2.902400    3.126100
H      -4.980000    3.293700    2.495000
C      -2.600200    5.357500    0.431700
H      -1.899000    5.614900    1.238200
H      -2.085700    5.508900   -0.525700
H      -3.433900    6.069400    0.475700
C       0.492000    0.684300   -3.408200
C      -0.678700    1.150400   -2.911900
H      -1.598900    0.578800   -2.988200
H      -0.775200    2.172000   -2.561800
C       1.730700    1.547700   -3.465100
H       2.613300    1.008400   -3.103900
H       1.935300    1.836700   -4.504800
H       1.616500    2.457000   -2.869200
C       0.567600   -0.639600   -4.133200
H       1.459600   -1.209100   -3.854100
H      -0.314200   -1.253300   -3.932300
H       0.626000   -0.459000   -5.215000
81
LAN-4 Molecule Name
P       0.800500    1.435400   -0.151200
P      -1.860500   -0.904900   -0.405900
O      -2.226400    1.939700   -0.500800
C      -0.064700    3.046800   -0.429300
C       0.650000    4.249400   -0.557700
H       1.724700    4.247000   -0.422700
C       0.004400    5.444500   -0.875300
H       0.582400    6.356600   -0.967900
C      -1.373900    5.462600   -1.088300
H      -1.875700    6.386100   -1.353000
C      -2.108600    4.285300   -0.957600
H      -3.179500    4.259900   -1.119300
C      -1.455400    3.105800   -0.617500
C      -2.571800    1.493700    0.785900
C      -2.472500    0.115600    0.993900
C      -2.778800   -0.380000    2.266700
H      -2.678300   -1.439600    2.467500
C      -3.192900    0.482700    3.283000
H      -3.415700    0.084600    4.265800
C      -3.312000    1.850100    3.035900
H      -3.639600    2.520200    3.822700
C      -2.997800    2.367000    1.779100
H      -3.068200    3.429600    1.578700
C       0.741600    1.112200    1.647800
C       1.221600   -0.140000    2.065800
H       1.627800   -0.850100    1.350200
C       1.212900   -0.478500    3.416800
H       1.599200   -1.444700    3.719900
C       0.716300    0.426000    4.358600
H       0.701300    0.161100    5.410200
C       0.246400    1.674600    3.948000
H      -0.136100    2.379600    4.678200
C       0.265500    2.023400    2.596400
H      -0.100700    2.995100    2.283000
C       2.553000    1.898600   -0.439700
C       3.411000    2.266400    0.606100
H       3.055400    2.256600    1.630300
C       4.731100    2.629300    0.335000
H       5.392700    2.896700    1.151000
C       5.202900    2.629700   -0.977800
H       6.233800    2.894800   -1.183200
C       4.353100    2.266100   -2.024000
H       4.720400    2.249500   -3.043800
C       3.035700    1.900300   -1.757100
H       2.385600    1.596700   -2.571200
C      -3.271700   -0.906800   -1.575300
C      -4.583100   -0.651600   -1.147300
H      -4.778600   -0.415500   -0.106400
C      -5.640000   -0.689200   -2.056400
H      -6.650100   -0.490700   -1.715200
C      -5.398000   -0.977600   -3.400500
H      -6.220000   -1.003800   -4.107400
C      -4.095100   -1.226400   -3.834400
H      -3.900900   -1.444100   -4.878600
C      -3.035500   -1.188900   -2.928200
H      -2.023400   -1.374300   -3.271300
C      -1.818300   -2.588400    0.317400
C      -2.988900   -3.317100    0.580400
H      -3.957900   -2.906800    0.315200
C      -2.909600   -4.577600    1.171500
H      -3.817700   -5.138100    1.365300
C      -1.665300   -5.119600    1.506200
H      -1.607800   -6.101200    1.963800
C      -0.497300   -4.403900    1.241300
H       0.478000   -4.812800    1.479400
C      -0.573600   -3.145400    0.644500
H       0.349300   -2.620200    0.422300
H      -0.290400   -1.696800   -1.901900
C       1.791300   -1.039500   -1.742600
N       2.834600   -1.575700   -1.690500
Ni      0.110000   -0.442400   -1.243000
Al      4.342600   -2.511000   -0.809900
Cl      3.178500   -3.132900    1.058000
C       4.798900   -4.088900   -1.906300
H       3.900500   -4.673200   -2.140200
H       5.264700   -3.790700   -2.855000
H       5.499600   -4.751700   -1.382900
C       5.621600   -1.073300   -0.355400
H       6.062600   -0.636400   -1.261600
H       5.109000   -0.267900    0.185500
H       6.440300   -1.436300    0.278700
100
LAN-5 Molecule Name
P       2.152200   -0.740700    0.362600
P      -1.570000   -0.352000   -0.883600
O       0.585600   -1.914700   -2.039000
C       2.629800   -2.148300   -0.733900
C       3.836900   -2.844200   -0.556300
H       4.500500   -2.560800    0.252600
C       4.192200   -3.906400   -1.385500
H       5.129300   -4.425800   -1.221600
C       3.339900   -4.300900   -2.418000
H       3.605600   -5.132700   -3.060200
C       2.145300   -3.616400   -2.627300
H       1.459300   -3.893700   -3.418300
C       1.809200   -2.545900   -1.801900
C       0.528900   -0.676900   -2.689900
C      -0.550500    0.149100   -2.333900
C      -0.676700    1.375200   -2.997900
H      -1.483900    2.049400   -2.744500
C       0.256200    1.768300   -3.959800
H       0.154100    2.737200   -4.432300
C       1.323800    0.932500   -4.280600
H       2.058600    1.242000   -5.014700
C       1.461100   -0.305200   -3.650600
H       2.288300   -0.963100   -3.889500
C       3.145200    0.629500   -0.362800
C       2.503700    1.666100   -1.050700
H       1.425000    1.691300   -1.136400
C       3.244400    2.696900   -1.632500
H       2.717300    3.501100   -2.132700
C       4.634500    2.695200   -1.535800
H       5.210300    3.501600   -1.976600
C       5.286800    1.657900   -0.861500
H       6.368500    1.654700   -0.782300
C       4.548900    0.630300   -0.280000
H       5.065300   -0.162300    0.251700
C       2.986300   -1.109600    1.954200
C       3.454500   -0.045600    2.741400
H       3.458000    0.963500    2.342700
C       3.905200   -0.276200    4.041300
H       4.263900    0.554800    4.638200
C       3.888900   -1.566800    4.573200
H       4.237100   -1.742800    5.584800
C       3.417900   -2.629400    3.799500
H       3.398100   -3.633700    4.208400
C       2.964000   -2.403000    2.499900
H       2.589000   -3.233600    1.910400
C      -2.375000   -1.907300   -1.420100
C      -2.619700   -2.186600   -2.771100
H      -2.297300   -1.487200   -3.535100
C      -3.271800   -3.363800   -3.136900
H      -3.451700   -3.574900   -4.185400
C      -3.694700   -4.265800   -2.157800
H      -4.203900   -5.179600   -2.444800
C      -3.462300   -3.987400   -0.810200
H      -3.793600   -4.679900   -0.044000
C      -2.800700   -2.815100   -0.444600
H      -2.625400   -2.593900    0.600700
C      -2.975600    0.839200   -0.875300
C      -4.297500    0.423400   -1.092200
H      -4.517000   -0.616100   -1.302400
C      -5.346200    1.341700   -1.023700
H      -6.363300    1.003000   -1.189500
C      -5.091100    2.685100   -0.746400
H      -5.907500    3.397900   -0.702200
C      -3.777800    3.109800   -0.533300
H      -3.556700    4.152300   -0.334200
C      -2.730000    2.192200   -0.586900
H      -1.721000    2.549700   -0.427900
H      -0.064400   -1.794900    0.445700
C       0.125100    1.493600    1.055700
N       0.238500    2.654000    1.199000
Ni     -0.016200   -0.362600    0.748300
Al      0.416000    4.598400    0.938700
C      -1.130100    5.388100    1.889200
H      -1.276600    6.443200    1.626900
H      -2.054000    4.850600    1.637100
H      -0.997400    5.328600    2.978000
C       2.303200    5.018600    1.354400
H       2.976000    4.377800    0.770500
H       2.550800    6.062300    1.123500
H       2.514600    4.852300    2.419700
Cl      0.038500    4.616500   -1.302700
C      -1.176800   -1.421900    2.952600
C      -0.238000   -0.486100    3.238500
H       0.790400   -0.770800    3.431700
H      -0.493800    0.547900    3.434200
C      -0.795200   -2.887200    2.938700
H      -1.205600   -3.414800    2.073200
H       0.291200   -2.993000    2.917700
H      -1.165000   -3.383800    3.844600
C      -2.620700   -1.072100    2.806700
C      -3.615200   -2.047800    2.982500
C      -3.026700    0.233700    2.479200
C      -4.966100   -1.730500    2.832900
H      -3.341000   -3.065900    3.235800
C      -4.372600    0.550400    2.329900
H      -2.286100    1.002800    2.293000
C      -5.350000   -0.431600    2.503300
H      -5.716300   -2.501800    2.970700
H      -4.652000    1.557900    2.042500
H      -6.398200   -0.187300    2.370600
100
LAN-6 Molecule Name
P       1.409900   -1.528800    0.196200
P      -1.399400    0.726200   -1.082700
O      -0.690100   -1.996800   -1.838000
C       1.030200   -3.155900   -0.591200
C       1.672100   -4.371100   -0.306700
H       2.504600   -4.383900    0.387200
C       1.248100   -5.564300   -0.894300
H       1.759900   -6.490100   -0.657500
C       0.168600   -5.567700   -1.778900
H      -0.169300   -6.495300   -2.226400
C      -0.471500   -4.370100   -2.097100
H      -1.305100   -4.333800   -2.787900
C      -0.026500   -3.189000   -1.515200
C      -0.096700   -1.099100   -2.740800
C      -0.436100    0.248500   -2.569100
C       0.100200    1.178300   -3.468100
H      -0.136700    2.229200   -3.355800
C       0.969800    0.771900   -4.480000
H       1.393900    1.509100   -5.151000
C       1.307000   -0.574400   -4.611300
H       1.999300   -0.891100   -5.382500
C       0.763000   -1.523300   -3.746700
H       1.022100   -2.571100   -3.837900
C       2.645600   -0.806800   -0.963900
C       2.680500    0.581800   -1.144800
H       1.967300    1.220200   -0.638700
C       3.644400    1.166700   -1.969200
H       3.663100    2.245900   -2.070100
C       4.569900    0.363300   -2.632900
H       5.318200    0.815100   -3.275100
C       4.538600   -1.024500   -2.465100
H       5.260200   -1.651300   -2.978300
C       3.587300   -1.606400   -1.630900
H       3.573800   -2.683700   -1.501700
C       2.469400   -1.966300    1.639300
C       3.571500   -1.155500    1.952000
H       3.869500   -0.356900    1.283100
C       4.290400   -1.356600    3.130600
H       5.132100   -0.710200    3.352900
C       3.924900   -2.371500    4.015100
H       4.484400   -2.525700    4.931000
C       2.828500   -3.182700    3.718100
H       2.532400   -3.971300    4.401500
C       2.101300   -2.976600    2.545900
H       1.245500   -3.611200    2.340700
C      -3.073700    0.018500   -1.378100
C      -3.425700   -0.663700   -2.549400
H      -2.701400   -0.787500   -3.345700
C      -4.709600   -1.190800   -2.696800
H      -4.969400   -1.719900   -3.607400
C      -5.655800   -1.038500   -1.681800
H      -6.650100   -1.455700   -1.799000
C      -5.318900   -0.343000   -0.519200
H      -6.042800   -0.212400    0.277500
C      -4.037000    0.184000   -0.372500
H      -3.790300    0.729100    0.530700
C      -1.667100    2.525600   -1.328300
C      -2.841500    3.038200   -1.901400
H      -3.643300    2.370100   -2.194400
C      -2.984600    4.412400   -2.095300
H      -3.898500    4.799200   -2.533100
C      -1.956100    5.285300   -1.734200
H      -2.071100    6.352600   -1.889100
C      -0.779300    4.782400   -1.177400
H       0.038200    5.438400   -0.900800
C      -0.639000    3.410600   -0.969200
H       0.285200    3.047700   -0.537100
C      -1.792000   -1.288000    2.191300
C      -0.557100   -0.642100    2.746700
H       0.281700   -1.296600    2.971600
H      -0.706100    0.115300    3.511000
C      -1.728900   -2.822100    2.138500
H      -2.550000   -3.238200    1.547600
H      -0.796100   -3.133300    1.662800
H      -1.765600   -3.242700    3.148100
C       0.549200    1.462700    1.521900
N       1.335200    2.291800    1.798600
Ni     -0.476600    0.038300    0.939700
C      -3.085200   -0.698500    2.746700
C      -4.175700   -1.502200    3.089900
C      -3.204600    0.692400    2.898000
C      -5.358400   -0.932500    3.570600
H      -4.117700   -2.578800    2.984700
C      -4.381900    1.261800    3.376100
H      -2.375400    1.333900    2.610600
C      -5.467800    0.449000    3.713800
H      -6.192300   -1.574800    3.833100
H      -4.453600    2.338800    3.480500
H      -6.385300    0.890400    4.086900
Al      2.828600    3.572000    1.900200
C       2.308300    4.970400    3.195400
H       3.054600    5.773500    3.240100
H       1.348700    5.423900    2.917800
H       2.203900    4.552700    4.205900
C       4.435700    2.431500    2.115600
H       4.626500    1.866400    1.193700
H       5.332100    3.027200    2.329500
H       4.296800    1.718000    2.939200
Cl      2.750300    4.358600   -0.230200
H      -1.840800   -1.030700    1.037200
100
LAN-7 Molecule Name
P      -0.081200    1.782400   -0.108600
P      -1.944700   -1.327000   -0.090400
O      -3.093100    1.257500   -0.161200
C      -1.425400    2.962500   -0.588100
C      -1.165100    4.281300   -0.997400
H      -0.141700    4.634600   -1.038500
C      -2.199100    5.141300   -1.367600
H      -1.967900    6.153100   -1.680000
C      -3.522500    4.699400   -1.342300
H      -4.326800    5.361900   -1.640800
C      -3.809700    3.401300   -0.925300
H      -4.823400    3.021700   -0.890500
C      -2.768600    2.561300   -0.544500
C      -2.999700    0.874400    1.184400
C      -2.568400   -0.439400    1.388800
C      -2.494900   -0.910700    2.704000
H      -2.157600   -1.922000    2.896100
C      -2.811500   -0.069900    3.772700
H      -2.726600   -0.439700    4.787500
C      -3.206200    1.247000    3.537400
H      -3.426400    1.906300    4.368800
C      -3.315800    1.728200    2.232100
H      -3.618600    2.749800    2.035100
C       0.097700    2.073200    1.692900
C       0.481900    1.005900    2.513700
H       0.662500    0.023200    2.096500
C       0.662400    1.196800    3.884500
H       0.988400    0.359000    4.489600
C       0.444500    2.453800    4.445500
H       0.585400    2.604400    5.510200
C       0.054600    3.524200    3.634300
H      -0.110700    4.504100    4.069100
C      -0.113600    3.338500    2.264700
H      -0.415800    4.174400    1.642500
C       1.398300    2.577800   -0.854500
C       2.556300    2.805100   -0.101200
H       2.572400    2.584100    0.959700
C       3.709000    3.295300   -0.716600
H       4.601500    3.455400   -0.122500
C       3.714200    3.571200   -2.083800
H       4.610200    3.956900   -2.557900
C       2.563400    3.344300   -2.842900
H       2.562700    3.549400   -3.907900
C       1.415400    2.840200   -2.234300
H       0.527500    2.659700   -2.833700
C      -3.426200   -1.552200   -1.137500
C      -4.657000   -1.942700   -0.590100
H      -4.742300   -2.118600    0.477700
C      -5.773100   -2.091400   -1.412200
H      -6.722300   -2.392900   -0.983200
C      -5.669600   -1.847200   -2.784100
H      -6.539100   -1.963200   -3.422000
C      -4.450700   -1.444900   -3.331400
H      -4.369500   -1.243300   -4.393800
C      -3.333600   -1.294400   -2.509100
H      -2.390300   -0.958300   -2.924000
C      -1.540200   -2.990600    0.575300
C      -2.295900   -4.140000    0.312100
H      -3.187400   -4.081800   -0.301800
C      -1.895800   -5.375500    0.827700
H      -2.483800   -6.260900    0.611700
C      -0.745300   -5.473100    1.610800
H      -0.439200   -6.434300    2.009200
C       0.017600   -4.332600    1.874400
H       0.920800   -4.384400    2.471800
C      -0.372800   -3.102300    1.351900
H       0.255000   -2.238200    1.547100
C       1.032500   -1.799400   -3.150100
C       0.290300   -2.124700   -1.831100
H       0.974500   -2.720000   -3.756800
H       0.853900   -2.823300   -1.206500
H      -0.675200   -2.590400   -2.072500
C       0.306500   -0.701900   -3.943500
H       0.831100   -0.467500   -4.875900
H      -0.705000   -1.032800   -4.200200
H       0.221800    0.224000   -3.358400
C       1.801300   -0.501600   -0.310800
N       2.753600   -0.633900    0.363600
Ni     -0.008800   -0.462400   -0.805500
C       2.514300   -1.525500   -2.937100
C       3.087000   -0.263000   -3.122200
C       3.336500   -2.569100   -2.487500
C       4.433200   -0.036800   -2.830900
H       2.478800    0.566600   -3.461100
C       4.678800   -2.348600   -2.193900
H       2.909500   -3.557800   -2.342500
C       5.231600   -1.075300   -2.356800
H       4.846900    0.958200   -2.956400
H       5.292800   -3.161300   -1.821900
H       6.274100   -0.899900   -2.114300
Al      4.017700   -0.898600    1.834200
C       5.409400   -2.188100    1.283600
H       4.952600   -3.079700    0.837100
H       6.085200   -1.747400    0.539400
H       6.011700   -2.513000    2.141600
C       4.444300    0.928400    2.474800
H       4.877400    1.528600    1.662200
H       3.541600    1.436700    2.838300
H       5.168100    0.910700    3.299400
Cl      2.559700   -1.904700    3.281100
100
LAN-8 Molecule Name
P      -0.856700    1.752800   -0.341300
P      -1.223100   -1.904100   -0.008900
O      -3.155000   -0.168700   -1.107300
C      -2.234100    2.037900   -1.551800
C      -2.330500    3.217400   -2.308400
H      -1.577700    3.987700   -2.189600
C      -3.365900    3.412200   -3.223100
H      -3.410500    4.333200   -3.793200
C      -4.331800    2.423100   -3.408300
H      -5.132500    2.565300   -4.125100
C      -4.260100    1.242600   -2.671500
H      -4.982400    0.445400   -2.798500
C      -3.227000    1.066700   -1.756400
C      -3.447300   -0.306000    0.253400
C      -2.673300   -1.262200    0.921100
C      -2.939800   -1.492700    2.274500
H      -2.355100   -2.222400    2.821900
C      -3.927300   -0.758600    2.935500
H      -4.107800   -0.930800    3.990000
C      -4.662000    0.207900    2.248600
H      -5.410600    0.794300    2.768500
C      -4.435200    0.432100    0.890100
H      -4.996400    1.181000    0.343500
C      -1.578200    2.368900    1.227500
C      -1.075200    1.828600    2.418600
H      -0.280500    1.089500    2.397900
C      -1.579700    2.246600    3.650300
H      -1.164400    1.825700    4.558500
C      -2.598900    3.197400    3.700400
H      -2.995400    3.520000    4.657200
C      -3.108200    3.738500    2.516400
H      -3.899500    4.479700    2.553000
C      -2.600700    3.328500    1.284500
H      -3.008800    3.744300    0.368600
C       0.335000    3.048200   -0.867600
C       0.357400    4.348200   -0.348600
H      -0.340400    4.633100    0.431200
C       1.294300    5.273400   -0.812300
H       1.315500    6.272100   -0.390600
C       2.211500    4.911100   -1.799000
H       2.941500    5.630900   -2.152500
C       2.195200    3.615900   -2.322800
H       2.906500    3.326300   -3.088900
C       1.266200    2.689600   -1.853700
H       1.262800    1.677900   -2.249100
C      -1.943500   -2.869900   -1.385900
C      -3.040800   -3.723300   -1.201900
H      -3.489900   -3.819800   -0.218200
C      -3.561100   -4.438400   -2.279800
H      -4.410200   -5.096600   -2.131600
C      -2.992200   -4.303800   -3.549200
H      -3.399400   -4.859500   -4.387000
C      -1.907200   -3.447600   -3.740600
H      -1.470800   -3.331600   -4.726500
C      -1.387200   -2.730000   -2.662400
H      -0.560200   -2.043500   -2.810200
C      -0.513100   -3.164200    1.130200
C      -0.508400   -4.540300    0.867500
H      -1.012500   -4.931000   -0.009300
C       0.163400   -5.418100    1.723500
H       0.166000   -6.480800    1.505600
C       0.832100   -4.933200    2.847800
H       1.359000   -5.617100    3.504300
C       0.831500   -3.562300    3.119100
H       1.361000   -3.161900    3.976100
C       0.168600   -2.684900    2.264700
H       0.220500   -1.619900    2.474600
C       3.395500   -2.335800   -1.414600
C       2.680400   -2.301400   -0.027400
H       3.904700   -3.308000   -1.448000
H       3.431700   -2.338400    0.769000
H       2.037100   -3.181800    0.059100
C       2.379700   -2.304300   -2.566600
H       2.887300   -2.406800   -3.530400
H       1.657500   -3.121700   -2.461100
H       1.814900   -1.365300   -2.576300
C       1.860500   -1.074400    0.132300
N       2.010100    0.091300    0.533200
Ni      0.215000   -0.236500   -0.156000
C       4.468800   -1.262900   -1.530200
C       4.158400    0.071200   -1.828500
C       5.809700   -1.597200   -1.303200
C       5.157300    1.042500   -1.885200
H       3.128900    0.364600   -1.993400
C       6.813900   -0.631500   -1.370200
H       6.068200   -2.625700   -1.066500
C       6.489800    0.694400   -1.659500
H       4.890800    2.074300   -2.088200
H       7.845600   -0.912000   -1.187800
H       7.266000    1.450500   -1.699500
Al      3.070600    1.058600    1.898800
C       4.866000    0.226000    1.904200
H       4.805700   -0.860100    2.051400
H       5.398200    0.410100    0.962900
H       5.475500    0.629500    2.723700
C       2.779100    3.000600    1.716400
H       3.011300    3.344800    0.699800
H       1.736800    3.265600    1.929900
H       3.414400    3.558800    2.416200
Cl      1.906500    0.253700    3.708100
100
LAN-9 Molecule Name
P       2.059800   -0.652600   -0.628600
P      -0.568600    2.048200    0.290800
O       1.053200    0.525100    1.995300
C       2.544100   -1.108600    1.095700
C       3.544300   -2.070600    1.313300
H       3.969600   -2.590300    0.462500
C       4.001700   -2.366700    2.595100
H       4.766800   -3.121100    2.734600
C       3.484600   -1.674200    3.689800
H       3.855100   -1.873700    4.688700
C       2.496700   -0.710600    3.504100
H       2.124400   -0.138300    4.343600
C       2.007000   -0.458900    2.220800
C      -0.183300    0.648600    2.640700
C      -1.063100    1.519700    1.975800
C      -2.322300    1.752900    2.534000
H      -3.016300    2.415900    2.030600
C      -2.707200    1.104300    3.709200
H      -3.691300    1.279500    4.126600
C      -1.838000    0.201600    4.315900
H      -2.148200   -0.343600    5.199700
C      -0.565700   -0.033100    3.787800
H       0.072200   -0.774900    4.245800
C       2.396600   -2.227700   -1.518700
C       1.625800   -3.346500   -1.155900
H       0.888900   -3.269500   -0.363600
C       1.792300   -4.563100   -1.811700
H       1.186400   -5.412100   -1.514800
C       2.723800   -4.677200   -2.847500
H       2.850500   -5.623100   -3.362400
C       3.491500   -3.572200   -3.214500
H       4.220800   -3.656600   -4.013000
C       3.334600   -2.351800   -2.551200
H       3.949300   -1.505300   -2.836400
C       3.424500    0.469200   -1.148500
C       3.338600    1.051500   -2.424700
H       2.490600    0.821900   -3.063100
C       4.313700    1.941400   -2.868400
H       4.235100    2.378100   -3.858000
C       5.380700    2.281700   -2.031800
H       6.134800    2.983700   -2.370400
C       5.467200    1.719900   -0.759100
H       6.286000    1.987200   -0.100400
C       4.499800    0.812300   -0.320500
H       4.582300    0.386000    0.672100
C       0.818400    3.218700    0.594200
C       0.966600    3.849300    1.839100
H       0.258500    3.645000    2.635100
C       2.025500    4.728400    2.064600
H       2.131400    5.205000    3.033100
C       2.949700    4.988100    1.050600
H       3.777500    5.665700    1.230300
C       2.805600    4.371500   -0.192400
H       3.524200    4.555300   -0.983200
C       1.745900    3.493400   -0.418600
H       1.656000    3.004000   -1.380900
C      -1.951800    3.124200   -0.242000
C      -1.924700    4.519400   -0.099000
H      -1.048500    5.007200    0.313000
C      -3.023800    5.285800   -0.487200
H      -2.992200    6.364200   -0.375800
C      -4.159900    4.667000   -1.011500
H      -5.015200    5.264400   -1.308400
C      -4.193400    3.279000   -1.156200
H      -5.068500    2.788500   -1.565000
C      -3.092100    2.509000   -0.782100
H      -3.122300    1.430500   -0.904900
C      -0.812400   -1.124000    0.205500
N      -1.200000   -2.027900    0.847900
Ni     -0.002400    0.223000   -0.840500
H       0.675200    1.267700   -1.597300
C      -1.144200   -3.502600    3.653600
H      -0.074900   -3.248200    3.689800
H      -1.703500   -2.725700    4.187300
H      -1.281700   -4.447600    4.194800
C      -1.029400   -5.120200    0.640000
H      -1.204000   -4.931700   -0.428100
H       0.052300   -5.238800    0.798800
H      -1.505800   -6.078500    0.883200
Cl     -3.990600   -3.510800    1.572900
Al     -1.761000   -3.663600    1.778200
C      -0.762200   -0.086600   -3.177700
C      -1.643600   -1.047100   -2.806700
H      -1.060700    0.952300   -3.277100
H       0.231300   -0.352400   -3.525500
C      -3.072300   -0.726200   -2.526600
C      -3.764100   -1.354300   -1.479500
C      -3.762900    0.189500   -3.336900
C      -5.099200   -1.046200   -1.223400
H      -3.268800   -2.070300   -0.835700
C      -5.105900    0.478400   -3.096400
H      -3.250600    0.657900   -4.170900
C      -5.775500   -0.131100   -2.032600
H      -5.597100   -1.533000   -0.392500
H      -5.629500    1.175200   -3.742900
H      -6.819600    0.095400   -1.844100
C      -1.263100   -2.506600   -2.786100
H      -1.417700   -2.949800   -1.797300
H      -1.894600   -3.062900   -3.488300
H      -0.215300   -2.649900   -3.058200
100
LAN-TS11-12 Molecule Name
P       1.941600   -0.884200    0.460200
P      -1.801100   -0.878900   -0.288500
O      -0.023500   -3.123200   -0.026500
C       2.212800   -2.673300    0.816300
C       3.391100   -3.192000    1.375500
H       4.204700   -2.517800    1.619200
C       3.528100   -4.556500    1.632700
H       4.447900   -4.931700    2.066600
C       2.483400   -5.433000    1.336500
H       2.584000   -6.492600    1.541700
C       1.307300   -4.944800    0.768600
H       0.478000   -5.597800    0.525500
C       1.188300   -3.583900    0.506700
C      -0.128700   -2.799600   -1.388500
C      -1.055000   -1.794800   -1.702700
C      -1.246300   -1.485600   -3.054200
H      -1.956600   -0.714700   -3.329700
C      -0.508700   -2.132500   -4.047500
H      -0.660400   -1.869300   -5.087800
C       0.434400   -3.098700   -3.699200
H       1.027000   -3.584800   -4.465500
C       0.624300   -3.445300   -2.361600
H       1.354400   -4.194500   -2.079400
C       2.569100   -0.747800   -1.261900
C       1.868600    0.032300   -2.188600
H       0.984200    0.573400   -1.878600
C       2.304700    0.118000   -3.511600
H       1.750600    0.727400   -4.215600
C       3.446600   -0.570900   -3.915900
H       3.786000   -0.503000   -4.943700
C       4.159500   -1.342000   -2.993700
H       5.053900   -1.871900   -3.303000
C       3.724700   -1.429900   -1.673700
H       4.280100   -2.037600   -0.967300
C       3.183400    0.015800    1.468200
C       3.744300    1.191300    0.945600
H       3.576000    1.473700   -0.087800
C       4.492300    2.039900    1.762400
H       4.885700    2.958000    1.342700
C       4.698700    1.720300    3.105100
H       5.280300    2.381400    3.738000
C       4.144900    0.552000    3.634900
H       4.298600    0.301100    4.679100
C       3.381300   -0.290100    2.826200
H       2.934400   -1.182100    3.256000
C      -3.031100   -2.098300    0.328700
C      -3.866900   -2.805500   -0.549400
H      -3.791700   -2.632800   -1.618400
C      -4.785900   -3.731100   -0.058000
H      -5.427500   -4.271800   -0.745100
C      -4.875400   -3.966600    1.316500
H      -5.590200   -4.687900    1.697700
C      -4.037600   -3.280300    2.195700
H      -4.094900   -3.469100    3.262200
C      -3.118100   -2.353900    1.701300
H      -2.452700   -1.834800    2.381600
C      -2.814700    0.414400   -1.118200
C      -4.213300    0.461300   -1.071700
H      -4.768500   -0.312400   -0.554900
C      -4.904200    1.516000   -1.672900
H      -5.987500    1.541400   -1.621900
C      -4.211300    2.535500   -2.323900
H      -4.752000    3.353900   -2.786600
C      -2.815300    2.504100   -2.369300
H      -2.259400    3.296800   -2.858800
C      -2.126100    1.455500   -1.766600
H      -1.043000    1.456400   -1.791800
C       0.302600    1.670200    0.590200
N       0.626100    2.582900   -0.096900
Ni     -0.080800   -0.036800    0.938000
Al      1.018500    4.113100   -1.228600
C       0.974400    3.464100   -3.106900
H       1.927400    2.984500   -3.359800
H       0.169900    2.735700   -3.287200
H       0.827100    4.298800   -3.804800
C      -0.264700    5.514000   -0.651800
H      -1.299100    5.229600   -0.895300
H      -0.206400    5.696000    0.429600
H      -0.058500    6.468500   -1.153100
Cl      3.126300    4.580600   -0.603900
C      -0.177500    0.422200    3.217300
C      -0.500800    1.618400    2.303600
H      -0.461300   -0.583700    2.823600
H       0.884900    0.412500    3.466800
H      -0.745100    0.526000    4.149500
C      -1.975100    1.909700    2.109600
C      -2.378500    3.027800    1.361600
C      -2.971100    1.088000    2.656700
C      -3.727900    3.311000    1.170500
H      -1.636400    3.667300    0.898600
C      -4.323500    1.370400    2.464600
H      -2.702700    0.214800    3.238600
C      -4.708100    2.484900    1.721900
H      -4.010500    4.170400    0.573000
H      -5.072100    0.712200    2.892600
H      -5.758800    2.701300    1.563100
C       0.289400    2.831500    2.840600
H       0.125000    3.728400    2.242400
H      -0.045000    3.027000    3.866800
H       1.363000    2.622400    2.849100
93
LAN-TS1-2 Molecule Name
P       0.620600    1.455300   -0.067800
P      -2.105000   -0.912100    0.093100
O      -2.054900    1.296800   -1.605400
C       0.049600    2.496100   -1.495900
C       0.876200    3.482500   -2.059600
H       1.847500    3.676200   -1.622600
C       0.478900    4.206800   -3.184100
H       1.142600    4.957900   -3.596000
C      -0.755300    3.955400   -3.781900
H      -1.059500    4.503700   -4.666000
C      -1.599100    2.987200   -3.239600
H      -2.559600    2.756100   -3.684600
C      -1.196900    2.286600   -2.107500
C      -2.962400    1.597500   -0.581700
C      -3.154900    0.570100    0.348700
C      -4.080600    0.776500    1.376500
H      -4.251000   -0.001700    2.111500
C      -4.774100    1.984700    1.472100
H      -5.483700    2.135100    2.277400
C      -4.556100    2.993400    0.533100
H      -5.095000    3.931300    0.607200
C      -3.647500    2.803800   -0.508500
H      -3.470000    3.579800   -1.243500
C      -0.189000    2.204900    1.401500
C      -0.049000    1.514100    2.616600
H       0.522500    0.590100    2.646600
C      -0.633400    2.009300    3.781200
H      -0.508900    1.473900    4.716300
C      -1.379300    3.190000    3.741300
H      -1.844100    3.570000    4.644400
C      -1.518500    3.882900    2.538800
H      -2.093700    4.801400    2.503000
C      -0.915900    3.400000    1.375700
H      -1.021400    3.950200    0.447400
C       2.358300    2.012100    0.095100
C       2.740600    3.044200    0.965800
H       2.010500    3.503600    1.622900
C       4.063500    3.486600    0.989200
H       4.352600    4.278300    1.671700
C       5.011700    2.907400    0.144400
H       6.042100    3.243600    0.173700
C       4.641900    1.873600   -0.716300
H       5.377500    1.379300   -1.338800
C       3.322500    1.423500   -0.736900
H       3.054700    0.600800   -1.390400
C      -2.992300   -1.780300   -1.260000
C      -4.366900   -2.053400   -1.180900
H      -4.926100   -1.750200   -0.301300
C      -5.014400   -2.709300   -2.225600
H      -6.076600   -2.916600   -2.156700
C      -4.296300   -3.095400   -3.361500
H      -4.801700   -3.604900   -4.174600
C      -2.932300   -2.819600   -3.451800
H      -2.373400   -3.109500   -4.334500
C      -2.283000   -2.162000   -2.405000
H      -1.226200   -1.932700   -2.484500
C      -2.416400   -1.961100    1.569800
C      -2.751200   -3.318700    1.459100
H      -2.960400   -3.751400    0.487100
C      -2.818900   -4.125200    2.597700
H      -3.073800   -5.174300    2.495200
C      -2.559300   -3.587800    3.857700
H      -2.612200   -4.216300    4.739600
C      -2.223700   -2.236900    3.978400
H      -2.016800   -1.811800    4.954400
C      -2.142900   -1.432100    2.844100
H      -1.866800   -0.387600    2.946800
C       1.803500   -1.431600    0.188800
N       2.940700   -1.474900    0.541500
Ni      0.174000   -0.730000   -0.109700
Al      4.846200   -1.667900    0.902500
Cl      5.556300   -1.499300   -1.248100
C       5.408600   -0.139400    2.034500
H       5.566500   -0.459600    3.073400
H       6.343800    0.308900    1.676200
H       4.643400    0.647200    2.030900
C       5.101800   -3.524300    1.553600
H       4.714100   -4.261000    0.838800
H       6.165700   -3.745200    1.711300
H       4.585400   -3.677300    2.511900
C       1.322400   -3.233000   -1.735800
C       0.776800   -2.793300   -0.351100
H       0.513400   -3.816200   -2.202800
H       1.083200   -3.463300    0.454600
H      -0.317000   -2.831600   -0.356600
C       2.545300   -4.150100   -1.591700
H       2.868500   -4.512900   -2.573500
H       3.387100   -3.609400   -1.148700
H       2.318000   -5.019300   -0.964500
C       1.651000   -2.057400   -2.675200
H       1.792000   -2.421700   -3.698300
H       0.857400   -1.297900   -2.687000
H       2.582900   -1.572900   -2.364700
112
LAN-TS13-14 Molecule Name
P       0.585600   -1.024300    1.418900
P      -2.214900    0.990800   -0.603800
O      -1.734700    0.576700    2.196100
C       0.198700   -0.480600    3.138200
C       0.990300   -0.749500    4.261300
H       1.903200   -1.322800    4.148100
C       0.616100   -0.287100    5.525200
H       1.239700   -0.509100    6.383600
C      -0.552300    0.458600    5.682900
H      -0.838200    0.825800    6.661900
C      -1.355600    0.738000    4.576500
H      -2.264100    1.321300    4.669500
C      -0.977600    0.257400    3.328200
C      -2.927900   -0.084000    1.870300
C      -3.382800    0.155300    0.564300
C      -4.577100   -0.467300    0.180300
H      -4.954600   -0.321500   -0.824500
C      -5.270200   -1.304100    1.057000
H      -6.187000   -1.782200    0.732000
C      -4.769500   -1.542500    2.335500
H      -5.288600   -2.213700    3.010100
C      -3.590500   -0.925800    2.754600
H      -3.184000   -1.119300    3.739500
C      -0.608900   -2.405300    1.241300
C      -1.448500   -2.495000    0.126900
H      -1.370600   -1.767800   -0.669100
C      -2.396000   -3.513200    0.034100
H      -3.037600   -3.566000   -0.837400
C      -2.505500   -4.458000    1.050800
H      -3.237000   -5.254800    0.975200
C      -1.665000   -4.384700    2.164600
H      -1.740100   -5.125200    2.953300
C      -0.724800   -3.363100    2.262600
H      -0.079200   -3.309300    3.133600
C       2.235000   -1.816000    1.527300
C       2.448200   -3.096500    1.000700
H       1.621900   -3.683900    0.614500
C       3.743200   -3.613000    0.918800
H       3.889700   -4.595200    0.484600
C       4.829800   -2.865000    1.371500
H       5.833400   -3.271900    1.309300
C       4.624500   -1.584000    1.894000
H       5.466600   -0.992100    2.237100
C       3.336900   -1.054600    1.956800
H       3.189700   -0.044200    2.327000
C      -2.465200    2.795200   -0.308600
C      -2.849600    3.319200    0.934000
H      -3.098300    2.648600    1.747400
C      -2.918200    4.699700    1.134000
H      -3.223800    5.085900    2.100700
C      -2.605500    5.580500    0.098300
H      -2.666600    6.651900    0.254700
C      -2.218200    5.071600   -1.143800
H      -1.979700    5.746800   -1.959100
C      -2.142500    3.693300   -1.343300
H      -1.854600    3.310900   -2.318100
C      -3.078200    0.754900   -2.215100
C      -4.233400    1.458900   -2.597700
H      -4.641400    2.217700   -1.937700
C      -4.854800    1.190000   -3.816000
H      -5.745800    1.739700   -4.100600
C      -4.334900    0.209500   -4.666400
H      -4.822400   -0.002000   -5.612100
C      -3.187000   -0.493000   -4.300400
H      -2.776200   -1.257000   -4.951000
C      -2.556700   -0.215700   -3.084800
H      -1.650100   -0.753000   -2.821500
C       2.282800    2.892400   -1.490000
C       1.256700    1.850300   -1.666700
H       1.579400    1.176500   -2.468800
H       0.285400    2.287200   -1.914100
C       1.986300    4.260600   -2.085100
H       2.587600    5.061600   -1.645400
H       2.186400    4.225400   -3.162800
H       0.929900    4.501300   -1.945300
C       0.911400   -0.879200   -1.393100
N       0.983100   -1.794900   -2.125600
Ni      0.845900    0.559900   -0.180200
C       0.987100    2.004600    1.200500
H       1.418700    1.522600    2.086400
H      -0.076700    2.195300    1.383700
C       3.713500    2.464100   -1.416400
C       4.761200    3.335200   -1.760800
C       4.038200    1.172600   -0.962100
C       6.089300    2.924200   -1.665800
H       4.547200    4.334700   -2.120500
C       5.365900    0.764200   -0.864400
H       3.243900    0.491800   -0.676600
C       6.395800    1.638600   -1.215900
H       6.883900    3.606800   -1.946200
H       5.587800   -0.237700   -0.514500
H       7.430200    1.320800   -1.142200
C       1.728300    3.278500    0.964300
C       0.886300    4.546400    0.975600
H       1.454900    5.426500    0.655400
H       0.006500    4.431600    0.336900
H       0.528400    4.723000    1.997200
C       3.073100    3.405900    1.666400
H       3.664400    2.494300    1.534800
H       3.651600    4.254800    1.286300
H       2.905200    3.557100    2.739800
Al      0.968300   -3.446500   -3.196900
C       2.726700   -3.514400   -4.100600
H       2.875100   -4.466800   -4.625200
H       2.829300   -2.705000   -4.836100
H       3.537200   -3.409700   -3.367900
C      -0.738700   -3.311200   -4.200600
H      -1.584600   -3.175800   -3.513000
H      -0.710000   -2.453400   -4.888000
H      -0.936900   -4.212400   -4.793800
Cl      0.824200   -5.019900   -1.589300
H       2.077700    3.212800   -0.198900
112
LAN-TS15-16 Molecule Name
P      -1.554500   -1.436700    0.033000
P       2.201400    0.153200    0.641600
O       1.017900   -2.473600    0.892500
C      -1.139600   -3.224100    0.189500
C      -2.006300   -4.280500   -0.113200
H      -3.008000   -4.068700   -0.468800
C      -1.593900   -5.605500    0.047000
H      -2.279400   -6.411700   -0.187400
C      -0.307500   -5.891000    0.505200
H       0.014000   -6.919400    0.623200
C       0.571700   -4.851300    0.812200
H       1.578200   -5.046500    1.163400
C       0.142000   -3.538400    0.661100
C       1.367800   -2.038900    2.182000
C       2.063800   -0.821100    2.217600
C       2.438300   -0.339800    3.478300
H       2.959100    0.606900    3.551700
C       2.118100   -1.036200    4.644900
H       2.411900   -0.635100    5.608100
C       1.402600   -2.229300    4.569700
H       1.127500   -2.761400    5.473200
C       1.023700   -2.742800    3.329300
H       0.449800   -3.658600    3.263600
C      -1.708100   -0.980200    1.801400
C      -1.060700    0.135800    2.339700
H      -0.468400    0.780500    1.705700
C      -1.169700    0.427500    3.698700
H      -0.662000    1.297100    4.098200
C      -1.931300   -0.390100    4.529600
H      -2.023400   -0.157400    5.584500
C      -2.585700   -1.505600    4.001300
H      -3.187200   -2.139800    4.643000
C      -2.472800   -1.802300    2.646400
H      -2.981400   -2.672800    2.244100
C      -3.261200   -1.377100   -0.630000
C      -4.247900   -0.614100    0.008900
H      -4.050200   -0.129300    0.958900
C      -5.489200   -0.424300   -0.601600
H      -6.229800    0.190500   -0.103500
C      -5.758400   -0.999800   -1.843000
H      -6.723300   -0.849100   -2.314700
C      -4.776400   -1.757000   -2.488300
H      -4.976700   -2.195800   -3.459800
C      -3.529100   -1.933400   -1.893500
H      -2.757100   -2.486900   -2.420200
C       3.739400   -0.530600   -0.122300
C       4.070600   -1.891000   -0.024800
H       3.479300   -2.546100    0.603100
C       5.153200   -2.413700   -0.733700
H       5.395600   -3.467100   -0.639400
C       5.924500   -1.589600   -1.554600
H       6.766700   -1.997700   -2.102600
C       5.609400   -0.233300   -1.656300
H       6.206900    0.419600   -2.283700
C       4.526800    0.290200   -0.949500
H       4.298200    1.347400   -1.031700
C       2.766900    1.784600    1.282900
C       4.065500    2.043200    1.755800
H       4.815000    1.258800    1.725200
C       4.398300    3.299200    2.260600
H       5.404500    3.487000    2.620200
C       3.434700    4.311000    2.310700
H       3.692100    5.286100    2.710400
C       2.144200    4.067400    1.842500
H       1.390300    4.845400    1.871000
C       1.814600    2.814400    1.321300
H       0.819300    2.654700    0.915900
C      -1.336600    1.227800   -0.642300
N      -1.917200    2.103400   -0.123900
Ni     -0.471300   -0.199100   -1.520000
Al     -2.901600    3.578500    0.708000
Cl     -4.254500    2.424800    2.088900
C      -1.491800    4.570000    1.685200
H      -1.885900    5.436300    2.230300
H      -0.984200    3.920200    2.410400
H      -0.744800    4.930400    0.962800
C      -3.899800    4.401300   -0.791200
H      -4.644200    5.126900   -0.440300
H      -3.217700    4.927200   -1.474100
H      -4.431600    3.633200   -1.368000
C       0.380500   -1.830900   -2.267700
H      -0.403300   -2.597200   -2.322200
H       1.043200   -2.052400   -1.420400
C       1.165700   -1.847300   -3.530600
C       2.672400   -1.734900   -3.406700
H       3.151500   -1.570600   -4.377200
H       2.948700   -0.927800   -2.724000
H       3.071100   -2.663400   -2.980400
C       0.679500   -2.782000   -4.625700
H      -0.402500   -2.687900   -4.763500
H       1.181700   -2.592500   -5.579900
H       0.892600   -3.816800   -4.329400
C      -0.291400    1.023500   -3.297700
C       0.483400    0.421700   -4.371800
H       1.450500    0.866500   -4.618100
H      -0.071000    0.102700   -5.260500
C      -1.778200    1.145300   -3.693200
H      -2.417800    1.482000   -2.875300
H      -1.909800    1.855200   -4.525300
H      -2.161200    0.171500   -4.016300
C       0.365300    2.268300   -2.745300
C      -0.352300    3.460900   -2.556500
C       1.734000    2.273700   -2.413600
C       0.267500    4.603200   -2.047200
H      -1.411200    3.498800   -2.782400
C       2.356300    3.418700   -1.924100
H       2.308700    1.356600   -2.516300
C       1.625300    4.592800   -1.731200
H      -0.320200    5.503300   -1.897600
H       3.410400    3.393600   -1.665000
H       2.104800    5.476800   -1.326500
H       0.891000   -0.718800   -4.036000
93
LAN-TS2-3 Molecule Name
P      -1.156500   -1.413900   -0.152000
P       2.155500    0.575500   -0.066200
O       1.538600   -1.896100    1.073400
C      -0.509600   -3.027100    0.471300
C      -1.242600   -4.223000    0.453900
H      -2.235500   -4.235700    0.019700
C      -0.712200   -5.400600    0.982100
H      -1.298100   -6.312200    0.954000
C       0.565800   -5.405900    1.541900
H       0.982700   -6.320900    1.946600
C       1.308500   -4.226800    1.584200
H       2.304400   -4.194800    2.009500
C       0.761300   -3.057800    1.065100
C       1.484600   -0.958400    2.111100
C       1.860800    0.341300    1.737900
C       1.907100    1.317500    2.738600
H       2.214100    2.327100    2.492400
C       1.541300    1.009400    4.051300
H       1.568400    1.781400    4.811400
C       1.135100   -0.283900    4.380300
H       0.833900   -0.518600    5.394600
C       1.114500   -1.285000    3.408800
H       0.802400   -2.293300    3.653100
C      -1.966800   -0.790300    1.378700
C      -1.542800    0.386500    2.001200
H      -0.740900    0.970000    1.570900
C      -2.149000    0.822100    3.179500
H      -1.815600    1.743500    3.641400
C      -3.190000    0.088700    3.741400
H      -3.674000    0.438200    4.646300
C      -3.622700   -1.089200    3.127100
H      -4.441400   -1.657500    3.554500
C      -3.013300   -1.529000    1.956400
H      -3.364300   -2.439500    1.481700
C      -2.574100   -1.832500   -1.237600
C      -3.690100   -0.979300   -1.239900
H      -3.767400   -0.160100   -0.530200
C      -4.712500   -1.169700   -2.170000
H      -5.562900   -0.497600   -2.161100
C      -4.636200   -2.207700   -3.100300
H      -5.433700   -2.352600   -3.820800
C      -3.526000   -3.055200   -3.106500
H      -3.457100   -3.858400   -3.832300
C      -2.495400   -2.863400   -2.186600
H      -1.623800   -3.509700   -2.218800
C       3.827700   -0.196700   -0.190900
C       4.967500    0.387100    0.384700
H       4.889100    1.349500    0.879600
C       6.199700   -0.261900    0.326500
H       7.074200    0.201200    0.770500
C       6.306000   -1.509400   -0.293900
H       7.265400   -2.013500   -0.338100
C       5.174200   -2.108400   -0.847300
H       5.248400   -3.083000   -1.317600
C       3.941600   -1.455900   -0.793100
H       3.054000   -1.929200   -1.196300
C       2.462400    2.374500   -0.289200
C       3.494300    2.837000   -1.123100
H       4.223100    2.140500   -1.523600
C       3.597000    4.192000   -1.443600
H       4.401800    4.529700   -2.087800
C       2.671000    5.106600   -0.941700
H       2.752700    6.158600   -1.191400
C       1.631700    4.657800   -0.124800
H       0.893000    5.353500    0.257100
C       1.522900    3.305000    0.191100
H       0.683800    2.979300    0.794800
H       0.769400   -1.300200   -1.878400
C      -0.920000    1.437100   -0.973300
N      -1.630100    2.332500   -0.707300
Ni      0.136400   -0.046700   -1.366000
Al     -2.860500    3.637800    0.094100
Cl     -4.572700    2.262500    0.590800
C      -1.889700    4.241500    1.723800
H      -1.232700    3.454000    2.117000
H      -1.270100    5.123700    1.509800
H      -2.588700    4.515500    2.524100
C      -3.340600    4.930100   -1.323400
H      -2.454100    5.477500   -1.672200
H      -3.782200    4.418000   -2.187300
H      -4.071200    5.667600   -0.967300
C       0.814100   -0.489000   -3.474700
C       0.485400    0.844900   -3.205500
H      -0.481000    1.232200   -3.511300
H       1.265100    1.583800   -3.039600
C       2.268800   -0.860700   -3.696200
H       2.457200   -1.917800   -3.490300
H       2.516300   -0.673700   -4.749000
H       2.937200   -0.260800   -3.074900
C      -0.192700   -1.371700   -4.188100
H      -0.050600   -2.425700   -3.933900
H      -1.219500   -1.095100   -3.939300
H      -0.053500   -1.265600   -5.271900
100
LAN-TS5-6 Molecule Name
P       1.627100   -1.361500    0.298300
P      -1.564700    0.379100   -0.862700
O      -0.490700   -2.138800   -1.648800
C       1.365200   -3.057500   -0.378900
C       2.126400   -4.190500   -0.053800
H       2.962000   -4.093200    0.630000
C       1.827500   -5.441800   -0.595400
H       2.430900   -6.301100   -0.325600
C       0.758400   -5.585600   -1.480300
H       0.520600   -6.557000   -1.898400
C      -0.000500   -4.471500   -1.837600
H      -0.832700   -4.544500   -2.527200
C       0.314900   -3.229700   -1.297000
C      -0.044500   -1.175000   -2.564500
C      -0.556100    0.116900   -2.375700
C      -0.206500    1.102400   -3.305400
H      -0.594200    2.107800   -3.197400
C       0.662500    0.810300   -4.357600
H       0.941800    1.591500   -5.054300
C       1.187300   -0.474200   -4.496000
H       1.883600   -0.695800   -5.296200
C       0.824500   -1.482500   -3.603700
H       1.225400   -2.484300   -3.701900
C       2.786200   -0.659100   -0.955700
C       2.673500    0.683400   -1.334900
H       1.894700    1.309300   -0.921400
C       3.566800    1.240600   -2.253100
H       3.464400    2.288800   -2.509400
C       4.571600    0.453300   -2.811300
H       5.265700    0.883500   -3.525200
C       4.688700   -0.891100   -2.445100
H       5.471900   -1.506700   -2.874900
C       3.806400   -1.442600   -1.519700
H       3.909100   -2.486000   -1.241000
C       2.744200   -1.565200    1.748600
C       3.675400   -0.543400    2.002200
H       3.817400    0.255700    1.283300
C       4.420200   -0.535700    3.180500
H       5.130600    0.265200    3.352800
C       4.250900   -1.547000    4.127700
H       4.831000   -1.540300    5.043800
C       3.326400   -2.564900    3.890500
H       3.186100   -3.354700    4.620800
C       2.573500   -2.570800    2.714900
H       1.857800   -3.369900    2.554900
C      -3.102100   -0.529000   -1.311100
C      -3.693100   -0.296600   -2.564300
H      -3.235700    0.403900   -3.255500
C      -4.863700   -0.959300   -2.926100
H      -5.310000   -0.772900   -3.896700
C      -5.461000   -1.860800   -2.040500
H      -6.374900   -2.373000   -2.321500
C      -4.878500   -2.098600   -0.796700
H      -5.335000   -2.793100   -0.100100
C      -3.701900   -1.438800   -0.438200
H      -3.258700   -1.632000    0.528100
C      -2.107400    2.134400   -0.903000
C      -3.457900    2.474600   -0.723500
H      -4.213100    1.699600   -0.660400
C      -3.838000    3.813400   -0.612800
H      -4.884900    4.061100   -0.472600
C      -2.880200    4.826300   -0.684000
H      -3.178700    5.865200   -0.596100
C      -1.535200    4.497300   -0.861400
H      -0.770500    5.264100   -0.911600
C      -1.150900    3.161200   -0.960900
H      -0.094400    2.943900   -1.069600
H      -1.261800   -1.279500    0.951700
C       0.548700    1.515700    1.227700
N       1.219100    2.475700    1.324000
Ni     -0.392500   -0.084600    1.009900
Al      2.463800    3.987400    1.155200
C       1.726600    5.459400    2.247300
H       2.255000    6.403200    2.063000
H       0.666900    5.620300    2.011600
H       1.802500    5.236700    3.320100
C       4.245900    3.173700    1.459000
H       4.483700    2.458200    0.660700
H       5.044000    3.926300    1.474900
H       4.265500    2.640700    2.420000
Cl      2.182500    4.432500   -1.059000
C      -1.425400   -1.167300    2.651600
C      -0.367300   -0.328300    3.056600
H       0.596600   -0.760600    3.311000
H      -0.581400    0.640600    3.493000
C      -1.227400   -2.676300    2.735500
H      -1.894300   -3.219100    2.059800
H      -0.201000   -2.929900    2.471200
H      -1.411100   -3.018300    3.760500
C      -2.837700   -0.653800    2.757800
C      -3.877800   -1.498100    3.169600
C      -3.148200    0.675300    2.426100
C      -5.192000   -1.029900    3.238000
H      -3.673800   -2.528900    3.435100
C      -4.457500    1.141400    2.494200
H      -2.364400    1.338000    2.072900
C      -5.487900    0.288300    2.897100
H      -5.982500   -1.700700    3.556900
H      -4.670200    2.167700    2.215700
H      -6.509700    0.648500    2.941300
100
LAN-TS7-8 Molecule Name
P      -0.043500    1.802900   -0.146300
P      -2.145100   -1.294100   -0.297600
O      -3.063500    1.377300   -0.392700
C      -1.320200    3.043600   -0.658200
C      -0.998700    4.369500   -0.993900
H       0.036500    4.688700   -0.967900
C      -1.984400    5.280800   -1.372800
H      -1.705600    6.297100   -1.626500
C      -3.320900    4.884500   -1.429600
H      -4.088100    5.586800   -1.734400
C      -3.669200    3.579200   -1.087800
H      -4.695600    3.234600   -1.120500
C      -2.676600    2.686200   -0.697400
C      -3.148800    0.950600    0.939400
C      -2.871800   -0.407300    1.133300
C      -2.982800   -0.924100    2.428400
H      -2.764200   -1.969900    2.609600
C      -3.329400   -0.090700    3.493800
H      -3.393400   -0.499100    4.495300
C      -3.565400    1.266500    3.273800
H      -3.808000    1.918500    4.104900
C      -3.485900    1.798700    1.985900
H      -3.662200    2.852200    1.804800
C       0.007200    2.030700    1.675300
C       0.156900    0.908100    2.498400
H       0.251200   -0.081600    2.070300
C       0.211500    1.048700    3.885900
H       0.360900    0.165500    4.495500
C       0.102600    2.313300    4.460800
H       0.148200    2.425700    5.538600
C      -0.052300    3.440500    3.647300
H      -0.132600    4.426000    4.093200
C      -0.095900    3.302400    2.262400
H      -0.215300    4.183100    1.640000
C       1.514600    2.568100   -0.749700
C       2.639900    2.641400    0.081200
H       2.574600    2.335600    1.118200
C       3.860400    3.091800   -0.425700
H       4.723400    3.132800    0.229300
C       3.969300    3.479900   -1.760800
H       4.916900    3.835700   -2.150500
C       2.853500    3.402400   -2.599300
H       2.933100    3.693100   -3.641100
C       1.636800    2.939600   -2.100500
H       0.778100    2.876100   -2.762700
C      -3.518800   -1.475400   -1.493900
C      -4.859000   -1.575200   -1.095600
H      -5.111600   -1.524500   -0.041200
C      -5.864900   -1.729500   -2.049100
H      -6.899900   -1.804700   -1.733900
C      -5.540900   -1.786300   -3.406800
H      -6.324500   -1.905900   -4.147000
C      -4.208900   -1.682600   -3.811000
H      -3.955300   -1.718800   -4.864800
C      -3.202900   -1.523100   -2.857900
H      -2.168000   -1.421600   -3.172000
C      -1.883600   -2.991300    0.360300
C      -2.739400   -4.070200    0.098300
H      -3.617900   -3.931700   -0.522300
C      -2.463900   -5.330800    0.632500
H      -3.130400   -6.159800    0.419300
C      -1.340900   -5.524500    1.438800
H      -1.134500   -6.504100    1.856000
C      -0.482700   -4.455500    1.707300
H       0.393700   -4.580500    2.333300
C      -0.747200   -3.200400    1.162500
H      -0.058100   -2.389000    1.380200
C       1.583700   -0.719400   -0.253500
N       2.486900   -0.742300    0.518400
Ni     -0.094800   -0.366800   -0.739700
Al      3.638500   -1.028600    2.064100
C       5.089800   -2.264700    1.543000
H       4.696200   -3.106600    0.960200
H       5.834300   -1.752400    0.920400
H       5.601100   -2.673500    2.424000
C       4.026000    0.737800    2.878000
H       4.624100    1.362000    2.198900
H       3.101900    1.276400    3.124900
H       4.596000    0.623500    3.809100
Cl      2.072200   -2.125900    3.322700
C       1.872600   -1.682200   -2.787700
C       1.078100   -1.996400   -1.500600
H       1.797900   -2.597700   -3.395600
H       1.512300   -2.809300   -0.916500
H       0.062100   -2.310900   -1.766900
C       1.200100   -0.552100   -3.580200
H       1.749900   -0.338200   -4.502000
H       0.174400   -0.831900   -3.847300
H       1.154800    0.371000   -2.991000
C       3.354900   -1.456400   -2.527600
C       3.912200   -0.178200   -2.415700
C       4.189200   -2.568300   -2.351700
C       5.268900   -0.017000   -2.132700
H       3.290600    0.703000   -2.525700
C       5.544600   -2.411200   -2.070100
H       3.768200   -3.567400   -2.431800
C       6.090100   -1.130900   -1.960600
H       5.678000    0.983200   -2.037500
H       6.171600   -3.284200   -1.925400
H       7.143500   -1.004500   -1.735500
100
LAN-TS9-10 Molecule Name
P       2.044400   -0.513200   -0.583400
P      -0.695200    1.903000    0.429900
O       0.967800    0.380600    2.065500
C       2.583800   -1.057700    1.097800
C       3.659000   -1.946400    1.257900
H       4.130800   -2.367800    0.377800
C       4.128400   -2.294500    2.522400
H       4.952500   -2.991200    2.619400
C       3.544500   -1.730100    3.656800
H       3.921800   -1.971900    4.643800
C       2.480600   -0.840600    3.528100
H       2.053800   -0.365500    4.401500
C       1.987900   -0.538300    2.257200
C      -0.268900    0.411900    2.711700
C      -1.174300    1.288000    2.091500
C      -2.435300    1.458200    2.669000
H      -3.149900    2.130500    2.209400
C      -2.795200    0.738900    3.810600
H      -3.779600    0.869800    4.243200
C      -1.901000   -0.174100    4.364000
H      -2.192400   -0.774600    5.218000
C      -0.625500   -0.344600    3.820100
H       0.037800   -1.089700    4.234700
C       2.523600   -1.999100   -1.564600
C       1.834400   -3.191200   -1.276000
H       1.085000   -3.212100   -0.491800
C       2.095800   -4.353900   -1.994400
H       1.552300   -5.260300   -1.751200
C       3.043300   -4.342500   -3.022300
H       3.243900   -5.246500   -3.586700
C       3.731200   -3.166000   -3.316300
H       4.473400   -3.152400   -4.107100
C       3.478600   -1.998700   -2.588500
H       4.035900   -1.097600   -2.818400
C       3.324200    0.739100   -1.016000
C       3.258300    1.331700   -2.288900
H       2.482300    1.027500   -2.984500
C       4.175100    2.308600   -2.670500
H       4.116200    2.746900   -3.660900
C       5.161000    2.728000   -1.773300
H       5.872300    3.493000   -2.064900
C       5.222200    2.161900   -0.500900
H       5.976500    2.490700    0.205300
C       4.315000    1.169100   -0.124900
H       4.379100    0.737700    0.866800
C       0.650000    3.111300    0.749200
C       0.887100    3.645600    2.023200
H       0.274500    3.332100    2.861600
C       1.910100    4.573600    2.218800
H       2.087500    4.977200    3.209700
C       2.701400    4.982900    1.143600
H       3.497400    5.703400    1.297800
C       2.466800    4.461200   -0.129200
H       3.084900    4.761700   -0.967200
C       1.449900    3.527400   -0.322800
H       1.289600    3.106600   -1.309400
C      -2.114000    2.979800   -0.024300
C      -2.065000    4.379000    0.066000
H      -1.158600    4.871400    0.399200
C      -3.181800    5.145900   -0.268900
H      -3.130300    6.227000   -0.197500
C      -4.361000    4.525200   -0.683700
H      -5.230100    5.122700   -0.937300
C      -4.419100    3.133300   -0.772400
H      -5.327500    2.639500   -1.096500
C      -3.300200    2.363600   -0.455000
H      -3.354100    1.282300   -0.535700
C      -0.832100   -1.272400    0.102400
N      -1.121600   -2.212200    0.745000
Ni     -0.196900    0.132400   -0.940400
H       0.302400    1.200000   -1.828800
C      -1.268900   -3.831500    3.479200
H      -0.217400   -3.565700    3.659300
H      -1.903800   -3.078100    3.959700
H      -1.459100   -4.794200    3.970600
C      -0.678600   -5.249400    0.400600
H      -0.819600   -5.023300   -0.665500
H       0.399900   -5.251000    0.615200
H      -1.052600   -6.266700    0.571600
Cl     -3.836300   -3.913800    1.063900
Al     -1.639700   -3.931900    1.537100
C      -0.528600    0.470100   -3.076700
C      -1.317200   -0.625800   -2.697400
H      -0.997900    1.432000   -3.263600
H       0.382600    0.281300   -3.638500
C      -2.796900   -0.466300   -2.517100
C      -3.518500   -1.304600   -1.651900
C      -3.510600    0.475100   -3.276600
C      -4.897800   -1.171300   -1.510000
H      -3.013000   -2.055200   -1.058100
C      -4.894100    0.598700   -3.148100
H      -2.990000    1.106100   -3.989000
C      -5.592400   -0.215400   -2.255400
H      -5.415700   -1.823200   -0.815600
H      -5.424000    1.330700   -3.748500
H      -6.667500   -0.116400   -2.150900
C      -0.842000   -2.034000   -3.006800
H      -1.103900   -2.742900   -2.218000
H      -1.327900   -2.378300   -3.929000
H       0.240200   -2.069000   -3.145900
100
LAO-10 Molecule Name
P       1.639400    1.307800   -0.009600
P      -1.398000   -1.049900   -0.069300
O       1.593400   -1.702400   -1.140200
C       2.519100    0.579300   -1.468700
C       3.405200    1.387600   -2.209600
H       3.593500    2.397400   -1.870700
C       4.026900    0.948600   -3.372300
H       4.696600    1.609700   -3.909200
C       3.773500   -0.336900   -3.837200
H       4.235200   -0.701700   -4.746900
C       2.937500   -1.175500   -3.108900
H       2.783700   -2.181100   -3.460400
C       2.331700   -0.728300   -1.936900
C       0.502400   -2.399000   -1.793100
C      -0.837700   -2.119000   -1.488000
C      -1.802600   -2.831900   -2.227300
H      -2.849800   -2.641900   -2.041200
C      -1.462600   -3.791200   -3.176000
H      -2.244900   -4.307100   -3.720000
C      -0.125200   -4.109400   -3.384300
H       0.162100   -4.893800   -4.074100
C       0.852900   -3.414900   -2.682100
H       1.887400   -3.704700   -2.788200
C       1.897500    3.118800   -0.301400
C       1.427200    3.701500   -1.492900
H       0.978700    3.081800   -2.261000
C       1.499700    5.078400   -1.684000
H       1.129400    5.507700   -2.608400
C       2.021000    5.903200   -0.683400
H       2.066400    6.976800   -0.830100
C       2.480800    5.337600    0.504700
H       2.888300    5.968600    1.287300
C       2.427000    3.953400    0.693700
H       2.801700    3.530600    1.618900
C       2.811900    1.026400    1.380100
C       2.287200    0.864300    2.668000
H       1.215500    0.787900    2.808800
C       3.132600    0.748500    3.770900
H       2.710800    0.609500    4.759800
C       4.514700    0.771800    3.594100
H       5.174200    0.664000    4.448300
C       5.050300    0.918900    2.312600
H       6.125200    0.927400    2.168700
C       4.204500    1.055700    1.213800
H       4.630600    1.185700    0.224700
C      -1.122700   -2.191800    1.347000
C      -0.986700   -3.580000    1.208400
H      -1.007900   -4.034100    0.224200
C      -0.823600   -4.389900    2.331900
H      -0.696300   -5.459400    2.207000
C      -0.813500   -3.826300    3.607400
H      -0.677300   -4.456400    4.479100
C      -0.964400   -2.447800    3.757900
H      -0.948400   -2.002000    4.746200
C      -1.110200   -1.637500    2.634300
H      -1.207900   -0.564300    2.759500
C      -3.232300   -1.160800   -0.281500
C      -4.030200   -2.027700    0.477900
H      -3.584100   -2.654300    1.241300
C      -5.406800   -2.099700    0.252200
H      -6.012900   -2.772300    0.849900
C      -5.996600   -1.319900   -0.741400
H      -7.064900   -1.381800   -0.919900
C      -5.208700   -0.448600   -1.496700
H      -5.661000    0.180400   -2.254600
C      -3.839200   -0.356800   -1.262300
H      -3.242300    0.339500   -1.840600
C      -1.107300    2.299600    1.978200
C      -1.805300    2.787900    0.748200
H      -1.752600    2.132800    2.843500
C      -1.170800    1.655500   -1.676600
N      -1.364900    1.935600   -2.806700
Ni     -0.813600    1.202600    0.081400
H      -0.253400    2.919600    2.253800
C      -3.272800    2.498300    0.656600
C      -4.074900    3.182900   -0.273300
C      -3.906600    1.566300    1.499000
C      -5.450800    2.973500   -0.331000
H      -3.618300    3.879200   -0.965400
C      -5.283000    1.361400    1.447500
H      -3.324100    0.972600    2.195500
C      -6.065500    2.072300    0.538700
H      -6.043700    3.519400   -1.057600
H      -5.739100    0.629800    2.105200
H      -7.137200    1.910900    0.495100
C      -1.378600    4.162300    0.256200
H      -1.484800    4.259400   -0.825800
H      -1.991400    4.939800    0.734000
H      -0.333000    4.355800    0.498600
H      -0.663700    1.230400    1.819700
Al      2.845200   -2.893500    0.136500
Cl      2.327000   -2.362900    2.207100
C       2.277900   -4.755900   -0.212700
H       2.645100   -5.359000    0.629100
H       1.191300   -4.884100   -0.249600
H       2.704400   -5.178300   -1.131100
C       4.624400   -2.246000   -0.414700
H       5.369800   -2.652500    0.282100
H       4.894900   -2.574800   -1.426100
H       4.710300   -1.155300   -0.379400
100
LAO-11 Molecule Name
P       2.157200   -0.549200   -0.070500
P      -1.455200    0.146200    0.664500
O       0.716100    2.281300   -0.289700
C       2.899100    1.121700   -0.372400
C       4.292300    1.242400   -0.535600
H       4.907200    0.354000   -0.464000
C       4.897700    2.465500   -0.803500
H       5.972900    2.517900   -0.927400
C       4.117000    3.614800   -0.920200
H       4.572300    4.572800   -1.140700
C       2.738800    3.532700   -0.751000
H       2.114000    4.412800   -0.847300
C       2.154600    2.298500   -0.476500
C       0.317200    2.366300    1.104000
C      -0.531400    1.406300    1.666700
C      -0.771400    1.521400    3.049600
H      -1.419900    0.795100    3.523200
C      -0.211100    2.537800    3.815900
H      -0.414900    2.585200    4.879200
C       0.584000    3.507300    3.205500
H       0.995500    4.328800    3.779800
C       0.846000    3.423200    1.841900
H       1.452700    4.173900    1.356200
C       2.513600   -0.797800    1.718200
C       2.522100   -2.100200    2.252400
H       2.364700   -2.957100    1.607100
C       2.683800   -2.295200    3.623800
H       2.689000   -3.305000    4.019000
C       2.820200   -1.202200    4.482000
H       2.933000   -1.358200    5.549200
C       2.811100    0.090700    3.959600
H       2.913000    0.947600    4.616200
C       2.669200    0.292400    2.586800
H       2.672100    1.305600    2.203000
C       3.380500   -1.611400   -0.947400
C       4.472600   -2.237300   -0.333400
H       4.641800   -2.119600    0.730700
C       5.346300   -3.025200   -1.086100
H       6.182000   -3.513900   -0.597700
C       5.144900   -3.187100   -2.456500
H       5.821100   -3.804800   -3.036900
C       4.065500   -2.556100   -3.078800
H       3.900500   -2.680000   -4.143300
C       3.188800   -1.777900   -2.327300
H       2.340700   -1.303800   -2.811100
C      -3.046100    1.073100    0.460900
C      -3.290500    2.348600    0.988900
H      -2.535200    2.865100    1.567700
C      -4.510800    2.988000    0.759300
H      -4.676200    3.979800    1.165500
C      -5.506400    2.362400    0.009300
H      -6.451000    2.864400   -0.169200
C      -5.275900    1.088800   -0.513600
H      -6.035200    0.586400   -1.102800
C      -4.055600    0.455100   -0.293800
H      -3.885900   -0.525700   -0.715500
C      -1.926100   -1.077300    1.970600
C      -3.254100   -1.368600    2.313900
H      -4.072300   -0.827800    1.855300
C      -3.538600   -2.364100    3.251200
H      -4.572000   -2.580100    3.500700
C      -2.505900   -3.072700    3.865300
H      -2.731800   -3.847300    4.590000
C      -1.181000   -2.781100    3.537700
H      -0.364700   -3.327400    3.996200
C      -0.896900   -1.797100    2.595100
H       0.134300   -1.595700    2.341600
C      -0.495400   -0.647800   -2.967000
C      -0.922000   -1.969400   -2.384500
C       0.349700   -2.911000   -0.179100
N       0.538500   -3.976600    0.290500
Ni      0.119000   -1.227000   -0.916900
H       0.219700   -0.742700   -3.787000
H      -1.312300    0.015700   -3.250300
C      -2.393500   -2.166900   -2.125000
C      -2.837100   -2.927800   -1.029600
C      -3.353800   -1.684500   -3.029400
C      -4.195500   -3.174000   -0.834700
H      -2.109400   -3.309500   -0.322900
C      -4.714200   -1.935900   -2.837800
H      -3.040100   -1.117600   -3.900400
C      -5.141400   -2.678300   -1.736200
H      -4.512100   -3.745700    0.030900
H      -5.436500   -1.552700   -3.551100
H      -6.197700   -2.870400   -1.582200
C      -0.299400   -3.193700   -3.058400
H      -0.496600   -4.096800   -2.478400
H      -0.734200   -3.325500   -4.060800
H       0.785300   -3.090700   -3.155600
H       0.059300    0.008900   -2.186800
Al     -0.314600    3.034600   -1.947000
C       1.022200    2.573900   -3.334600
H       1.542700    1.628300   -3.132200
H       0.498300    2.462900   -4.293800
H       1.789200    3.345900   -3.460500
C      -2.172400    2.483800   -2.273100
H      -2.386000    1.420900   -2.142100
H      -2.891500    3.042600   -1.668100
H      -2.359900    2.732600   -3.329400
Cl     -0.294100    5.156600   -1.231300
100
LAO-12 Molecule Name
P      -1.892100    1.223800    0.073900
P       1.094800   -0.802900    0.585700
O      -1.948900   -1.925700    0.199800
C      -3.215600    0.112100    0.745700
C      -4.424500    0.662300    1.213600
H      -4.503200    1.738000    1.316800
C      -5.523800   -0.132200    1.516400
H      -6.438700    0.324800    1.874900
C      -5.456900   -1.512100    1.314400
H      -6.323400   -2.137500    1.493300
C      -4.274700   -2.086200    0.862500
H      -4.225500   -3.145100    0.648000
C      -3.164200   -1.276000    0.629000
C      -1.165600   -2.505700    1.274800
C       0.104100   -2.018800    1.601200
C       0.735700   -2.630800    2.703200
H       1.714300   -2.280000    3.001500
C       0.154600   -3.670800    3.416700
H       0.679000   -4.106500    4.259100
C      -1.086200   -4.167100    3.021200
H      -1.537400   -5.008800    3.532800
C      -1.742800   -3.583800    1.946100
H      -2.681000   -3.991700    1.607300
C      -1.656800    2.452200    1.421200
C      -0.995200    3.647300    1.081700
H      -0.755800    3.847400    0.041400
C      -0.628500    4.553900    2.074000
H      -0.122100    5.473100    1.800600
C      -0.903000    4.276000    3.416800
H      -0.613000    4.981500    4.188100
C      -1.548900    3.088600    3.761100
H      -1.757200    2.864300    4.801500
C      -1.926000    2.180000    2.768900
H      -2.416800    1.254500    3.050300
C      -2.913100    2.125000   -1.167700
C      -3.698600    3.246700   -0.870500
H      -3.688600    3.670300    0.128700
C      -4.480000    3.842800   -1.861100
H      -5.078400    4.715400   -1.621900
C      -4.488500    3.320600   -3.155500
H      -5.098800    3.782900   -3.923800
C      -3.698500    2.211600   -3.462500
H      -3.687200    1.810500   -4.469800
C      -2.905200    1.625300   -2.477600
H      -2.257700    0.792000   -2.730100
C       2.291300   -2.009400   -0.144900
C       1.915700   -3.326600   -0.450800
H       0.931400   -3.701000   -0.190400
C       2.798800   -4.179200   -1.115300
H       2.482400   -5.188500   -1.353300
C       4.071900   -3.734800   -1.474200
H       4.755300   -4.399400   -1.991600
C       4.458600   -2.429600   -1.165100
H       5.443000   -2.064700   -1.437800
C       3.574800   -1.573300   -0.510000
H       3.888600   -0.561300   -0.287400
C       2.086800    0.029700    1.912000
C       3.274800   -0.482800    2.456700
H       3.688000   -1.412800    2.082400
C       3.948600    0.204600    3.466700
H       4.867500   -0.205300    3.871900
C       3.446500    1.413600    3.951500
H       3.970100    1.943900    4.739800
C       2.272500    1.939500    3.409800
H       1.871200    2.881100    3.768200
C       1.604300    1.255600    2.394200
H       0.708200    1.686600    1.965600
C       2.593200    0.200700   -3.507800
C       2.582000    1.512000   -2.686800
H       2.601500   -0.671800   -2.850800
C       1.274600    1.544000   -1.946400
N       0.212700    2.163400   -1.951700
Ni      0.118600    0.690300   -0.658400
H       1.695700    0.150900   -4.131600
H       3.465000    0.160800   -4.167900
C       3.756000    1.592800   -1.706700
C       3.586900    2.134100   -0.426700
C       5.034700    1.156800   -2.081000
C       4.652800    2.200300    0.471400
H       2.606000    2.476900   -0.115700
C       6.102900    1.222600   -1.186300
H       5.200100    0.742700   -3.069300
C       5.913500    1.735200    0.099000
H       4.486700    2.595900    1.467100
H       7.082100    0.868400   -1.492100
H       6.739700    1.773000    0.800600
C       2.643800    2.728500   -3.644000
H       2.582100    3.663800   -3.080300
H       3.587100    2.716300   -4.200400
H       1.810100    2.695300   -4.351900
Al     -1.931700   -2.543400   -1.760100
C      -3.735700   -2.006600   -2.361000
H      -3.982700   -0.964400   -2.123200
H      -3.775800   -2.109200   -3.454500
H      -4.525200   -2.642100   -1.944600
C      -0.362500   -1.863700   -2.727700
H       0.569400   -2.382300   -2.486400
H      -0.553200   -2.002100   -3.802200
H      -0.201700   -0.791300   -2.555200
Cl     -1.803500   -4.724100   -1.289500
93
LAO-1 Molecule Name
P      -1.890600    0.578300    0.035400
P       1.591800   -0.369900    0.171800
O      -0.862900   -2.439000    0.257900
C      -2.819400   -0.952900    0.543100
C      -4.186700   -0.867200    0.869200
H      -4.661800    0.105900    0.865300
C      -4.949800   -1.992200    1.163500
H      -6.000600   -1.881400    1.404700
C      -4.366200   -3.258100    1.117300
H      -4.955000   -4.147300    1.308900
C      -3.016300   -3.377500    0.807700
H      -2.555600   -4.352500    0.723900
C      -2.261600   -2.233100    0.552000
C       0.030900   -2.478500    1.397300
C       1.143600   -1.630300    1.472100
C       1.947000   -1.763100    2.622200
H       2.803300   -1.108800    2.733500
C       1.668700   -2.683600    3.627200
H       2.315100   -2.746800    4.494900
C       0.559700   -3.517600    3.508700
H       0.328800   -4.247100    4.276000
C      -0.258600   -3.414500    2.388200
H      -1.119100   -4.060200    2.292800
C      -1.748700    1.480600    1.634300
C      -1.366200    2.833500    1.567900
H      -1.264800    3.311500    0.597900
C      -1.095300    3.548600    2.731800
H      -0.803700    4.591000    2.665200
C      -1.181700    2.920100    3.978300
H      -0.963600    3.475000    4.884700
C      -1.547800    1.576100    4.052200
H      -1.612900    1.081800    5.015500
C      -1.835900    0.859700    2.886600
H      -2.118800   -0.185100    2.959200
C      -3.228200    1.485600   -0.847300
C      -4.135400    2.357400   -0.227600
H      -4.068400    2.543200    0.839800
C      -5.116800    3.005200   -0.979500
H      -5.809400    3.683000   -0.491600
C      -5.202200    2.785100   -2.355100
H      -5.963800    3.290400   -2.939500
C      -4.296200    1.925700   -2.979700
H      -4.347400    1.765600   -4.050900
C      -3.307000    1.286300   -2.233700
H      -2.577100    0.651200   -2.725100
C       2.896200   -1.258600   -0.784300
C       3.860800   -2.094100   -0.199300
H       3.850000   -2.273300    0.870400
C       4.830600   -2.713600   -0.984500
H       5.565300   -3.363400   -0.521500
C       4.849500   -2.507000   -2.366600
H       5.600600   -2.995700   -2.977900
C       3.895800   -1.679100   -2.957900
H       3.896300   -1.523500   -4.031000
C       2.923200   -1.058400   -2.171200
H       2.160400   -0.441300   -2.632300
C       2.584700    0.801400    1.204000
C       3.951700    1.037100    1.005400
H       4.496800    0.477200    0.254100
C       4.624900    1.992400    1.773600
H       5.682500    2.165200    1.605700
C       3.942300    2.718900    2.748400
H       4.466200    3.459800    3.342600
C       2.577700    2.492600    2.950600
H       2.031300    3.056500    3.698600
C       1.904600    1.546800    2.182600
H       0.845200    1.384200    2.345200
C       2.607800    4.009300   -1.902900
C       2.406500    2.508000   -2.227900
H       3.665000    4.225100   -2.118700
H       3.133800    1.912500   -1.667600
H       2.597500    2.333900   -3.295600
C       2.356300    4.292200   -0.414500
H       2.555900    5.345000   -0.183800
H       1.313800    4.077200   -0.153100
H       2.996600    3.673000    0.221500
C       1.737900    4.902900   -2.796900
H       1.926800    5.961200   -2.584300
H       1.946500    4.725100   -3.858200
H       0.675900    4.698700   -2.622500
C       1.031400    2.032800   -1.914100
N      -0.155400    2.312300   -2.055800
Ni      0.081500    0.710500   -0.894600
Al     -0.435900   -3.305800   -1.561500
Cl     -0.505400   -1.529300   -2.900100
C       1.303400   -4.179100   -1.234900
H       1.167700   -5.262300   -1.358700
H       2.062100   -3.852100   -1.954800
H       1.713900   -4.007600   -0.234000
C      -1.991500   -4.443900   -1.999900
H      -2.074800   -5.333200   -1.361400
H      -2.945500   -3.906400   -1.976400
H      -1.848000   -4.800000   -3.030100
93
LAO-2 Molecule Name
P      -1.911500    0.217000    0.059700
P       1.632400    0.333200    0.304100
O      -0.049400   -2.409000    0.455100
C      -2.353400   -1.533300    0.530000
C      -3.709500   -1.826600    0.779200
H      -4.438800   -1.030700    0.701100
C      -4.143800   -3.108100    1.098100
H      -5.197000   -3.288200    1.277900
C      -3.226600   -4.156500    1.166600
H      -3.552600   -5.165500    1.388700
C      -1.880500   -3.899000    0.939500
H      -1.155400   -4.700900    0.963000
C      -1.466300   -2.600900    0.643000
C       0.680300   -2.051300    1.650700
C       1.394700   -0.850400    1.725500
C       2.023000   -0.583400    2.958900
H       2.563800    0.347300    3.075300
C       1.955500   -1.460800    4.035900
H       2.450700   -1.208800    4.966300
C       1.259900   -2.661000    3.908300
H       1.212200   -3.365500    4.730000
C       0.621200   -2.955300    2.708500
H       0.075800   -3.881800    2.599900
C      -2.155200    1.062800    1.677100
C      -2.377300    2.451500    1.709500
H      -2.501900    3.002800    0.783700
C      -2.397000    3.129700    2.928000
H      -2.571400    4.199800    2.936100
C      -2.176900    2.443200    4.124300
H      -2.183700    2.976600    5.068700
C      -1.947900    1.066800    4.099400
H      -1.773200    0.525600    5.022900
C      -1.943400    0.378700    2.885100
H      -1.764700   -0.691200    2.887100
C      -3.385700    0.590300   -0.970200
C      -4.538000    1.229300   -0.500800
H      -4.605900    1.547500    0.534100
C      -5.599600    1.483600   -1.370800
H      -6.483900    1.992900   -1.003600
C      -5.518000    1.097300   -2.708300
H      -6.339700    1.305400   -3.384800
C      -4.370500    0.455700   -3.179300
H      -4.296000    0.165400   -4.221200
C      -3.305400    0.207000   -2.317300
H      -2.402300   -0.264800   -2.693900
C       3.243200   -0.266100   -0.362200
C       4.346000   -0.504400    0.474600
H       4.267100   -0.341100    1.543600
C       5.552100   -0.955100   -0.056600
H       6.394100   -1.140100    0.601200
C       5.675500   -1.168500   -1.432200
H       6.614800   -1.519900   -1.844800
C       4.587400   -0.932000   -2.270400
H       4.671600   -1.096900   -3.338500
C       3.375900   -0.487000   -1.737900
H       2.529000   -0.327200   -2.391000
C       2.091200    1.874200    1.208500
C       3.266100    2.583300    0.926900
H       3.990100    2.185700    0.225100
C       3.508900    3.815600    1.538300
H       4.419200    4.356900    1.305000
C       2.586300    4.349600    2.436700
H       2.775300    5.308900    2.905600
C       1.413200    3.647500    2.724000
H       0.682400    4.054000    3.414000
C       1.164800    2.422600    2.111600
H       0.246200    1.894300    2.338000
C       1.285300    1.736300   -3.497700
C       1.315900    2.131900   -2.007700
H       1.294100    0.641000   -3.585800
H       1.127000    3.202900   -1.887900
H       2.321700    1.944200   -1.611000
C       2.567300    2.265200   -4.176400
H       2.593200    1.990500   -5.238000
H       2.609400    3.359400   -4.105700
H       3.465300    1.859700   -3.694000
C       0.043500    2.232200   -4.251700
H       0.140300    2.016400   -5.322900
H      -0.866600    1.752100   -3.883800
H      -0.084900    3.313100   -4.124200
C      -1.154600    2.548800   -1.406400
N      -1.819400    3.511400   -1.556000
Ni     -0.033300    1.127300   -0.952200
Al      0.757900   -3.314800   -1.197500
Cl      0.173000   -1.728600   -2.649000
C       2.625800   -3.585200   -0.634600
H       2.967300   -2.918100    0.162300
H       2.727500   -4.618900   -0.276100
H       3.319000   -3.456300   -1.474100
C      -0.310700   -4.921800   -1.620500
H       0.046400   -5.299600   -2.589400
H      -0.181600   -5.734800   -0.894000
H      -1.380600   -4.716600   -1.731300
93
LAO-3 Molecule Name
P      -1.886500   -0.052800    0.207000
P       1.526600    0.936000   -0.287800
O       0.644900   -2.010000    0.917400
C      -1.829300   -1.697000    1.062200
C      -3.033100   -2.207400    1.589900
H      -3.939900   -1.630200    1.461600
C      -3.100300   -3.420100    2.266100
H      -4.051100   -3.772600    2.647800
C      -1.939600   -4.165700    2.454000
H      -1.965600   -5.115000    2.975400
C      -0.728000   -3.672100    1.983200
H       0.180800   -4.230600    2.144500
C      -0.676500   -2.457200    1.300100
C       1.282600   -1.077700    1.829900
C       1.752400    0.174400    1.408400
C       2.484700    0.898700    2.372300
H       2.891300    1.862800    2.098100
C       2.688100    0.439600    3.668600
H       3.254400    1.043000    4.368100
C       2.167600   -0.792700    4.055700
H       2.315800   -1.169400    5.060800
C       1.475200   -1.556300    3.124300
H       1.093600   -2.531300    3.397400
C      -1.931600    1.056700    1.697100
C      -2.160600    2.436400    1.549700
H      -2.284400    2.873000    0.567100
C      -2.150900    3.282700    2.658900
H      -2.335500    4.341300    2.513700
C      -1.869000    2.782100    3.929500
H      -1.846000    3.445500    4.787300
C      -1.605900    1.421100    4.085100
H      -1.372200    1.017000    5.064100
C      -1.649700    0.565500    2.984200
H      -1.454300   -0.487400    3.142300
C      -3.602300   -0.073300   -0.475600
C      -4.416800    1.065800   -0.482600
H      -4.111700    1.966200    0.032000
C      -5.633900    1.061600   -1.167600
H      -6.246400    1.956300   -1.167000
C      -6.055800   -0.076500   -1.853100
H      -6.999100   -0.073700   -2.387700
C      -5.253900   -1.220000   -1.847900
H      -5.569900   -2.112400   -2.376900
C      -4.037600   -1.216700   -1.169300
H      -3.424400   -2.111800   -1.177600
C       3.151600    0.544300   -1.058700
C       4.354900    1.122300   -0.619600
H       4.345500    1.874700    0.161300
C       5.567200    0.743200   -1.190700
H       6.489900    1.195300   -0.843700
C       5.595800   -0.219300   -2.204600
H       6.542100   -0.516000   -2.643800
C       4.407300   -0.797700   -2.645600
H       4.416500   -1.555700   -3.420500
C       3.191300   -0.414400   -2.076400
H       2.276600   -0.897100   -2.394100
C       1.669100    2.736400    0.068400
C       2.250800    3.573200   -0.894900
H       2.735000    3.145100   -1.766200
C       2.194600    4.959000   -0.754300
H       2.641700    5.592700   -1.512200
C       1.552300    5.528400    0.345000
H       1.499700    6.606600    0.447500
C       0.962600    4.703100    1.302700
H       0.445700    5.133100    2.153800
C       1.015500    3.318700    1.163500
H       0.531700    2.695300    1.906700
H       0.016100   -0.864700   -1.289300
C      -1.037200    2.347300   -1.459300
N      -1.442900    3.448700   -1.576600
Ni     -0.420800    0.531100   -1.375100
C      -1.262400    0.013600   -3.539100
C       0.017100    0.514000   -3.514600
H       0.209000    1.568400   -3.682100
H       0.859000   -0.162700   -3.599600
C      -1.507800   -1.472100   -3.665400
H      -2.392000   -1.774300   -3.099900
H      -1.705200   -1.709400   -4.720300
H      -0.654400   -2.060200   -3.325500
C      -2.465000    0.885400   -3.814500
H      -3.290000    0.651500   -3.135800
H      -2.235800    1.946800   -3.721300
H      -2.816100    0.682600   -4.836100
Al      2.012300   -3.341400   -0.010000
Cl      1.298400   -3.356100   -2.107100
C       3.754200   -2.542700    0.448800
H       3.807900   -1.453800    0.493100
H       4.063000   -2.936800    1.427000
H       4.497700   -2.869700   -0.290200
C       1.772600   -5.184300    0.678600
H       2.525000   -5.783600    0.144500
H       1.985200   -5.300600    1.750100
H       0.797200   -5.628500    0.454500
81
LAO-4 Molecule Name
P      -1.865800    0.362700   -0.130900
P       1.719900    0.503200   -0.305900
O       0.043400   -2.009600    0.850000
C      -2.144500   -0.924000    1.166400
C      -3.351300   -0.889000    1.891700
H      -4.035900   -0.065900    1.721200
C      -3.693400   -1.889600    2.793800
H      -4.633500   -1.835200    3.329600
C      -2.832900   -2.971600    2.983100
H      -3.103100   -3.780000    3.652000
C      -1.613000   -3.008400    2.316200
H      -0.945300   -3.847900    2.447700
C      -1.268400   -1.968200    1.453200
C       1.103800   -1.492700    1.688800
C       1.792100   -0.314000    1.361800
C       2.691100    0.172800    2.330100
H       3.216200    1.098200    2.134200
C       2.935800   -0.497500    3.524200
H       3.635300   -0.084900    4.241600
C       2.300700   -1.711900    3.773100
H       2.508500   -2.271000    4.677500
C       1.380500   -2.205400    2.853900
H       0.880100   -3.142000    3.046400
C      -2.001900    1.839500    0.982100
C      -1.057200    1.939700    2.018300
H      -0.310400    1.162500    2.149300
C      -1.056400    3.032800    2.879100
H      -0.313200    3.095200    3.666000
C      -2.000800    4.049700    2.718500
H      -1.998100    4.905500    3.384600
C      -2.949100    3.955000    1.701700
H      -3.693700    4.733600    1.576900
C      -2.954900    2.854500    0.839200
H      -3.711100    2.792200    0.066500
C      -3.449600    0.328100   -1.066100
C      -3.689600    1.383900   -1.961700
H      -2.959300    2.177600   -2.075100
C      -4.830000    1.392500   -2.759900
H      -4.989700    2.208600   -3.454600
C      -5.732900    0.330600   -2.701400
H      -6.611600    0.328200   -3.336700
C      -5.482200   -0.743200   -1.848600
H      -6.161700   -1.587800   -1.821400
C      -4.347700   -0.747300   -1.036300
H      -4.161900   -1.602800   -0.399200
C       3.365100    0.036000   -1.002900
C       4.298200   -0.773100   -0.345300
H       4.057100   -1.235000    0.603600
C       5.541200   -1.031300   -0.926600
H       6.246700   -1.674800   -0.412800
C       5.866200   -0.481900   -2.165200
H       6.830100   -0.687800   -2.617300
C       4.938800    0.324400   -2.828500
H       5.176700    0.748200   -3.797600
C       3.696300    0.578000   -2.254100
H       2.978200    1.193700   -2.786200
C       2.028600    2.294900    0.029600
C       3.303100    2.794200    0.351300
H       4.154800    2.122500    0.387900
C       3.494100    4.155800    0.578700
H       4.483300    4.526100    0.824600
C       2.420500    5.043000    0.468800
H       2.572200    6.102800    0.642200
C       1.161300    4.565300    0.108200
H       0.326500    5.247700   -0.003800
C       0.970300    3.202100   -0.119100
H      -0.004500    2.845700   -0.427700
H       0.950200    0.420800   -2.554600
C      -0.986000    0.390200   -3.135900
N      -1.539000    0.457900   -4.174400
Ni     -0.074200    0.320900   -1.525800
Al      0.173800   -3.511200   -0.571600
Cl      2.048800   -2.941300   -1.561900
C      -1.490000   -3.176400   -1.566300
H      -1.538000   -3.837200   -2.441700
H      -2.384600   -3.368600   -0.960000
H      -1.543100   -2.151400   -1.954400
C       0.478700   -5.112200    0.554300
H      -0.445300   -5.538600    0.964700
H       0.947600   -5.889000   -0.063700
H       1.175000   -4.912000    1.379900
100
LAO-5 Molecule Name
P       2.251500   -0.655000    0.439200
P      -1.527700    0.846500    0.611100
O       1.007200    1.979600   -1.228600
C       3.038100    0.646400   -0.628300
C       4.431300    0.516400   -0.806100
H       4.928500   -0.343400   -0.374800
C       5.189900    1.443000   -1.507200
H       6.257100    1.294300   -1.619500
C       4.565300    2.556800   -2.064100
H       5.132000    3.292400   -2.622000
C       3.192600    2.708500   -1.921700
H       2.695100    3.535700   -2.405600
C       2.438600    1.766800   -1.214900
C       0.409800    2.884300   -0.262700
C      -0.739600    2.538900    0.479200
C      -1.313500    3.578400    1.239400
H      -2.206700    3.366900    1.812000
C      -0.768100    4.856100    1.311600
H      -1.252000    5.614100    1.916000
C       0.399600    5.141100    0.613900
H       0.856100    6.122300    0.666400
C       0.975400    4.155200   -0.181200
H       1.868600    4.387900   -0.740200
C       3.330000   -0.438100    1.921700
C       2.926500    0.535700    2.846800
H       1.978400    1.044500    2.711400
C       3.714300    0.827100    3.957800
H       3.383100    1.574100    4.670000
C       4.911300    0.140500    4.165900
H       5.518700    0.358100    5.037600
C       5.318000   -0.835600    3.256000
H       6.243700   -1.377600    3.416100
C       4.535000   -1.121900    2.136800
H       4.864300   -1.885900    1.440600
C       2.814800   -2.204800   -0.358800
C       2.953700   -3.363900    0.423000
H       2.819600   -3.312500    1.499400
C       3.252900   -4.585900   -0.178300
H       3.356800   -5.474200    0.434600
C       3.405700   -4.665900   -1.564200
H       3.630800   -5.618100   -2.031600
C       3.254900   -3.520300   -2.346900
H       3.354600   -3.578800   -3.424800
C       2.958900   -2.294200   -1.750300
H       2.812100   -1.419200   -2.373200
C      -2.737800    0.813300   -0.757500
C      -3.738300    1.792100   -0.882800
H      -3.771000    2.628000   -0.191200
C      -4.693800    1.691900   -1.888900
H      -5.464400    2.449400   -1.979100
C      -4.651000    0.621300   -2.788900
H      -5.396700    0.544600   -3.572700
C      -3.649000   -0.340700   -2.682100
H      -3.604200   -1.169300   -3.378000
C      -2.696400   -0.246100   -1.665800
H      -1.915600   -0.989400   -1.580900
C      -2.596600    1.013200    2.109200
C      -3.976000    0.764900    2.078800
H      -4.469400    0.534400    1.143500
C      -4.727400    0.790000    3.256200
H      -5.793100    0.591300    3.213100
C      -4.112900    1.064700    4.476400
H      -4.695900    1.078000    5.390800
C      -2.738100    1.306800    4.518600
H      -2.244500    1.494000    5.465100
C      -1.985800    1.273800    3.348300
H      -0.914100    1.421400    3.404000
H       0.172200   -0.291800   -0.636100
C       0.112500   -0.934300    2.667300
N       0.110100   -1.243300    3.805500
Ni      0.130900   -0.537000    0.816200
C      -1.243000   -3.432600   -0.177400
C      -0.582900   -3.480400    0.993300
H       0.485200   -3.657100    1.020300
H      -1.072000   -3.380300    1.954000
C      -0.514800   -3.656100   -1.483300
H      -0.693700   -2.844400   -2.197600
H       0.561700   -3.719700   -1.314900
H      -0.830800   -4.593200   -1.958700
C      -2.715500   -3.207300   -0.227800
C      -3.473900   -3.647900   -1.323800
C      -3.382900   -2.531000    0.808800
C      -4.851500   -3.434500   -1.378500
H      -2.988200   -4.162400   -2.145200
C      -4.760000   -2.328900    0.759100
H      -2.818600   -2.138700    1.649200
C      -5.502000   -2.775400   -0.336300
H      -5.415200   -3.785000   -2.236800
H      -5.250800   -1.812700    1.577200
H      -6.572700   -2.607300   -0.378300
Al      0.208400    1.842100   -3.184800
C      -1.482000    2.841400   -3.076800
H      -1.418500    3.652000   -3.815900
H      -2.342200    2.216900   -3.338400
H      -1.690000    3.294400   -2.103100
C       1.501600    2.578000   -4.492300
H       1.657300    3.661100   -4.399600
H       2.475200    2.078200   -4.497500
H       1.044500    2.407600   -5.478800
Cl      0.275200   -0.364900   -3.421600
100
LAO-6 Molecule Name
P       2.116000   -0.588900    0.227800
P      -1.372700    0.797800    0.585300
O       1.015000    1.867200   -1.438900
C       3.030100    0.521900   -0.949900
C       4.411400    0.348500   -1.163200
H       4.909800   -0.486300   -0.685000
C       5.147700    1.211900   -1.965200
H       6.208600    1.043700   -2.108400
C       4.516000    2.292400   -2.582600
H       5.073500    2.969000   -3.219100
C       3.155500    2.494900   -2.385000
H       2.646300    3.305800   -2.888100
C       2.436200    1.616600   -1.573400
C       0.597100    2.756900   -0.371500
C      -0.437800    2.420100    0.522700
C      -0.777600    3.415700    1.462900
H      -1.569300    3.207900    2.170500
C      -0.125400    4.641900    1.538600
H      -0.426500    5.365100    2.287200
C       0.906200    4.926300    0.650600
H       1.431700    5.872900    0.690500
C       1.256000    3.982800   -0.308700
H       2.050200    4.205100   -1.005800
C       2.981800    0.015400    1.746300
C       2.387500    1.096100    2.413100
H       1.437700    1.485300    2.064700
C       2.997000    1.672600    3.524700
H       2.519100    2.506200    4.027800
C       4.208400    1.165400    3.996100
H       4.679000    1.601800    4.870300
C       4.807700    0.088200    3.342600
H       5.746300   -0.314900    3.707500
C       4.203200   -0.479800    2.220200
H       4.682200   -1.318100    1.726400
C       2.890500   -2.214900   -0.136700
C       2.996800   -3.171500    0.888100
H       2.716900   -2.909600    1.904200
C       3.429900   -4.466600    0.601700
H       3.507500   -5.193100    1.403000
C       3.748400   -4.829500   -0.708500
H       4.080900   -5.838100   -0.928500
C       3.625200   -3.892000   -1.735100
H       3.853700   -4.169500   -2.758300
C       3.195000   -2.594500   -1.454000
H       3.079000   -1.883500   -2.265300
C      -2.771900    1.160100   -0.562100
C      -3.514500    2.347400   -0.434900
H      -3.220300    3.097400    0.291400
C      -4.636000    2.570700   -1.227200
H      -5.196900    3.492400   -1.118900
C      -5.034900    1.609800   -2.162100
H      -5.911800    1.782200   -2.776600
C      -4.301000    0.434100   -2.302300
H      -4.597000   -0.319700   -3.022200
C      -3.173700    0.212300   -1.507000
H      -2.613200   -0.700800   -1.635800
C      -2.248800    0.891600    2.213700
C      -3.634000    0.681800    2.300900
H      -4.227200    0.571400    1.401300
C      -4.261600    0.598800    3.545500
H      -5.332500    0.432100    3.593600
C      -3.518800    0.728300    4.718200
H      -4.006700    0.657900    5.684100
C      -2.139600    0.930800    4.642300
H      -1.545600    1.000900    5.546000
C      -1.509300    1.002900    3.403300
H      -0.431600    1.107500    3.369800
C      -1.053900   -2.914300   -0.549200
C      -0.450200   -3.176700    0.794200
H       0.512800   -3.684200    0.792100
H      -1.110400   -3.528900    1.580700
C      -0.363900   -3.689400   -1.683700
H      -0.632300   -3.300300   -2.668800
H       0.719700   -3.603100   -1.577700
H      -0.636200   -4.748200   -1.624400
C       0.164100   -1.438200    2.530000
N       0.469300   -1.589300    3.659100
Ni     -0.226500   -1.268000    0.728300
C      -2.579700   -2.953500   -0.556100
C      -3.295000   -3.423100   -1.662900
C      -3.300800   -2.448200    0.538000
C      -4.692200   -3.380500   -1.681800
H      -2.769500   -3.815600   -2.525000
C      -4.692500   -2.408600    0.521400
H      -2.768300   -2.057600    1.400000
C      -5.396500   -2.871300   -0.592300
H      -5.225900   -3.747400   -2.552300
H      -5.223200   -2.006900    1.378200
H      -6.480300   -2.833400   -0.610000
H      -0.799200   -1.793800   -0.841100
Al      0.005200    1.673800   -3.245600
C      -1.491800    2.936100   -3.051600
H      -1.367200    3.713600   -3.817800
H      -2.462900    2.457200   -3.216300
H      -1.537900    3.431500   -2.076500
C       1.228000    2.017300   -4.762100
H       1.493200    3.075700   -4.882700
H       2.147800    1.424400   -4.735500
H       0.678800    1.720900   -5.668200
Cl     -0.227800   -0.535400   -3.144400
100
LAO-7 Molecule Name
P       0.909200    1.500100    0.355500
P      -1.400700   -1.371500    0.268300
O      -2.255900    1.683800   -0.373000
C      -0.182700    2.969400   -0.005500
C       0.410200    4.247100    0.051500
H       1.479100    4.318200    0.211100
C      -0.329300    5.413600   -0.096400
H       0.167000    6.375500   -0.047600
C      -1.706400    5.340000   -0.309400
H      -2.296400    6.239900   -0.434300
C      -2.319400    4.095800   -0.379500
H      -3.377600    4.018100   -0.590300
C      -1.555900    2.937500   -0.228200
C      -2.825600    1.106600    0.821200
C      -2.554500   -0.222800    1.178400
C      -3.190900   -0.690400    2.346500
H      -3.005000   -1.707600    2.667200
C      -4.026600    0.114000    3.115600
H      -4.487100   -0.289900    4.009500
C      -4.260600    1.431400    2.732000
H      -4.905000    2.074500    3.319300
C      -3.661600    1.924000    1.577000
H      -3.839400    2.945800    1.274300
C       1.212800    1.921700    2.123800
C       0.304300    1.379900    3.045000
H      -0.485900    0.720100    2.701400
C       0.400600    1.681200    4.402000
H      -0.308300    1.249800    5.100200
C       1.411200    2.528900    4.857100
H       1.498300    2.755500    5.913900
C       2.312500    3.081300    3.946500
H       3.100000    3.741100    4.293800
C       2.211000    2.787400    2.586500
H       2.920100    3.227200    1.895100
C       2.384500    1.980200   -0.633600
C       3.696200    1.842100   -0.157200
H       3.881200    1.444600    0.832700
C       4.776900    2.151500   -0.984100
H       5.784400    2.045500   -0.597800
C       4.566100    2.557100   -2.301600
H       5.410000    2.781900   -2.944800
C       3.263300    2.653600   -2.795700
H       3.088700    2.942800   -3.825900
C       2.177400    2.374500   -1.967200
H       1.170900    2.447800   -2.367100
C      -2.532100   -2.219000   -0.905400
C      -3.799100   -2.675600   -0.506600
H      -4.158900   -2.476400    0.497500
C      -4.607800   -3.380700   -1.394100
H      -5.584900   -3.726200   -1.075500
C      -4.163700   -3.631600   -2.695400
H      -4.794800   -4.178400   -3.387400
C      -2.912400   -3.171200   -3.104100
H      -2.566300   -3.350400   -4.115500
C      -2.098500   -2.469700   -2.212500
H      -1.137600   -2.094300   -2.537800
C      -1.108000   -2.671300    1.558100
C      -1.606000   -3.977300    1.463500
H      -2.245300   -4.263300    0.637600
C      -1.266800   -4.936200    2.422100
H      -1.656300   -5.944200    2.328200
C      -0.425300   -4.605200    3.482100
H      -0.155800   -5.353400    4.219400
C       0.088800   -3.309600    3.577600
H       0.772000   -3.046700    4.376900
C      -0.244600   -2.353500    2.622900
H       0.210900   -1.372100    2.686900
C       2.158400   -2.575400   -1.808200
C       1.155200   -2.601200   -0.628900
H       2.081700   -3.573000   -2.276600
H       1.542900   -3.169000    0.220800
H       0.230200   -3.088600   -0.965800
C       1.762900   -1.555800   -2.885700
H       2.469400   -1.573100   -3.723100
H       0.767600   -1.774100   -3.282000
H       1.736200   -0.535200   -2.486200
C       2.350200   -0.839200    0.916000
N       3.217100   -0.894400    1.713400
Ni      0.732800   -0.766300   -0.026200
C       3.608600   -2.443400   -1.364300
C       4.383800   -1.310700   -1.631300
C       4.201600   -3.503400   -0.664200
C       5.710400   -1.237100   -1.203600
H       3.953100   -0.463600   -2.153600
C       5.521900   -3.430900   -0.228800
H       3.612200   -4.391100   -0.449300
C       6.284800   -2.292700   -0.499200
H       6.290000   -0.344800   -1.417500
H       5.956400   -4.259600    0.320700
H       7.313600   -2.230700   -0.160300
Al     -2.966600    1.387900   -2.301500
Cl     -1.025700    0.663700   -3.098400
C      -4.517000    0.208800   -2.020700
H      -5.409900    0.748500   -2.364300
H      -4.444400   -0.718200   -2.599200
H      -4.679100   -0.072800   -0.975100
C      -3.335000    3.131400   -3.158400
H      -4.217800    3.641400   -2.751400
H      -2.487000    3.823300   -3.133800
H      -3.548000    2.919100   -4.216500
100
LAO-8 Molecule Name
P      -0.767300    1.883700    0.339200
P      -0.238800   -1.772900    0.440900
O      -3.031000   -0.362100   -0.304200
C      -2.604100    1.895600    0.626000
C      -3.170700    3.055400    1.194600
H      -2.502400    3.831600    1.549400
C      -4.544500    3.242800    1.284700
H      -4.939300    4.149800    1.727300
C      -5.406400    2.275500    0.766600
H      -6.479300    2.426300    0.779100
C      -4.880300    1.109700    0.223600
H      -5.537000    0.375300   -0.219500
C      -3.498700    0.911900    0.203200
C      -3.101900   -1.461200    0.640700
C      -1.943300   -2.089900    1.117400
C      -2.131100   -3.087500    2.094200
H      -1.258000   -3.574800    2.511100
C      -3.394000   -3.471200    2.535600
H      -3.490500   -4.242200    3.291100
C      -4.524800   -2.875900    1.983100
H      -5.518700   -3.185200    2.284100
C      -4.374600   -1.869800    1.033700
H      -5.251000   -1.415100    0.599100
C      -0.242700    2.625800    1.948400
C      -0.470800    1.857400    3.104000
H      -0.991900    0.906600    3.021800
C      -0.042400    2.304200    4.351400
H      -0.229600    1.702100    5.234300
C       0.628600    3.525500    4.463300
H       0.968600    3.873500    5.432700
C       0.859900    4.293200    3.322900
H       1.379500    5.242000    3.402700
C       0.425300    3.849000    2.070800
H       0.613300    4.454200    1.191300
C      -0.613900    3.257600   -0.886000
C       0.693700    3.597800   -1.279000
H       1.535000    3.047300   -0.870100
C       0.905700    4.599100   -2.225500
H       1.920300    4.852200   -2.514100
C      -0.176600    5.253400   -2.816500
H      -0.008900    6.022700   -3.562800
C      -1.475600    4.897500   -2.457200
H      -2.324300    5.382200   -2.927700
C      -1.694800    3.908800   -1.496200
H      -2.714700    3.643800   -1.245900
C      -0.179900   -3.051000   -0.890300
C      -0.780300   -4.316100   -0.789200
H      -1.359600   -4.576600    0.090600
C      -0.658800   -5.243000   -1.823100
H      -1.132500   -6.214500   -1.733800
C       0.056900   -4.915100   -2.977100
H       0.143000   -5.634200   -3.784500
C       0.645900   -3.656000   -3.094000
H       1.183900   -3.384600   -3.995600
C       0.528100   -2.728900   -2.057200
H       0.956800   -1.738800   -2.163400
C       0.825700   -2.499300    1.772200
C       1.327100   -3.808500    1.763600
H       1.050200   -4.493000    0.969800
C       2.207100   -4.237400    2.760600
H       2.595700   -5.249900    2.733000
C       2.594100   -3.367100    3.779300
H       3.282600   -3.700300    4.548300
C       2.103500   -2.058800    3.795500
H       2.412900   -1.368400    4.572500
C       1.234400   -1.626600    2.796100
H       0.900700   -0.593300    2.785000
C       4.498800   -1.183800   -1.323500
C       3.360000   -1.334100   -0.278200
H       5.080100   -2.114800   -1.255900
H       3.786500   -1.419200    0.729800
H       2.822000   -2.268000   -0.470600
C       3.923300   -1.099100   -2.744900
H       4.720900   -0.969700   -3.482900
H       3.379600   -2.020500   -2.982100
H       3.221400   -0.264500   -2.845600
C       2.394500   -0.203100   -0.267600
N       2.304900    1.016600   -0.366100
Ni      0.529600    0.166100   -0.014600
C       5.443700   -0.046500   -0.964200
C       5.294400    1.246500   -1.479100
C       6.488800   -0.288400   -0.061600
C       6.167000    2.267900   -1.100400
H       4.483400    1.467000   -2.162300
C       7.361200    0.729600    0.320800
H       6.618800   -1.288700    0.344600
C       7.202600    2.014900   -0.200700
H       6.032200    3.264600   -1.507300
H       8.163800    0.519900    1.020300
H       7.879900    2.810200    0.091800
Al     -3.007300   -0.617600   -2.341700
Cl     -1.048100    0.250000   -2.912000
C      -3.193600   -2.573500   -2.529600
H      -4.075300   -2.792400   -3.147100
H      -2.318600   -3.007700   -3.026300
H      -3.318100   -3.098000   -1.575300
C      -4.439500    0.599800   -2.955100
H      -5.445200    0.271400   -2.661400
H      -4.297200    1.629300   -2.607000
H      -4.412500    0.625900   -4.053100
100
LAO-9 Molecule Name
P       2.010400    1.010500   -0.014500
P      -1.671700   -0.814300   -0.116700
O       1.230600   -1.963200   -1.066100
C       2.716400    0.011000   -1.399500
C       3.786700    0.563500   -2.127800
H       4.211300    1.501800   -1.793500
C       4.290000   -0.024500   -3.282100
H       5.113900    0.438600   -3.811500
C       3.707700   -1.194600   -3.753100
H       4.059900   -1.662900   -4.664400
C       2.671900   -1.787900   -3.037100
H       2.252300   -2.705000   -3.411700
C       2.195400   -1.210400   -1.862900
C       0.055300   -2.508000   -1.718700
C      -1.235800   -2.017700   -1.464300
C      -2.285900   -2.605000   -2.196400
H      -3.292100   -2.235500   -2.048700
C      -2.081300   -3.655800   -3.085200
H      -2.921500   -4.073000   -3.627300
C      -0.805800   -4.191000   -3.231400
H      -0.631400   -5.052000   -3.865500
C       0.255600   -3.619100   -2.539000
H       1.231700   -4.078100   -2.592200
C       2.551400    2.732900   -0.406800
C       2.251100    3.301900   -1.657200
H       1.760800    2.711100   -2.421200
C       2.543800    4.639500   -1.911800
H       2.300600    5.062100   -2.880100
C       3.124800    5.436000   -0.921900
H       3.340200    6.480400   -1.119300
C       3.420600    4.882700    0.323000
H       3.870400    5.492400    1.098900
C       3.142100    3.537900    0.579100
H       3.384100    3.123800    1.551100
C       3.059200    0.633900    1.441800
C       2.481500    0.628400    2.716100
H       1.407000    0.727700    2.815900
C       3.274600    0.452500    3.850200
H       2.812300    0.437400    4.830400
C       4.649600    0.264800    3.718900
H       5.263600    0.112600    4.599800
C       5.234300    0.260500    2.450300
H       6.302000    0.105800    2.341900
C       4.445600    0.454000    1.318300
H       4.912400    0.458400    0.339200
C      -1.867700   -1.935400    1.326500
C      -2.098700   -3.312000    1.208700
H      -2.146100   -3.778800    0.231100
C      -2.259300   -4.099600    2.349800
H      -2.414100   -5.167800    2.245600
C      -2.211500   -3.517700    3.615800
H      -2.329300   -4.132000    4.501500
C      -1.993500   -2.144700    3.741200
H      -1.936900   -1.689000    4.723300
C      -1.811500   -1.362500    2.604000
H      -1.584300   -0.306600    2.705100
C      -3.420700   -0.400500   -0.528000
C      -4.502300   -1.067200    0.068800
H      -4.328700   -1.819000    0.829600
C      -5.810700   -0.772900   -0.316600
H      -6.638200   -1.295400    0.151500
C      -6.052100    0.186500   -1.299800
H      -7.069700    0.412900   -1.600100
C      -4.981700    0.864300   -1.884700
H      -5.161100    1.627200   -2.633500
C      -3.672600    0.581300   -1.499400
H      -2.850800    1.120900   -1.954400
C      -0.431700    1.447200   -1.764200
N      -0.624200    1.916000   -2.830800
Ni     -0.128400    0.693700   -0.052200
H       0.175500    0.002200    1.207600
C      -0.503400    2.774200    1.826600
C      -1.276700    3.412500    0.925700
H      -0.891600    2.082200    2.564500
H       0.557400    2.990900    1.892300
C      -2.753900    3.213600    0.845200
C      -3.529200    3.991000   -0.030100
C      -3.424700    2.278500    1.652700
C      -4.917200    3.861400   -0.074600
H      -3.051600    4.706200   -0.688000
C      -4.808000    2.143400    1.606700
H      -2.863600    1.636600    2.321600
C      -5.564600    2.942000    0.747300
H      -5.490400    4.478900   -0.758100
H      -5.295000    1.401800    2.230300
H      -6.642600    2.831600    0.706500
C      -0.655400    4.419700   -0.013100
H      -0.792600    4.120900   -1.057900
H      -1.103000    5.411400    0.123700
H       0.416700    4.507600    0.170900
Al      2.091800   -3.242500    0.421300
Cl      1.472500   -2.485000    2.393100
C       1.200600   -4.983300    0.124000
H       1.402700   -5.595800    1.013400
H       0.112300   -4.898500    0.033800
H       1.577000   -5.531600   -0.748300
C       4.000600   -2.976700    0.006100
H       4.597000   -3.612100    0.674500
H       4.244600   -3.253800   -1.027400
H       4.325000   -1.943900    0.166400
100
LAO-TS11-12 Molecule Name
P      -2.005400    0.825100    0.042500
P       1.376400   -0.464700    0.565600
O      -1.187000   -2.223000   -0.298200
C      -3.098300   -0.667700   -0.098300
C      -4.497300   -0.517400   -0.067800
H      -4.915400    0.470600    0.077700
C      -5.357600   -1.595700   -0.244300
H      -6.429700   -1.438800   -0.217400
C      -4.835300   -2.868300   -0.471700
H      -5.491500   -3.714600   -0.636600
C      -3.457100   -3.055000   -0.491800
H      -3.032400   -4.030900   -0.693300
C      -2.615800   -1.962800   -0.289300
C      -0.632300   -2.496200    1.013300
C       0.414700   -1.725600    1.536300
C       0.789000   -2.008900    2.864400
H       1.583900   -1.426500    3.313100
C       0.176000   -3.008500    3.613200
H       0.491000   -3.185100    4.635100
C      -0.821900   -3.791400    3.035700
H      -1.285500   -4.598400    3.590300
C      -1.224500   -3.534400    1.729200
H      -1.992600   -4.138000    1.268600
C      -2.145900    1.193600    1.840900
C      -1.930800    2.503600    2.306700
H      -1.752900    3.308700    1.602500
C      -1.883900    2.763800    3.676700
H      -1.718100    3.779600    4.018900
C      -2.029400    1.725600    4.598400
H      -1.978100    1.929300    5.662400
C      -2.236600    0.422800    4.143800
H      -2.345500   -0.392000    4.851100
C      -2.303500    0.158700    2.775800
H      -2.468600   -0.860800    2.444200
C      -3.076700    2.081500   -0.779900
C      -4.030500    2.871500   -0.124700
H      -4.170600    2.777800    0.946500
C      -4.798300    3.791200   -0.841800
H      -5.525200    4.404600   -0.320600
C      -4.629500    3.925100   -2.220000
H      -5.225500    4.641800   -2.774200
C      -3.686700    3.137000   -2.883200
H      -3.547500    3.238000   -3.953900
C      -2.912300    2.227700   -2.165500
H      -2.165000    1.630700   -2.679700
C       2.805900   -1.507100    0.029400
C       3.061700   -2.799100    0.509200
H       2.388500   -3.268500    1.216000
C       4.180100   -3.509700    0.068500
H       4.355600   -4.513300    0.440000
C       5.062500   -2.936400   -0.847300
H       5.929200   -3.491500   -1.189400
C       4.819800   -1.647600   -1.325300
H       5.494300   -1.188200   -2.039400
C       3.697500   -0.943000   -0.895900
H       3.510700    0.048100   -1.287800
C       2.166800    0.508600    1.925700
C       3.502700    0.340600    2.318800
H       4.120800   -0.414000    1.847400
C       4.053800    1.155800    3.310200
H       5.091000    1.019400    3.597900
C       3.279000    2.140300    3.925100
H       3.711800    2.775000    4.690900
C       1.946400    2.308500    3.543900
H       1.332400    3.074200    4.004600
C       1.398200    1.503200    2.548400
H       0.376100    1.668900    2.237500
C       0.214700    2.725300   -0.497400
N       0.061400    3.760600    0.062700
Ni      0.086700    0.902300   -0.704700
C       0.655800    0.933900   -2.902700
C       1.074800    2.196300   -2.100600
H       0.046500    0.145800   -2.367700
H       0.035700    1.210600   -3.759500
H       1.534400    0.390300   -3.252000
C       2.578300    2.272700   -1.849300
C       3.137200    2.573900   -0.601400
C       3.451400    2.067000   -2.932000
C       4.521100    2.616300   -0.427700
H       2.490800    2.757400    0.245800
C       4.835000    2.112200   -2.761000
H       3.050100    1.863100   -3.920100
C       5.377100    2.376500   -1.501900
H       4.922100    2.822200    0.558500
H       5.486600    1.939900   -3.611200
H       6.452400    2.401600   -1.363000
C       0.610600    3.448300   -2.885000
H       0.925200    4.362400   -2.380100
H       1.060400    3.417000   -3.885900
H      -0.478000    3.463900   -2.984900
Al     -0.540200   -2.935500   -2.125500
C      -1.855600   -2.000700   -3.269900
H      -2.042200   -0.975000   -2.922900
H      -1.453800   -1.937400   -4.290200
H      -2.824100   -2.509900   -3.321300
C       1.363700   -2.772000   -2.570200
H       1.744300   -1.748000   -2.567500
H       2.019400   -3.379800   -1.941700
H       1.448200   -3.156800   -3.598400
Cl     -0.961800   -5.095800   -1.688800
93
LAO-TS1-2 Molecule Name
P       1.835500    0.104000    0.233500
P      -1.762000   -0.313400    0.191600
O      -0.263500    2.472600   -0.255000
C       2.113700    1.945500    0.165600
C       3.412000    2.460800    0.345300
H       4.225200    1.770000    0.529400
C       3.683500    3.823400    0.273900
H       4.698200    4.176800    0.415100
C       2.654600    4.726400    0.007100
H       2.855100    5.788000   -0.074200
C       1.359500    4.251900   -0.166200
H       0.549800    4.929400   -0.404100
C       1.109200    2.884100   -0.072400
C      -1.061600    2.378800    0.950500
C      -1.756100    1.204100    1.268400
C      -2.467200    1.215800    2.484500
H      -2.988300    0.315500    2.786700
C      -2.491500    2.324200    3.324300
H      -3.044000    2.283100    4.255600
C      -1.804600    3.480400    2.960400
H      -1.820300    4.357600    3.596300
C      -1.090400    3.507300    1.766700
H      -0.549500    4.398700    1.482900
C       1.871400   -0.174500    2.054500
C       2.123200   -1.470800    2.539800
H       2.358300   -2.273600    1.848100
C       2.020400   -1.741200    3.904100
H       2.218000   -2.745900    4.261200
C       1.643300   -0.737500    4.799100
H       1.552600   -0.955200    5.858000
C       1.382000    0.548500    4.323800
H       1.085200    1.334900    5.009300
C       1.505000    0.831300    2.962400
H       1.306200    1.839200    2.615700
C       3.474600   -0.473900   -0.371200
C       4.556900   -0.809500    0.451600
H       4.463600   -0.738400    1.529700
C       5.755700   -1.253000   -0.110500
H       6.583500   -1.523800    0.535900
C       5.885100   -1.357200   -1.495500
H       6.814500   -1.709600   -1.929500
C       4.811100   -1.018900   -2.321800
H       4.901200   -1.109400   -3.398600
C       3.610800   -0.585300   -1.763200
H       2.766900   -0.349900   -2.404900
C      -3.397000   -0.166900   -0.659300
C      -4.579400    0.191700    0.008000
H      -4.559200    0.421100    1.067300
C      -5.788300    0.263300   -0.679300
H      -6.692100    0.549400   -0.152500
C      -5.837200   -0.033000   -2.044500
H      -6.779400    0.024100   -2.578700
C      -4.672100   -0.398900   -2.715800
H      -4.699800   -0.625200   -3.775900
C      -3.458000   -0.462000   -2.027500
H      -2.552700   -0.712500   -2.565900
C      -2.106100   -1.648300    1.415400
C      -3.038500   -2.657300    1.131400
H      -3.661700   -2.591100    0.246300
C      -3.170800   -3.756300    1.982500
H      -3.893000   -4.530400    1.747100
C      -2.379300   -3.860300    3.126000
H      -2.480700   -4.717200    3.782800
C      -1.449600   -2.859700    3.415700
H      -0.820000   -2.931900    4.295500
C      -1.309200   -1.766200    2.565500
H      -0.575000   -1.004300    2.799900
C       0.951000   -2.641700   -0.512100
N       1.586000   -3.508900   -0.007300
Ni      0.184200   -1.018000   -0.750200
C       0.196500   -3.540600   -2.941000
C      -0.453700   -2.647000   -1.860500
H      -0.547100   -3.546400   -3.756800
H      -1.260000   -3.162800   -1.332300
H      -0.856900   -1.768700   -2.387200
C       0.397200   -5.000300   -2.515800
H       0.725300   -5.599200   -3.373700
H       1.148200   -5.077600   -1.725700
H      -0.539000   -5.429300   -2.138900
C       1.483700   -2.928100   -3.509300
H       1.816600   -3.485600   -4.392300
H       1.323700   -1.883000   -3.800200
H       2.281000   -2.958900   -2.760100
Al     -0.991200    2.690100   -2.153500
Cl     -0.167800    0.800100   -3.034500
C      -2.925500    2.910200   -1.844600
H      -3.168300    3.970200   -2.002500
H      -3.524800    2.322200   -2.548500
H      -3.258400    2.637000   -0.838400
C      -0.006100    4.171400   -3.011400
H      -0.266800    5.158300   -2.607800
H       1.081400    4.050700   -2.964100
H      -0.284300    4.173900   -4.074900
93
LAO-TS2-3 Molecule Name
P       1.899400    0.098900    0.064300
P      -1.436600   -0.953000   -0.145900
O      -0.722600    1.946800    0.989300
C       1.774800    1.765600    0.892500
C       2.990600    2.368000    1.278100
H       3.917400    1.859900    1.047800
C       3.051200    3.587900    1.942000
H       4.014100    4.008300    2.206700
C       1.872600    4.252600    2.263900
H       1.890800    5.205300    2.779300
C       0.654300    3.674100    1.927500
H      -0.265900    4.176100    2.181700
C       0.607800    2.455500    1.251100
C      -1.266200    1.018000    1.960800
C      -1.679400   -0.260700    1.572000
C      -2.308700   -1.028600    2.571200
H      -2.656900   -2.022500    2.320800
C      -2.473100   -0.567400    3.873300
H      -2.957900   -1.198600    4.608900
C      -2.020100    0.703300    4.223600
H      -2.145100    1.078500    5.232500
C      -1.424700    1.504800    3.255600
H      -1.092600    2.504900    3.502700
C       2.065700   -0.972500    1.567200
C       2.518700   -2.298700    1.448300
H       2.773200   -2.706300    0.479100
C       2.580900   -3.130100    2.566600
H       2.933600   -4.148200    2.445900
C       2.163700   -2.670100    3.815700
H       2.195600   -3.325900    4.679100
C       1.702300   -1.360000    3.944800
H       1.370700   -0.986700    4.907500
C       1.670200   -0.514800    2.835300
H       1.328700    0.502500    2.974200
C       3.591400    0.240700   -0.652800
C       4.688000   -0.540000   -0.273300
H       4.594900   -1.269900    0.520900
C       5.919600   -0.380700   -0.915000
H       6.758900   -1.000200   -0.619000
C       6.070700    0.566900   -1.925600
H       7.028000    0.687800   -2.420400
C       4.983300    1.362100   -2.298200
H       5.092600    2.105700   -3.080000
C       3.752400    1.194900   -1.671200
H       2.906900    1.810500   -1.964800
C      -3.102200   -0.673500   -0.880700
C      -4.269400   -1.321000   -0.445700
H      -4.217800   -2.062600    0.344300
C      -5.497600   -1.024600   -1.033100
H      -6.394700   -1.528400   -0.689800
C      -5.576000   -0.078700   -2.060300
H      -6.534400    0.149900   -2.513600
C      -4.422400    0.570500   -2.497200
H      -4.473100    1.316300   -3.282600
C      -3.192600    0.271800   -1.908600
H      -2.298200    0.798900   -2.219400
C      -1.434400   -2.764500    0.179200
C      -1.993300   -3.633100   -0.770100
H      -2.549200   -3.233700   -1.611600
C      -1.826400   -5.012300   -0.653400
H      -2.258500   -5.669200   -1.400400
C      -1.093900   -5.544700    0.407200
H      -0.955000   -6.616800    0.490400
C      -0.525100   -4.688200    1.349700
H       0.064100   -5.087000    2.168300
C      -0.688700   -3.310100    1.234500
H      -0.218700   -2.661000    1.965000
H       0.430400    0.790900   -2.046700
C       1.281900   -2.383000   -1.450100
N       1.793700   -3.443000   -1.532100
Ni      0.529300   -0.626800   -1.527600
C       0.462300    0.020200   -3.627000
C      -0.272200   -1.151600   -3.330100
H       0.146300   -2.123900   -3.555900
H      -1.357500   -1.097900   -3.295900
C      -0.233700    1.234900   -4.221500
H       0.309700    2.159600   -4.014100
H      -0.273600    1.094700   -5.310100
H      -1.252500    1.358100   -3.855800
C       1.893300   -0.142500   -4.112400
H       2.470900    0.771400   -3.961900
H       2.406300   -0.967200   -3.613400
H       1.871800   -0.343700   -5.192500
Al     -2.196700    3.239100    0.204700
Cl     -1.362800    3.389900   -1.834700
C      -3.895400    2.313400    0.580500
H      -3.844400    1.235000    0.739100
H      -4.322100    2.768400    1.485200
H      -4.602100    2.482200   -0.242000
C      -2.126400    5.033400    1.047700
H      -2.996700    5.569700    0.640500
H      -2.255000    5.022600    2.139300
H      -1.239700    5.623300    0.793500
100
LAO-TS5-6 Molecule Name
P       2.130000    0.646200    0.004300
P      -1.404600   -0.433000   -0.839500
O       0.871300   -2.152100    0.839000
C       2.911400   -0.740100    0.960400
C       4.257800   -0.661100    1.365100
H       4.788200    0.272900    1.228400
C       4.928500   -1.740900    1.927700
H       5.964100   -1.634300    2.228800
C       4.268500   -2.958000    2.084600
H       4.775700   -3.815400    2.510300
C       2.938700   -3.068700    1.694500
H       2.412300   -4.002100    1.831700
C       2.273600   -1.966500    1.158100
C       0.540800   -2.607100   -0.498300
C      -0.479500   -2.006100   -1.262500
C      -0.774700   -2.640600   -2.486700
H      -1.563800   -2.234000   -3.104800
C      -0.074800   -3.749000   -2.954000
H      -0.339900   -4.188000   -3.908600
C       0.961400   -4.278300   -2.192900
H       1.530100   -5.131900   -2.541400
C       1.253700   -3.711300   -0.957400
H       2.044800   -4.131000   -0.353000
C       3.023100    0.288900   -1.581100
C       2.333800   -0.396400   -2.587900
H       1.284000   -0.618200   -2.457800
C       2.977600   -0.780300   -3.763200
H       2.422300   -1.309500   -4.529800
C       4.322800   -0.468000   -3.954600
H       4.824800   -0.754600   -4.872300
C       5.019400    0.226200   -2.963000
H       6.063800    0.480200   -3.108800
C       4.376600    0.596800   -1.782700
H       4.930200    1.141000   -1.025400
C       3.012500    2.124500    0.648800
C       3.241400    3.204600   -0.221800
H       2.994900    3.113400   -1.274800
C       3.753900    4.406500    0.266900
H       3.923900    5.230000   -0.417800
C       4.035500    4.553000    1.626700
H       4.432000    5.489300    2.003800
C       3.795700    3.491600    2.500400
H       3.999100    3.600600    3.560200
C       3.283500    2.286700    2.016700
H       3.085600    1.475600    2.710900
C      -2.828200   -1.091700    0.124400
C      -3.659700   -2.088700   -0.417700
H      -3.425700   -2.528100   -1.381800
C      -4.795300   -2.509700    0.266000
H      -5.429600   -3.277400   -0.163400
C      -5.113500   -1.948400    1.507800
H      -6.000100   -2.276800    2.039400
C      -4.286500   -0.973200    2.059400
H      -4.515900   -0.532200    3.022200
C      -3.150200   -0.546200    1.367500
H      -2.514200    0.207300    1.805600
C      -2.258300    0.010800   -2.424900
C      -3.626600    0.326600   -2.426800
H      -4.215900    0.204000   -1.526800
C      -4.243900    0.815200   -3.579700
H      -5.301800    1.054500   -3.557200
C      -3.508000    0.993000   -4.750000
H      -3.986800    1.376300   -5.644400
C      -2.145500    0.690300   -4.758400
H      -1.554500    0.851600   -5.652400
C      -1.525300    0.213800   -3.606400
H      -0.457600    0.036500   -3.626900
H      -0.571600    0.988900    1.172500
C       0.273700    2.064100   -1.916200
N       0.599800    2.566600   -2.932300
Ni     -0.157200    1.353900   -0.216000
C      -0.922300    2.712000    1.405400
C      -0.259600    3.343800    0.338900
H       0.765300    3.676000    0.470800
H      -0.817700    3.851900   -0.436900
C      -0.228100    2.679500    2.757800
H      -0.546800    1.838100    3.374600
H       0.850500    2.606700    2.618100
H      -0.439100    3.615300    3.290200
C      -2.426900    2.687100    1.398800
C      -3.148500    2.707900    2.599600
C      -3.144200    2.646500    0.191200
C      -4.545300    2.684800    2.595300
H      -2.626600    2.730000    3.548500
C      -4.535500    2.627900    0.187700
H      -2.609500    2.592100   -0.752200
C      -5.244700    2.643200    1.391100
H      -5.082600    2.697400    3.537800
H      -5.063800    2.589200   -0.759100
H      -6.328900    2.617500    1.387800
Al     -0.261400   -2.793800    2.511000
C      -1.728800   -3.805800    1.676900
H      -1.648800   -4.838600    2.043600
H      -2.711200   -3.421900    1.970500
H      -1.704200   -3.836800    0.583800
C       0.816100   -3.862200    3.785400
H       1.099800   -4.853500    3.407400
H       1.710200   -3.353400    4.158900
H       0.155100   -4.030400    4.649200
Cl     -0.501600   -0.803900    3.458000
100
LAO-TS7-8 Molecule Name
P       0.388900    1.801900    0.364600
P      -1.189800   -1.637700    0.194700
O      -2.599300    1.182700   -0.523500
C      -1.016300    2.983400    0.047600
C      -0.818100    4.369300    0.204500
H       0.166300    4.725200    0.483300
C      -1.838800    5.288600   -0.006500
H      -1.646300    6.347100    0.122900
C      -3.103800    4.846300   -0.399200
H      -3.900900    5.554100   -0.592600
C      -3.332800    3.485500   -0.558000
H      -4.291500    3.123500   -0.907600
C      -2.298900    2.581100   -0.314900
C      -3.147200    0.461600    0.611900
C      -2.620300   -0.774900    1.021600
C      -3.216700   -1.357200    2.158100
H      -2.823500   -2.299600    2.519900
C      -4.271700   -0.759600    2.840700
H      -4.692200   -1.243300    3.714500
C      -4.778400    0.456400    2.391600
H      -5.603900    0.937200    2.902700
C      -4.214400    1.064000    1.274300
H      -4.601100    2.013700    0.936800
C       0.502200    2.055500    2.189000
C      -0.200900    1.153200    2.998900
H      -0.727700    0.322400    2.545500
C      -0.231700    1.309500    4.383800
H      -0.778500    0.597000    4.991800
C       0.446300    2.372900    4.980100
H       0.432000    2.493700    6.057800
C       1.147000    3.280000    4.183400
H       1.678000    4.107800    4.640900
C       1.171300    3.127000    2.797300
H       1.725400    3.837600    2.194400
C       1.785100    2.754000   -0.361900
C       3.062400    2.719200    0.221500
H       3.218300    2.201200    1.160300
C       4.151200    3.293400   -0.436400
H       5.131500    3.254800    0.025900
C       3.985700    3.891500   -1.686200
H       4.836100    4.328800   -2.197900
C       2.723500    3.909600   -2.282600
H       2.589300    4.354700   -3.262300
C       1.630800    3.343500   -1.627500
H       0.661200    3.342800   -2.114600
C      -2.089600   -2.772700   -0.953200
C      -3.366300   -3.295100   -0.691100
H      -3.903200   -2.993800    0.202100
C      -3.963900   -4.190000   -1.577000
H      -4.952800   -4.580500   -1.363100
C      -3.296400   -4.573400   -2.742300
H      -3.764300   -5.264700   -3.434600
C      -2.029000   -4.058800   -3.015400
H      -1.507300   -4.344400   -3.922000
C      -1.430200   -3.165200   -2.126300
H      -0.454200   -2.757800   -2.357700
C      -0.642800   -2.815800    1.516400
C      -1.113900   -4.135000    1.625700
H      -1.842700   -4.514800    0.919600
C      -0.640500   -4.977100    2.633000
H      -1.012200   -5.994100    2.699300
C       0.311100   -4.517200    3.544400
H       0.683000   -5.175800    4.322000
C       0.796600   -3.213600    3.437000
H       1.556900   -2.851600    4.119600
C       0.328800   -2.370700    2.429400
H       0.756700   -1.380500    2.335500
C       2.198200   -0.482800    0.437800
N       3.036500   -0.404700    1.274300
Ni      0.585800   -0.296200   -0.369300
C       3.264600   -1.302600   -1.932100
C       1.982700   -1.626500   -1.125200
H       3.215100   -1.992400   -2.792400
H       2.048700   -2.578200   -0.593900
H       1.157900   -1.676400   -1.852300
C       3.227900    0.118900   -2.502300
H       4.086000    0.299900   -3.158200
H       2.309900    0.272900   -3.077700
H       3.240100    0.863500   -1.702900
C       4.553900   -1.654700   -1.203100
C       5.463100   -0.690900   -0.756400
C       4.855500   -3.005700   -0.981200
C       6.637400   -1.066800   -0.102700
H       5.247500    0.361700   -0.897600
C       6.023700   -3.386300   -0.323900
H       4.162800   -3.768100   -1.329900
C       6.922800   -2.413700    0.117700
H       7.326100   -0.303200    0.243900
H       6.233900   -4.438300   -0.159900
H       7.834800   -2.703600    0.629000
Al     -2.712800    0.727400   -2.520900
Cl     -0.555800    0.213600   -2.866300
C      -4.106400   -0.659800   -2.585700
H      -4.946500   -0.267700   -3.174900
H      -3.761600   -1.581900   -3.065200
H      -4.489500   -0.931600   -1.595900
C      -2.999800    2.427700   -3.484200
H      -4.004400    2.845400   -3.342800
H      -2.267300    3.198900   -3.221700
H      -2.880000    2.219900   -4.557000
100
LAO-TS9-10 Molecule Name
P      -1.739800    1.240600    0.020600
P       1.476900   -0.926200    0.077700
O      -1.504200   -1.781500    1.102800
C      -2.593300    0.428800    1.447300
C      -3.547900    1.164400    2.177700
H      -3.777000    2.173900    1.863900
C      -4.191700    0.652400    3.297800
H      -4.914000    1.259800    3.830000
C      -3.897500   -0.638200    3.721800
H      -4.382900   -1.063100    4.592200
C      -2.987100   -1.404100    3.002600
H      -2.806300   -2.416900    3.317800
C      -2.346700   -0.880800    1.881600
C      -0.372200   -2.383300    1.784600
C       0.950100   -2.007500    1.503000
C       1.947600   -2.634000    2.277500
H       2.981400   -2.367800    2.112800
C       1.661100   -3.602100    3.234500
H       2.468000   -4.046900    3.804600
C       0.348100   -4.020500    3.415600
H       0.104400   -4.816000    4.109400
C      -0.662300   -3.412600    2.680300
H      -1.671200   -3.784900    2.766600
C      -2.125900    3.028500    0.302600
C      -1.742600    3.647200    1.507200
H      -1.292400    3.060900    2.300300
C      -1.899400    5.020000    1.678000
H      -1.596400    5.478100    2.612900
C      -2.421000    5.805000    0.646000
H      -2.532400    6.875600    0.778200
C      -2.795900    5.203700   -0.554200
H      -3.202600    5.803200   -1.361500
C      -2.656800    3.823300   -0.724200
H      -2.964100    3.372000   -1.660700
C      -2.858700    0.878200   -1.395100
C      -2.316100    0.726400   -2.675900
H      -1.240800    0.697900   -2.805000
C      -3.146500    0.558600   -3.784100
H      -2.709100    0.426200   -4.767000
C      -4.529700    0.522100   -3.620400
H      -5.175400    0.374600   -4.479100
C      -5.083000    0.660800   -2.345300
H      -6.158200    0.622300   -2.210100
C      -4.253800    0.847300   -1.241600
H      -4.695200    0.968900   -0.258200
C       1.374800   -2.125000   -1.315000
C       1.369500   -3.515100   -1.133700
H       1.383000   -3.935300   -0.134300
C       1.344600   -4.371500   -2.234300
H       1.316200   -5.444100   -2.077800
C       1.347500   -3.851100   -3.528100
H       1.321400   -4.518500   -4.382300
C       1.369200   -2.469400   -3.719300
H       1.359800   -2.057400   -4.722300
C       1.373200   -1.614400   -2.619800
H       1.354300   -0.541100   -2.774600
C       3.301700   -0.871500    0.374900
C       4.205300   -1.696600   -0.309500
H       3.852600   -2.382200   -1.070700
C       5.569000   -1.650800   -0.011200
H       6.256300   -2.293700   -0.550900
C       6.042400   -0.790200    0.977900
H       7.101500   -0.757600    1.210700
C       5.149200    0.039800    1.658300
H       5.509500    0.728600    2.413700
C       3.790500    0.010200    1.354300
H       3.109600    0.669000    1.880800
C       0.830400    1.594600    1.689200
N       0.994700    1.889900    2.820100
Ni      0.546600    1.125700   -0.108200
H       0.345500    0.837600   -1.546100
C       0.953400    2.345700   -1.890900
C       1.680800    2.902800   -0.827500
H       1.467800    1.872800   -2.722300
H       0.009900    2.812900   -2.161400
C       3.149500    2.658800   -0.710000
C       3.921000    3.417900    0.184800
C       3.820300    1.726700   -1.522100
C       5.307900    3.281700    0.235400
H       3.438900    4.122300    0.850500
C       5.203600    1.592700   -1.475400
H       3.259600    1.075800   -2.184200
C       5.958100    2.378700   -0.603000
H       5.878500    3.885400    0.933400
H       5.691000    0.857100   -2.105400
H       7.036400    2.269800   -0.563300
C       1.137900    4.152600   -0.157900
H       1.221400    4.116800    0.929600
H       1.696200    5.026200   -0.520400
H       0.086500    4.299300   -0.405600
Al     -2.593200   -3.048800   -0.226400
Cl     -1.982900   -2.484100   -2.262700
C      -1.921000   -4.865300    0.171100
H      -2.229600   -5.506600   -0.666000
H      -0.829300   -4.921500    0.232700
H      -2.339800   -5.297900    1.088300
C      -4.445700   -2.528100    0.207200
H      -5.114700   -2.989000   -0.531900
H      -4.756300   -2.871200    1.202000
H      -4.605700   -1.446500    0.155700
110
2LA-10 Molecule Name
P       1.173300   -1.497100   -0.947400
P      -0.238700    1.984100    0.035400
O       1.884200    0.157500    1.657200
C       1.746400   -2.114000    0.704600
C       1.998400   -3.486800    0.894100
H       1.772500   -4.177900    0.093700
C       2.534800   -3.987100    2.076400
H       2.698600   -5.052500    2.182400
C       2.882900   -3.112700    3.101400
H       3.339300   -3.478500    4.012800
C       2.658400   -1.751000    2.939900
H       3.002700   -1.059400    3.695500
C       2.058200   -1.271500    1.776700
C       0.852400    0.812300    2.444400
C       0.057100    1.809000    1.857100
C      -0.707300    2.599600    2.738200
H      -1.305500    3.403600    2.330700
C      -0.762800    2.355300    4.105500
H      -1.371400    2.985300    4.742800
C      -0.062200    1.275900    4.631300
H      -0.129700    1.028000    5.683700
C       0.759100    0.518400    3.801800
H       1.312400   -0.298500    4.232200
C       0.631300   -3.072900   -1.734900
C      -0.408900   -3.802200   -1.131300
H      -0.831700   -3.492100   -0.181400
C      -0.927300   -4.938300   -1.745300
H      -1.727700   -5.479400   -1.253100
C      -0.426800   -5.354200   -2.982300
H      -0.836800   -6.233500   -3.467100
C       0.604500   -4.637300   -3.589400
H       1.003400   -4.960200   -4.545100
C       1.139100   -3.504800   -2.967400
H       1.950000   -2.964800   -3.444200
C       2.758700   -1.131600   -1.797500
C       2.742400   -0.188000   -2.832500
H       1.821400    0.334100   -3.068200
C       3.904400    0.112100   -3.540400
H       3.879800    0.856100   -4.328500
C       5.102700   -0.517700   -3.207000
H       6.013700   -0.269100   -3.739700
C       5.131900   -1.456800   -2.174900
H       6.063700   -1.942300   -1.907300
C       3.965600   -1.770300   -1.479200
H       3.999200   -2.506300   -0.683400
C       0.882600    3.315500   -0.530900
C       1.343500    4.327900    0.320500
H       1.076000    4.317800    1.371400
C       2.156200    5.346100   -0.174100
H       2.524900    6.113300    0.497400
C       2.499600    5.373600   -1.526600
H       3.138700    6.162400   -1.907800
C       2.031200    4.378700   -2.384700
H       2.304700    4.390500   -3.433900
C       1.232600    3.351300   -1.886300
H       0.899600    2.561100   -2.551000
C      -1.868100    2.864200    0.042200
C      -2.045800    4.119200   -0.553600
H      -1.211100    4.623900   -1.026400
C      -3.296200    4.745500   -0.524800
H      -3.417500    5.717300   -0.991200
C      -4.371800    4.135700    0.115200
H      -5.338000    4.627000    0.148000
C      -4.204900    2.880100    0.706300
H      -5.041300    2.385800    1.185700
C      -2.972700    2.239900    0.651800
H      -2.867300    1.258400    1.100500
C      -1.299000    0.529100   -3.105600
C      -2.251600   -0.321100   -2.344000
H      -1.591200    1.570800   -3.228600
C      -1.533000   -0.878200    0.318200
N      -1.944500   -1.429600    1.269400
Ni     -0.711500   -0.049200   -1.085000
H      -0.976900    0.084800   -4.050400
C      -3.584600    0.241200   -1.942000
C      -4.403600   -0.485600   -1.057800
C      -4.112300    1.408100   -2.514700
C      -5.694400   -0.060500   -0.759300
H      -4.026000   -1.387700   -0.590500
C      -5.408900    1.831300   -2.220500
H      -3.528400    1.991800   -3.216700
C      -6.207800    1.098800   -1.345500
H      -6.300300   -0.641600   -0.072500
H      -5.791000    2.736600   -2.679800
H      -7.217900    1.424900   -1.121900
C      -2.341200   -1.764900   -2.825500
H      -2.679000   -2.438800   -2.036700
H      -3.067500   -1.826800   -3.648000
H      -1.377600   -2.132200   -3.184800
C      -4.232900   -1.684700    3.365700
H      -4.883900   -1.428400    2.519400
H      -4.812800   -2.315000    4.050900
H      -3.984300   -0.753200    3.893100
C      -0.994600   -2.875500    3.852500
H      -0.139600   -3.180500    3.234600
H      -0.722100   -1.949700    4.377900
H      -1.157100   -3.656700    4.605400
Cl     -3.057400   -4.393100    1.452400
Al     -2.592700   -2.582900    2.717700
H      -0.254600    0.621800   -2.556800
Al      3.778900    1.202500    1.596100
Cl      3.983600    1.984700   -0.447000
C       3.425400    2.562100    2.981600
H       3.339600    2.111700    3.979200
H       4.263800    3.270600    3.006300
H       2.513600    3.140100    2.799600
C       5.130800   -0.218500    1.838100
H       6.092100    0.199000    1.508600
H       5.249000   -0.551200    2.875900
H       4.935000   -1.099400    1.217000
110
2LA-11 Molecule Name
P      -0.052700   -1.920400    0.147800
P       1.217700    1.352000    0.489800
O       3.020500   -1.227800   -0.491600
C       1.437700   -3.024700    0.093800
C       1.253600   -4.398400    0.347300
H       0.255800   -4.763500    0.553200
C       2.309800   -5.301000    0.330900
H       2.124700   -6.349900    0.529000
C       3.597700   -4.852000    0.043700
H       4.430100   -5.544400    0.006700
C       3.812300   -3.502900   -0.213600
H       4.799300   -3.158600   -0.481600
C       2.741600   -2.608800   -0.173300
C       3.563600   -0.401900    0.562700
C       2.844300    0.674200    1.093500
C       3.490500    1.405700    2.113900
H       2.981800    2.265300    2.533800
C       4.761900    1.086700    2.573100
H       5.214700    1.678100    3.359800
C       5.459600    0.030600    1.989300
H       6.468700   -0.207600    2.303200
C       4.859600   -0.706600    0.976300
H       5.407700   -1.501200    0.492900
C      -0.480500   -2.027400    1.936800
C      -1.767200   -1.636200    2.346600
H      -2.483600   -1.264000    1.624600
C      -2.141600   -1.738700    3.683800
H      -3.141500   -1.440200    3.977700
C      -1.236000   -2.213700    4.634600
H      -1.532100   -2.297100    5.674500
C       0.053000   -2.570900    4.242800
H       0.767100   -2.929700    4.976200
C       0.430400   -2.479600    2.901700
H       1.434000   -2.773000    2.615600
C      -1.290900   -3.038200   -0.646700
C      -2.090600   -3.935500    0.074300
H      -2.019600   -3.987500    1.154900
C      -3.008100   -4.751300   -0.588500
H      -3.637600   -5.422600   -0.015900
C      -3.138400   -4.680200   -1.974700
H      -3.863700   -5.303300   -2.485400
C      -2.349000   -3.786300   -2.700000
H      -2.459000   -3.709100   -3.775500
C      -1.434900   -2.967800   -2.040600
H      -0.852400   -2.255700   -2.613200
C       1.712400    3.141500    0.449500
C       1.097600    4.115900    1.247900
H       0.300700    3.850500    1.929700
C       1.490800    5.452900    1.159700
H       0.998000    6.193100    1.780600
C       2.497500    5.836000    0.275000
H       2.791900    6.877100    0.200100
C       3.127700    4.868900   -0.511000
H       3.918500    5.149700   -1.197400
C       2.744300    3.532400   -0.419500
H       3.252800    2.794200   -1.028500
C       0.129700    1.335600    1.980000
C      -1.165900    1.858200    1.804600
H      -1.502100    2.181500    0.824400
C      -2.024700    1.996900    2.893800
H      -3.016300    2.404100    2.739300
C      -1.610300    1.601900    4.165800
H      -2.280600    1.707400    5.011900
C      -0.340400    1.052800    4.342000
H      -0.023200    0.715800    5.322400
C       0.525500    0.917500    3.257000
H       1.500800    0.473400    3.413700
C       0.614100    2.058300   -2.865400
C      -0.757800    1.660900   -2.309000
H       1.275300    2.526200   -2.140700
C      -2.104300   -0.123500   -0.817500
N      -3.234300   -0.316100   -0.567100
Ni     -0.296100    0.258900   -0.912000
H       1.137300    1.194000   -3.280300
H       0.471100    2.775800   -3.688000
C      -1.543900    2.815100   -1.728100
C      -2.943400    2.747200   -1.568600
C      -0.914600    4.010100   -1.335900
C      -3.662300    3.784700   -0.981000
H      -3.499700    1.879900   -1.895700
C      -1.633800    5.053900   -0.750200
H       0.148700    4.142900   -1.484500
C      -3.008700    4.942600   -0.552700
H      -4.736200    3.677200   -0.871100
H      -1.108400    5.955500   -0.452700
H      -3.566300    5.751700   -0.093400
C      -1.504300    0.910600   -3.429200
H      -2.514300    0.597600   -3.166300
H      -1.577500    1.570700   -4.306000
H      -0.945000    0.019600   -3.736600
Al     -5.130000   -0.405100   -0.041900
Cl     -6.068500    0.619800   -1.796900
C      -5.570400   -2.331000    0.066900
H      -5.314200   -2.839600   -0.870300
H      -5.009100   -2.818500    0.876500
H      -6.639800   -2.489700    0.255400
C      -5.157600    0.747000    1.573200
H      -4.480800    0.358200    2.347900
H      -4.822600    1.758700    1.308000
H      -6.160900    0.828500    2.009400
Al      3.481500   -1.017800   -2.491200
C       5.082900   -2.118700   -2.843400
H       4.878800   -3.194000   -2.898500
H       5.484200   -1.808700   -3.817900
H       5.885700   -1.945700   -2.114300
C       1.708700   -1.448000   -3.223700
H       1.592100   -1.105300   -4.258800
H       1.529500   -2.530500   -3.201400
H       0.923800   -0.962500   -2.627400
Cl      4.135400    1.092800   -2.523300
110
2LA-12 Molecule Name
P      -1.327800    1.509800    0.413900
P       0.143600   -1.667900    0.499700
O      -2.906700   -1.138900   -0.499800
C      -3.140100    1.084700    0.522000
C      -4.029200    2.066700    1.007600
H      -3.627400    2.992000    1.398800
C      -5.407600    1.898100    0.977300
H      -6.053200    2.679800    1.359700
C      -5.953800    0.741200    0.419800
H      -7.027200    0.615500    0.345500
C      -5.108300   -0.247200   -0.066100
H      -5.510400   -1.123700   -0.557800
C      -3.727400   -0.073400    0.021800
C      -2.702300   -2.228800    0.430100
C      -1.456100   -2.446400    1.019200
C      -1.379800   -3.486700    1.969500
H      -0.422700   -3.697600    2.432600
C      -2.479900   -4.263000    2.305400
H      -2.381600   -5.049000    3.044600
C      -3.697200   -4.047200    1.658300
H      -4.555800   -4.671600    1.873500
C      -3.807100   -3.031800    0.716900
H      -4.733600   -2.887100    0.184200
C      -0.943700    2.005200    2.143600
C       0.321200    2.574400    2.358900
H       1.001900    2.713300    1.528300
C       0.721100    2.953900    3.637100
H       1.703900    3.388100    3.778800
C      -0.134600    2.760000    4.723400
H       0.175500    3.054900    5.720000
C      -1.383300    2.172200    4.524400
H      -2.048200    2.005900    5.365300
C      -1.786700    1.791500    3.242700
H      -2.756300    1.326100    3.110700
C      -1.527300    3.088000   -0.507400
C      -1.839400    4.312600    0.097100
H      -1.844600    4.399500    1.179400
C      -2.110000    5.432800   -0.686800
H      -2.336400    6.380400   -0.211000
C      -2.069100    5.340600   -2.079300
H      -2.278600    6.214000   -2.686600
C      -1.731900    4.131100   -2.688000
H      -1.672500    4.059900   -3.767900
C      -1.451600    3.011500   -1.905200
H      -1.164300    2.078600   -2.381000
C       0.978600   -3.272900    0.099300
C       1.998900   -3.833700    0.876600
H       2.385300   -3.306300    1.740000
C       2.541100   -5.076000    0.538300
H       3.331500   -5.496900    1.150500
C       2.075600   -5.768800   -0.578200
H       2.503300   -6.729900   -0.841100
C       1.046900   -5.223300   -1.350700
H       0.667400   -5.758300   -2.213900
C       0.498200   -3.989700   -1.009000
H      -0.313400   -3.585600   -1.604500
C       0.933800   -1.155900    2.081200
C       2.289900   -0.786500    2.023300
H       2.836200   -0.850400    1.087700
C       2.948500   -0.329800    3.162600
H       3.993600   -0.051300    3.091500
C       2.258100   -0.214100    4.369700
H       2.765700    0.153800    5.254500
C       0.907200   -0.555200    4.430400
H       0.359400   -0.443800    5.359100
C       0.245800   -1.023200    3.294300
H      -0.807900   -1.269200    3.358100
C       2.274700   -1.682800   -3.020600
C       2.953900   -0.484700   -2.343300
H       1.733200   -2.307100   -2.311300
C       1.924200    0.325200   -1.573100
N       1.713300    1.503000   -1.239400
Ni      0.346300    0.276100   -0.526700
H       1.562200   -1.329100   -3.769700
H       3.027500   -2.294500   -3.528100
C       4.011500   -0.912000   -1.306100
C       4.788500    0.071000   -0.673400
C       4.207500   -2.249800   -0.948300
C       5.713100   -0.271900    0.310100
H       4.673600    1.113900   -0.945400
C       5.141700   -2.595700    0.031700
H       3.626500   -3.035800   -1.413900
C       5.890900   -1.610200    0.671200
H       6.292800    0.508600    0.790700
H       5.271900   -3.639900    0.295100
H       6.611300   -1.879800    1.435900
C       3.595200    0.379100   -3.453800
H       4.108300    1.257600   -3.064900
H       4.312600   -0.237500   -4.004800
H       2.824800    0.726800   -4.149600
Al      2.588800    3.248000   -0.721700
Cl      4.120800    3.635500   -2.322700
C       1.395100    4.813000   -0.668700
H       0.715000    4.874300   -1.523800
H       0.798400    4.865500    0.248600
H       2.039900    5.702500   -0.698000
C       3.513900    2.757800    0.980500
H       3.205600    1.782900    1.375500
H       4.601500    2.735400    0.836500
H       3.305400    3.519100    1.746300
Al     -3.002400   -1.262800   -2.559200
C      -3.889900    0.432200   -3.042600
H      -3.500500    1.306200   -2.507000
H      -3.730300    0.610900   -4.115100
H      -4.971800    0.394200   -2.874500
C      -1.197800   -1.643500   -3.228300
H      -1.022000   -2.699900   -3.457400
H      -1.057900   -1.078700   -4.160700
H      -0.427000   -1.303400   -2.527300
Cl     -4.403900   -2.996800   -2.647800
103
2LA-1 Molecule Name
P      -1.232700   -1.364600   -0.066600
P       1.608000    0.402400    0.936900
O       1.635300   -1.605200   -1.581100
C      -0.510200   -2.735800   -1.095300
C      -1.302100   -3.882800   -1.304800
H      -2.320200   -3.886200   -0.938500
C      -0.823100   -5.010200   -1.960900
H      -1.469600   -5.868800   -2.097700
C       0.483700   -5.023100   -2.443300
H       0.875200   -5.888100   -2.965000
C       1.283500   -3.898300   -2.279400
H       2.272500   -3.883200   -2.708200
C       0.786900   -2.776700   -1.614600
C       2.805400   -1.622400   -0.738900
C       2.860900   -0.860400    0.432100
C       4.051000   -0.936400    1.182500
H       4.135500   -0.335100    2.081100
C       5.126100   -1.720900    0.783700
H       6.025800   -1.753100    1.386600
C       5.056700   -2.421500   -0.420200
H       5.906200   -2.992000   -0.775800
C       3.898900   -2.361800   -1.187300
H       3.865900   -2.846000   -2.152400
C      -1.285800   -2.196600    1.577700
C      -2.003500   -1.539000    2.590900
H      -2.474400   -0.582800    2.383900
C      -2.134000   -2.116500    3.850500
H      -2.697400   -1.600200    4.619400
C      -1.535800   -3.349100    4.123800
H      -1.640600   -3.798400    5.105300
C      -0.797900   -3.994100    3.133700
H      -0.322700   -4.947100    3.340300
C      -0.672100   -3.422000    1.865400
H      -0.103600   -3.945400    1.105700
C      -2.997600   -1.420800   -0.581100
C      -3.933600   -2.295100   -0.002300
H      -3.635600   -2.961100    0.800700
C      -5.259600   -2.290600   -0.431100
H      -5.975900   -2.960800    0.031400
C      -5.667100   -1.412800   -1.437800
H      -6.702500   -1.397600   -1.759300
C      -4.748000   -0.532900   -2.007700
H      -5.063300    0.191600   -2.747500
C      -3.420200   -0.531800   -1.578400
H      -2.732400    0.197200   -1.991500
C       2.749300    1.841300    1.169400
C       2.938400    2.498700    2.393100
H       2.445600    2.147500    3.291000
C       3.769900    3.619200    2.469800
H       3.902600    4.120000    3.422700
C       4.428000    4.088600    1.333700
H       5.070600    4.959900    1.396600
C       4.257700    3.427400    0.115500
H       4.766300    3.777300   -0.776000
C       3.423300    2.314700    0.033500
H       3.295800    1.817300   -0.921900
C       1.166800   -0.017900    2.675700
C       0.306800    0.882100    3.333000
H      -0.081200    1.745800    2.800900
C      -0.048900    0.680800    4.664100
H      -0.702000    1.391200    5.158700
C       0.421900   -0.440200    5.350100
H       0.140700   -0.603500    6.384500
C       1.236200   -1.361100    4.693400
H       1.578100   -2.250800    5.210100
C       1.610900   -1.151700    3.364700
H       2.240300   -1.882300    2.870300
C       0.200100    4.509900   -1.459000
C       0.081800    3.900100   -0.030900
H       0.634000    5.508100   -1.303200
H      -0.535300    4.564200    0.587600
H       1.077700    3.833200    0.414300
C      -1.166900    4.677000   -2.132000
H      -1.054400    5.197300   -3.089300
H      -1.638000    3.709000   -2.332900
H      -1.859300    5.254200   -1.511800
C       1.158500    3.706500   -2.346200
H       1.240300    4.167100   -3.336500
H       2.160200    3.655600   -1.912500
H       0.803100    2.680300   -2.487000
C      -0.559000    2.557500   -0.031200
N      -1.704500    2.078000   -0.085000
Ni     -0.338800    0.694000    0.007900
Al     -3.570900    2.668800    0.285700
Cl     -4.463300    2.918700   -1.757600
C      -4.460500    1.285900    1.390100
H      -3.951400    1.192700    2.361500
H      -5.496000    1.587800    1.597700
H      -4.495000    0.299000    0.918300
C      -3.303700    4.428500    1.178000
H      -2.930600    5.204300    0.498800
H      -4.258900    4.786900    1.585300
H      -2.601100    4.343900    2.021000
Al      1.569400   -0.609400   -3.401400
Cl      3.299100    0.752100   -3.129300
C       2.086400   -1.976000   -4.732500
H       1.325200   -2.751400   -4.876800
H       2.226700   -1.467200   -5.696000
H       3.042700   -2.461300   -4.497700
C      -0.225400    0.183700   -3.365100
H      -0.992500   -0.592700   -3.484600
H      -0.430200    0.717300   -2.428200
H      -0.352500    0.905800   -4.181600
103
2LA-2 Molecule Name
P       0.659200    1.444100    0.314900
P      -1.645100   -1.261000    0.248700
O      -2.503700    1.817500   -0.279100
C      -0.398200    2.971900    0.268900
C       0.229600    4.204500    0.537500
H       1.289100    4.215200    0.758800
C      -0.463700    5.409100    0.500300
H       0.058500    6.335200    0.708600
C      -1.820000    5.421600    0.176600
H      -2.367200    6.354800    0.119600
C      -2.470400    4.221300   -0.083800
H      -3.514600    4.211500   -0.364800
C      -1.759300    3.024100   -0.020300
C      -3.088100    1.188300    0.880300
C      -2.767900   -0.131500    1.218600
C      -3.397600   -0.640500    2.373300
H      -3.174200   -1.651900    2.687200
C      -4.281200    0.115600    3.136700
H      -4.735100   -0.319300    4.019200
C      -4.577500    1.423100    2.760200
H      -5.268400    2.024600    3.338600
C      -3.979900    1.957300    1.623600
H      -4.203400    2.970200    1.320500
C       0.921200    1.256000    2.125900
C       2.038900    0.542200    2.592700
H       2.801600    0.202000    1.902900
C       2.177600    0.259500    3.950700
H       3.056600   -0.275700    4.291700
C       1.194800    0.662600    4.857700
H       1.302700    0.437800    5.913100
C       0.077300    1.363900    4.401800
H      -0.689400    1.681700    5.099700
C      -0.057000    1.666000    3.045500
H      -0.929500    2.217100    2.711100
C       2.211700    2.124500   -0.379300
C       3.274200    2.611400    0.391700
H       3.203300    2.635400    1.474000
C       4.449200    3.035600   -0.229600
H       5.283400    3.374400    0.373700
C       4.566000    2.984000   -1.617700
H       5.496200    3.269800   -2.093000
C       3.501400    2.518400   -2.391200
H       3.598700    2.457300   -3.468500
C       2.329800    2.084000   -1.777800
H       1.518900    1.684200   -2.380500
C      -2.829900   -2.115900   -0.863600
C      -4.038600   -2.645600   -0.384900
H      -4.309700   -2.531700    0.659300
C      -4.903200   -3.316800   -1.246200
H      -5.834800   -3.721500   -0.866900
C      -4.571200   -3.463900   -2.595600
H      -5.245200   -3.986400   -3.265400
C      -3.375200   -2.934500   -3.080300
H      -3.115200   -3.037900   -4.127400
C      -2.507000   -2.262100   -2.219000
H      -1.587600   -1.837200   -2.602000
C      -1.232800   -2.506500    1.545000
C      -1.546400   -3.865800    1.425400
H      -2.128100   -4.221600    0.582900
C      -1.096700   -4.778300    2.383400
H      -1.336600   -5.829900    2.272800
C      -0.335400   -4.343700    3.467300
H       0.017600   -5.056100    4.204600
C      -0.022800   -2.987700    3.595600
H       0.573700   -2.636100    4.429800
C      -0.464100   -2.076900    2.640200
H      -0.209300   -1.029200    2.749400
C       1.059400   -2.899300   -2.500000
C       0.547100   -2.644200   -1.054400
H       0.244900   -3.426500   -3.022900
H       1.220700   -3.079200   -0.307700
H      -0.413900   -3.149600   -0.925800
C       2.278600   -3.838900   -2.471700
H       2.611300   -4.080700   -3.488000
H       3.113800   -3.359400   -1.948000
H       2.045500   -4.776200   -1.953900
C       1.378800   -1.656200   -3.352400
H       1.539400   -1.952800   -4.396000
H       0.562300   -0.927900   -3.329700
H       2.290100   -1.159800   -3.005700
C       2.246200   -0.847600   -0.508800
N       3.403800   -0.993900   -0.387100
Ni      0.389100   -0.728700   -0.483800
Al      5.323800   -1.228100    0.001500
Cl      6.325500   -0.075000   -1.631400
C       5.529500   -0.333100    1.766700
H       4.979300   -0.873500    2.551400
H       6.584500   -0.300100    2.067600
H       5.164600    0.702000    1.734400
C       5.637500   -3.175700   -0.171200
H       5.488900   -3.509300   -1.205800
H       6.663800   -3.440800    0.114600
H       4.951700   -3.746800    0.470000
Al     -3.244600    1.614100   -2.190800
Cl     -1.315700    0.906300   -3.041900
C      -4.771200    0.398000   -1.927800
H      -5.689600    0.953200   -2.161300
H      -4.726800   -0.467900   -2.597700
H      -4.867300    0.010200   -0.908400
C      -3.613900    3.407600   -2.930800
H      -4.485000    3.896800   -2.475100
H      -2.758400    4.088800   -2.876200
H      -3.846900    3.270200   -3.996500
103
2LA-3 Molecule Name
P      -0.627700   -1.687300    0.055000
P       0.783700    1.651100    0.097600
O       2.614800   -1.040100    0.352700
C       0.839800   -2.811700   -0.026400
C       0.627000   -4.157800   -0.381400
H      -0.388400   -4.510400   -0.495300
C       1.666100   -5.047700   -0.635600
H       1.442400   -6.070200   -0.915400
C       2.979100   -4.606400   -0.538700
H       3.810000   -5.271700   -0.739200
C       3.230600   -3.284300   -0.184200
H       4.250900   -2.945600   -0.118300
C       2.187700   -2.397500    0.064700
C       2.236600   -0.393200    1.580900
C       1.561600    0.839000    1.587600
C       1.484900    1.479700    2.838900
H       1.010700    2.450100    2.903000
C       1.990700    0.909200    4.004400
H       1.900200    1.442700    4.943100
C       2.609200   -0.337200    3.959500
H       3.002400   -0.794800    4.859200
C       2.744300   -0.980700    2.734600
H       3.254600   -1.933800    2.657700
C      -0.960900   -1.479300    1.857800
C      -2.083200   -0.706900    2.199700
H      -2.665400   -0.215000    1.427600
C      -2.475000   -0.579800    3.530400
H      -3.357300    0.004700    3.768500
C      -1.745200   -1.213900    4.539000
H      -2.047000   -1.112000    5.575700
C      -0.638200   -1.994100    4.205700
H      -0.076100   -2.502000    4.982100
C      -0.255600   -2.138400    2.870300
H       0.588600   -2.771600    2.621000
C      -2.103500   -2.737000   -0.305000
C      -2.463200   -3.825900    0.512400
H      -1.823300   -4.119000    1.339000
C      -3.655800   -4.508000    0.293500
H      -3.921900   -5.344400    0.930600
C      -4.525200   -4.094600   -0.721900
H      -5.467200   -4.609700   -0.872600
C      -4.197500   -2.997500   -1.514100
H      -4.888700   -2.625300   -2.260100
C      -2.988500   -2.327100   -1.308800
H      -2.771600   -1.447600   -1.899400
C       2.099900    2.744600   -0.552100
C       2.527300    3.886100    0.145600
H       2.085100    4.136000    1.104200
C       3.508200    4.710300   -0.398000
H       3.831500    5.592700    0.142600
C       4.080700    4.398000   -1.635900
H       4.847300    5.040700   -2.054200
C       3.670800    3.258300   -2.326500
H       4.123700    2.996600   -3.275700
C       2.678100    2.437900   -1.786600
H       2.363200    1.546300   -2.310700
C      -0.428000    2.848100    0.804900
C      -0.694300    4.027600    0.090900
H      -0.075000    4.306200   -0.754700
C      -1.771400    4.839600    0.443500
H      -1.973100    5.739200   -0.126700
C      -2.596900    4.489600    1.512500
H      -3.441300    5.116000    1.776300
C      -2.340800    3.319100    2.226400
H      -2.985500    3.028400    3.048400
C      -1.270500    2.501300    1.870600
H      -1.116400    1.576000    2.410800
H       1.097400   -0.215400   -1.368800
C      -2.017000    0.948000   -0.958500
N      -3.120900    1.310300   -0.797800
Ni     -0.286200    0.240300   -1.211400
Al     -5.035300    1.603700   -0.486200
Cl     -5.850000    0.222800   -2.070500
C      -5.308500    0.863400    1.337800
H      -4.640800    1.367100    2.052400
H      -6.339300    1.005900    1.685700
H      -5.096600   -0.213600    1.363600
C      -5.421100    3.497800   -0.908100
H      -6.499900    3.677200   -0.997700
H      -5.029100    4.166700   -0.130800
H      -4.957600    3.780500   -1.861700
C       0.244000   -0.586200   -3.567700
C      -0.887500    0.159200   -3.409100
H      -1.855100   -0.309600   -3.276300
H      -0.897600    1.215900   -3.659500
C       1.501500    0.005700   -4.152500
H       2.392800   -0.283600   -3.589200
H       1.624400   -0.382600   -5.172400
H       1.445400    1.095300   -4.214000
C       0.241300   -2.091900   -3.454000
H       1.106500   -2.439300   -2.881200
H      -0.669200   -2.470200   -2.982900
H       0.317300   -2.530700   -4.457300
Al      4.674600   -0.364400   -0.007300
Cl      4.606400   -0.620100   -2.203900
C       4.871500    1.450000    0.727300
H       5.839000    1.457500    1.248700
H       4.905200    2.218400   -0.049400
H       4.108000    1.740400    1.454400
C       5.859900   -1.684700    0.892300
H       6.710700   -1.111600    1.285300
H       5.409300   -2.206100    1.746100
H       6.270800   -2.439900    0.211100
91
2LA-4 Molecule Name
P      -1.669900    1.506100   -0.223700
P       0.751900   -0.798500    0.780400
O      -1.927000   -1.624000   -0.659500
C      -3.048800    0.559200   -0.996000
C      -4.186500    1.236500   -1.466700
H      -4.210600    2.318100   -1.433200
C      -5.287500    0.549800   -1.974700
H      -6.144300    1.104900   -2.337300
C      -5.281600   -0.841200   -2.013700
H      -6.127300   -1.388300   -2.411300
C      -4.166400   -1.539600   -1.556000
H      -4.131000   -2.617600   -1.626300
C      -3.067400   -0.840100   -1.071300
C      -1.865100   -1.951600    0.746100
C      -0.759400   -1.568900    1.522700
C      -0.847100   -1.823500    2.901400
H      -0.047100   -1.490600    3.549600
C      -1.946500   -2.468100    3.464000
H      -1.978200   -2.638600    4.533600
C      -2.993700   -2.893600    2.651000
H      -3.842600   -3.419200    3.071400
C      -2.953800   -2.626300    1.285200
H      -3.769000   -2.932100    0.643400
C      -2.084000    1.405600    1.568900
C      -1.155000    1.940400    2.473600
H      -0.256900    2.420700    2.104100
C      -1.372300    1.857700    3.847000
H      -0.635600    2.262200    4.531700
C      -2.529600    1.245900    4.332600
H      -2.698200    1.172300    5.401200
C      -3.470100    0.731400    3.439400
H      -4.372200    0.258800    3.811500
C      -3.252900    0.812800    2.063200
H      -3.989200    0.401400    1.382400
C      -2.098900    3.250300   -0.628700
C      -2.892600    4.026800    0.230300
H      -3.241900    3.616200    1.170600
C      -3.235100    5.334200   -0.117300
H      -3.840000    5.927900    0.558900
C      -2.799700    5.875700   -1.327300
H      -3.062000    6.893600   -1.593100
C      -2.018600    5.106300   -2.191400
H      -1.671900    5.521800   -3.130500
C      -1.665800    3.803500   -1.843100
H      -1.043200    3.220900   -2.513300
C       1.713200   -2.281800    0.266700
C       1.650700   -3.477700    1.001400
H       0.929900   -3.590300    1.804600
C       2.487600   -4.545600    0.686900
H       2.423900   -5.464700    1.258500
C       3.389500   -4.439400   -0.373800
H       4.039900   -5.271100   -0.620300
C       3.449700   -3.261400   -1.117700
H       4.154000   -3.161100   -1.935200
C       2.619800   -2.185500   -0.798700
H       2.701300   -1.274000   -1.375500
C       1.779800   -0.179700    2.181600
C       2.344600   -1.025300    3.151600
H       2.167600   -2.094000    3.116800
C       3.177900   -0.510700    4.142700
H       3.608500   -1.178400    4.880400
C       3.482200    0.852000    4.167900
H       4.148900    1.246200    4.926400
C       2.957100    1.696200    3.191000
H       3.227000    2.745400    3.170900
C       2.114100    1.182700    2.205600
H       1.754600    1.842600    1.424100
H       0.303400    2.020000   -1.608500
C       2.171000    1.140100   -1.128600
N       3.318500    1.311100   -1.293100
Ni      0.392700    0.897700   -0.683400
Al      5.304400    1.380000   -1.257700
Cl      5.770700    2.939900   -2.775900
C       5.656100    1.983800    0.599500
H       5.307100    1.235900    1.325100
H       6.725800    2.153600    0.776300
H       5.133100    2.927500    0.803400
C       5.805500   -0.446900   -1.847000
H       5.564000   -1.184400   -1.069200
H       5.267100   -0.720200   -2.764800
H       6.879000   -0.523500   -2.060200
Al     -0.975400   -2.771500   -2.217600
Cl     -2.592200   -3.350800   -3.652400
C      -0.510500   -4.402300   -1.216600
H      -1.107000   -5.230000   -1.617000
H       0.548000   -4.656500   -1.343100
H      -0.703100   -4.334800   -0.140400
C       0.021400   -1.286400   -3.028800
H       0.727300   -1.648400   -3.787000
H      -0.678900   -0.610100   -3.534900
H       0.599600   -0.693900   -2.309500
110
2LA-5 Molecule Name
P      -1.580500    1.359300    0.701000
P       1.357400   -0.781900   -0.878800
O       0.731700    2.468800   -1.312400
C      -1.255500    3.064900    0.075500
C      -2.149100    4.086000    0.451600
H      -2.888700    3.876100    1.214400
C      -2.121400    5.348500   -0.129100
H      -2.824700    6.106400    0.194600
C      -1.200200    5.621000   -1.137200
H      -1.171000    6.592000   -1.616400
C      -0.299500    4.635300   -1.524700
H       0.437400    4.848800   -2.284800
C      -0.315000    3.383600   -0.910100
C       0.490100    1.571800   -2.425800
C       0.849600    0.206600   -2.385700
C       0.716400   -0.492500   -3.602600
H       0.998700   -1.536000   -3.635200
C       0.201100    0.087400   -4.758200
H       0.110200   -0.504700   -5.660700
C      -0.204600    1.416600   -4.736600
H      -0.628700    1.884600   -5.616700
C      -0.040900    2.158100   -3.570800
H      -0.329900    3.199300   -3.557900
C      -3.034100    0.997400   -0.373000
C      -2.831400    0.238400   -1.532300
H      -1.856500   -0.188900   -1.735800
C      -3.881600    0.001100   -2.418200
H      -3.717700   -0.625400   -3.285500
C      -5.146900    0.521700   -2.152100
H      -5.969000    0.317000   -2.828300
C      -5.358800    1.285200   -1.001900
H      -6.344300    1.682800   -0.786400
C      -4.309100    1.526300   -0.117800
H      -4.492000    2.107300    0.779600
C      -2.275200    1.610200    2.374200
C      -3.256600    0.718600    2.838600
H      -3.688900   -0.017300    2.167600
C      -3.668400    0.762800    4.170400
H      -4.426600    0.069800    4.517200
C      -3.102300    1.686500    5.051500
H      -3.421700    1.716000    6.087200
C      -2.118500    2.567200    4.597900
H      -1.669400    3.280700    5.279800
C      -1.701200    2.528200    3.266900
H      -0.922600    3.204900    2.927500
C       3.172600   -0.600300   -0.781200
C       4.000200   -0.986900   -1.849600
H       3.561100   -1.347800   -2.774200
C       5.383400   -0.919400   -1.722600
H       6.017100   -1.219400   -2.549700
C       5.954600   -0.456700   -0.531600
H       7.033500   -0.403600   -0.434100
C       5.138700   -0.059900    0.525700
H       5.571100    0.305300    1.449400
C       3.749900   -0.134300    0.400800
H       3.114300    0.179400    1.216500
C       1.165300   -2.541100   -1.417100
C       2.190700   -3.474200   -1.196600
H       3.147800   -3.153700   -0.805900
C       1.984200   -4.830900   -1.454600
H       2.789200   -5.535700   -1.274400
C       0.754900   -5.277300   -1.936600
H       0.593600   -6.332000   -2.130100
C      -0.274300   -4.360300   -2.158400
H      -1.247700   -4.683000   -2.509600
C      -0.072200   -3.007400   -1.895700
H      -0.903000   -2.329400   -2.056400
H       0.872300    0.917500    0.756800
C      -1.317800   -1.615100    0.581300
N      -2.176600   -2.409700    0.490900
Ni     -0.049900   -0.219800    0.706100
Al     -3.769600   -3.497800    0.109600
C      -3.375100   -5.310900    0.790800
H      -2.435900   -5.681200    0.359700
H      -3.267100   -5.312800    1.883900
H      -4.165200   -6.026000    0.529900
C      -5.232400   -2.347000    0.790900
H      -5.145600   -2.210600    1.878800
H      -5.184600   -1.358600    0.314500
H      -6.225400   -2.765800    0.586400
Cl     -3.739600   -3.493600   -2.157200
C       1.224700   -0.666500    3.281900
C      -0.066600   -1.058900    3.194800
H      -0.872700   -0.382100    3.454500
H      -0.344800   -2.088000    3.002900
C       1.569200    0.723800    3.761200
H       2.340900    1.195300    3.147300
H       0.686300    1.365100    3.738600
H       1.932700    0.690600    4.796300
C       2.346100   -1.620100    3.044500
C       3.604700   -1.398200    3.625300
C       2.180300   -2.756100    2.234200
C       4.658800   -2.287100    3.414400
H       3.768200   -0.524800    4.246100
C       3.230100   -3.648100    2.032200
H       1.233700   -2.931400    1.732900
C       4.475800   -3.417200    2.618800
H       5.622300   -2.095600    3.874500
H       3.073800   -4.518300    1.404400
H       5.294300   -4.109200    2.453500
Al      2.671100    3.300300   -0.999400
C       3.796900    2.287800   -2.254600
H       4.194500    3.015800   -2.975100
H       4.648400    1.816800   -1.752100
H       3.279400    1.508100   -2.819800
C       2.715700    5.254600   -1.316700
H       2.547900    5.540100   -2.363800
H       2.045300    5.834400   -0.675000
H       3.744000    5.559500   -1.069300
Cl      2.693700    3.029100    1.200600
110
2LA-6 Molecule Name
P      -1.471800    1.412500    0.615600
P       1.332800   -0.714700   -0.920900
O       0.707900    2.490900   -1.366700
C      -1.263400    3.139900   -0.022400
C      -2.158800    4.166800    0.330000
H      -2.903900    3.972200    1.091400
C      -2.115600    5.419600   -0.272600
H      -2.821300    6.185400    0.027200
C      -1.172300    5.681000   -1.265800
H      -1.128600    6.650300   -1.747400
C      -0.268000    4.689300   -1.628800
H       0.495000    4.890200   -2.368900
C      -0.317200    3.446200   -1.000700
C       0.443100    1.600000   -2.480200
C       0.760500    0.227500   -2.427500
C       0.551000   -0.495100   -3.619600
H       0.791800   -1.549700   -3.636700
C       0.010500    0.079100   -4.766000
H      -0.144700   -0.529000   -5.649000
C      -0.335900    1.425400   -4.760700
H      -0.773800    1.891300   -5.635100
C      -0.102400    2.185100   -3.619000
H      -0.357200    3.234900   -3.619000
C      -2.901800    0.969000   -0.469100
C      -2.671500    0.114700   -1.553100
H      -1.694500   -0.330800   -1.685300
C      -3.690600   -0.187000   -2.456300
H      -3.502100   -0.882600   -3.264000
C      -4.958800    0.361900   -2.279100
H      -5.758300    0.109600   -2.966200
C      -5.203500    1.215400   -1.200100
H      -6.192500    1.634700   -1.051300
C      -4.183000    1.519400   -0.302000
H      -4.392500    2.171700    0.538700
C      -2.258800    1.675300    2.253900
C      -3.234100    0.766700    2.699100
H      -3.610300   -0.000900    2.030100
C      -3.721300    0.839600    4.004400
H      -4.475400    0.132400    4.331200
C      -3.240500    1.813000    4.882600
H      -3.622400    1.868400    5.895900
C      -2.264200    2.712900    4.451400
H      -1.880700    3.467200    5.129800
C      -1.770400    2.641500    3.147900
H      -0.998000    3.335600    2.829600
C       3.165600   -0.580100   -1.029300
C       3.818900   -0.863200   -2.241200
H       3.240700   -1.065300   -3.136600
C       5.208000   -0.895600   -2.303900
H       5.700100   -1.111500   -3.245600
C       5.966300   -0.646500   -1.154900
H       7.049400   -0.675200   -1.204100
C       5.327200   -0.363900    0.050400
H       5.900700   -0.174700    0.950200
C       3.931700   -0.331700    0.112300
H       3.452400   -0.109600    1.053400
C       1.129000   -2.499200   -1.383900
C       2.173200   -3.401000   -1.115200
H       3.129500   -3.041100   -0.755800
C       1.990400   -4.773200   -1.291300
H       2.809200   -5.451700   -1.075400
C       0.767800   -5.268600   -1.742600
H       0.625200   -6.335000   -1.877200
C      -0.278000   -4.384600   -2.011200
H      -1.246800   -4.744500   -2.338000
C      -0.101400   -3.014300   -1.826000
H      -0.950100   -2.366000   -2.013700
C       1.227500   -0.335400    2.968900
C      -0.109200   -0.997700    2.920700
H      -0.935600   -0.453400    3.375500
H      -0.145800   -2.065900    3.114400
C       1.287100    0.826000    3.975900
H       2.159100    1.462800    3.815500
H       0.395800    1.446800    3.872000
H       1.313000    0.422200    4.993100
C      -1.252700   -1.745000    0.758400
N      -2.173300   -2.451500    0.582800
Ni      0.088200   -0.523300    1.055400
C       2.409700   -1.300800    3.012900
C       3.580400   -0.985800    3.712100
C       2.369700   -2.501700    2.287300
C       4.683700   -1.842900    3.681400
H       3.648800   -0.064100    4.276600
C       3.466800   -3.358900    2.260100
H       1.484500   -2.760400    1.714000
C       4.632600   -3.031200    2.954900
H       5.582400   -1.577000    4.227700
H       3.409000   -4.278500    1.687600
H       5.489900   -3.694800    2.929200
Al     -3.807400   -3.478600    0.205300
C      -3.505300   -5.258400    1.014400
H      -2.580100   -5.702000    0.624400
H      -3.410200   -5.187600    2.106500
H      -4.325700   -5.952200    0.792000
C      -5.237600   -2.237800    0.790100
H      -5.190400   -2.073700    1.876600
H      -5.127600   -1.266800    0.289700
H      -6.238900   -2.619500    0.555300
Cl     -3.751900   -3.639300   -2.053400
H       1.374200    0.246300    1.940200
Al      2.605200    3.217800   -0.848900
C       3.766700    2.432700   -2.227700
H       4.171500    3.264500   -2.820300
H       4.612900    1.890100   -1.792700
H       3.259700    1.747500   -2.913800
C       2.624500    5.191900   -0.738700
H       2.575300    5.692400   -1.714000
H       1.847300    5.607000   -0.089300
H       3.594100    5.457200   -0.291200
Cl      2.530300    2.524600    1.264600
110
2LA-7 Molecule Name 
P      -0.189400   -1.681100    0.054800
P       1.535900    1.567800    0.262500
O       3.013900   -1.308500    0.376200
C       1.169400   -2.936700    0.226800
C       0.796500   -4.295300    0.251600
H      -0.238700   -4.555500    0.067400
C       1.715000   -5.306800    0.503400
H       1.388600   -6.339900    0.511700
C       3.051600   -4.987500    0.744500
H       3.780800   -5.764700    0.938100
C       3.451200   -3.657000    0.718000
H       4.491500   -3.395300    0.857300
C       2.513000   -2.658300    0.459300
C       3.043100   -0.534000    1.594200
C       2.462100    0.742100    1.649700
C       2.567400    1.419000    2.881600
H       2.117600    2.399400    2.975800
C       3.196700    0.856900    3.988700
H       3.243500    1.410600    4.918700
C       3.754000   -0.415300    3.894100
H       4.244000   -0.870600    4.746200
C       3.680800   -1.108000    2.689500
H       4.111800   -2.095700    2.610600
C      -0.966000   -1.977200    1.695300
C      -0.496400   -1.183200    2.751400
H       0.239700   -0.409800    2.562700
C      -0.965200   -1.373900    4.048400
H      -0.612700   -0.730800    4.846000
C      -1.913700   -2.361500    4.307100
H      -2.306900   -2.489100    5.308800
C      -2.373700   -3.169300    3.267800
H      -3.115800   -3.935500    3.462000
C      -1.897100   -2.988000    1.969900
H      -2.262600   -3.633700    1.180400
C      -1.216500   -2.492100   -1.236300
C      -2.611900   -2.592300   -1.140900
H      -3.138600   -2.207400   -0.276800
C      -3.346900   -3.161100   -2.181500
H      -4.422800   -3.248200   -2.080200
C      -2.707300   -3.591700   -3.343300
H      -3.282800   -4.022700   -4.155100
C      -1.322300   -3.452400   -3.463800
H      -0.818700   -3.764500   -4.371900
C      -0.577500   -2.913000   -2.416000
H       0.497700   -2.807600   -2.524600
C       2.849300    2.522100   -0.594400
C       3.784000    3.280800    0.129200
H       3.773500    3.267300    1.214100
C       4.733000    4.052300   -0.536500
H       5.450800    4.632500    0.032500
C       4.763100    4.072100   -1.933700
H       5.503700    4.671600   -2.451600
C       3.845200    3.314000   -2.659900
H       3.870900    3.314000   -3.743600
C       2.890800    2.542900   -1.993600
H       2.197000    1.935500   -2.559700
C       0.580100    2.872300    1.161500
C       0.794700    4.242500    0.959100
H       1.608800    4.586000    0.332900
C      -0.057500    5.184000    1.543100
H       0.118000    6.240200    1.369900
C      -1.132400    4.771400    2.328700
H      -1.799700    5.504400    2.768300
C      -1.359800    3.408000    2.533700
H      -2.206100    3.058800    3.115300
C      -0.512000    2.468500    1.953300
H      -0.741300    1.419300    2.099600
C      -1.242400    1.878900   -3.023900
C      -0.633600    2.199700   -1.638300
H      -1.186200    2.825700   -3.589700
H      -1.308200    2.805100   -1.026700
H       0.293700    2.766800   -1.776700
C      -0.407100    0.850600   -3.797900
H      -0.835000    0.661800   -4.788500
H       0.617200    1.209500   -3.933400
H      -0.346400   -0.107000   -3.267200
C      -2.051000    0.463000   -0.273900
N      -3.097600    0.505700    0.253800
Ni     -0.223400    0.529700   -0.650800
C      -2.720500    1.527600   -2.940300
C      -3.215300    0.247200   -3.208600
C      -3.625600    2.520300   -2.535600
C      -4.572800   -0.039400   -3.046300
H      -2.543200   -0.545900   -3.517400
C      -4.976600    2.236400   -2.365900
H      -3.257000    3.522000   -2.330500
C      -5.455800    0.946900   -2.613400
H      -4.934200   -1.041900   -3.248200
H      -5.654700    3.011100   -2.026100
H      -6.506500    0.719300   -2.468900
Al     -4.725500    0.482000    1.343300
C      -5.798000    2.104000    0.975200
H      -5.146100    2.937000    0.681900
H      -6.519700    1.938900    0.165600
H      -6.353400    2.410100    1.870800
C      -5.435800   -1.349900    1.060500
H      -5.580300   -1.533100   -0.014600
H      -4.743000   -2.105300    1.454800
H      -6.402600   -1.497100    1.558100
Cl     -3.763200    0.702500    3.384800
Al      4.254700   -1.038600   -1.261600
Cl      2.567400   -0.783100   -2.692400
C       5.419300    0.437100   -0.679000
H       6.442200    0.041800   -0.615000
H       5.428100    1.270100   -1.390100
H       5.160300    0.850200    0.301200
C       5.150400   -2.737300   -1.727200
H       5.912800   -3.043600   -0.999400
H       4.458000   -3.570800   -1.883200
H       5.670000   -2.566100   -2.681300
110
2LA-8 Molecule Name
P      -0.652400    1.875300   -0.011700
P      -0.986600   -1.754300    0.548300
O      -3.002700    0.054100   -1.114600
C      -2.078700    2.333800   -1.126700
C      -2.224800    3.649200   -1.607600
H      -1.423000    4.359100   -1.445800
C      -3.367500    4.064300   -2.286200
H      -3.438300    5.086100   -2.640500
C      -4.413100    3.169800   -2.509400
H      -5.306600    3.480700   -3.037100
C      -4.285000    1.854400   -2.077800
H      -5.052000    1.122900   -2.299000
C      -3.127600    1.460900   -1.411500
C      -3.501000   -0.416500    0.158700
C      -2.723800   -1.259900    0.968600
C      -3.293300   -1.654000    2.192600
H      -2.712800   -2.283500    2.856600
C      -4.556100   -1.228400    2.594500
H      -4.953300   -1.545100    3.551700
C      -5.295300   -0.388000    1.766700
H      -6.276800   -0.039800    2.065400
C      -4.766700    0.014800    0.543400
H      -5.335200    0.676400   -0.094600
C      -1.449900    2.426600    1.560800
C      -1.560000    1.511600    2.613000
H      -1.116100    0.532000    2.519500
C      -2.228600    1.849200    3.789400
H      -2.299500    1.121700    4.590000
C      -2.787000    3.117600    3.933700
H      -3.301600    3.386300    4.850000
C      -2.677000    4.045100    2.894700
H      -3.106000    5.035500    3.001800
C      -2.020800    3.700400    1.715100
H      -1.958000    4.429100    0.915000
C       0.523900    3.191800   -0.517100
C       0.902900    4.271900    0.286200
H       0.562500    4.333600    1.312500
C       1.752300    5.256700   -0.224900
H       2.050600    6.084500    0.408700
C       2.228000    5.168500   -1.531900
H       2.889000    5.934400   -1.922300
C       1.878100    4.073900   -2.327600
H       2.266100    3.985800   -3.336500
C       1.039600    3.084500   -1.820700
H       0.775700    2.229400   -2.437500
C      -1.233000   -3.368600   -0.296500
C      -2.233100   -4.282200    0.071500
H      -2.964000   -4.014900    0.828100
C      -2.313600   -5.527700   -0.548300
H      -3.092200   -6.224600   -0.258600
C      -1.403000   -5.872100   -1.550400
H      -1.470500   -6.839800   -2.035100
C      -0.420200   -4.961100   -1.938600
H       0.275200   -5.211700   -2.732400
C      -0.338100   -3.715100   -1.315500
H       0.392500   -2.987200   -1.643700
C      -0.267400   -2.287400    2.175800
C      -0.433800   -3.567700    2.730100
H      -1.027300   -4.315100    2.216900
C       0.187700   -3.906900    3.933000
H       0.051600   -4.902100    4.342700
C       0.989800   -2.978800    4.600100
H       1.476000   -3.249100    5.531100
C       1.175100   -1.708700    4.053900
H       1.807100   -0.974100    4.540300
C       0.557500   -1.370100    2.850600
H       0.753400   -0.385000    2.439400
C       3.702100   -2.544400   -1.261400
C       2.759700   -2.317800   -0.038300
H       4.130000   -3.543300   -1.100100
H       3.364500   -2.324100    0.877000
H       2.049500   -3.147000    0.022000
C       2.930400   -2.579900   -2.589900
H       3.626200   -2.660400   -3.430400
H       2.261400   -3.445900   -2.621300
H       2.320100   -1.682900   -2.736700
C       2.014400   -1.027600   -0.071500
N       2.263700    0.177200    0.090600
Ni      0.345000   -0.147300   -0.136100
C       4.866100   -1.567200   -1.278800
C       4.754700   -0.289200   -1.841600
C       6.089200   -1.943300   -0.709000
C       5.837800    0.590300   -1.824100
H       3.817800    0.032000   -2.283000
C       7.173000   -1.065900   -0.688700
H       6.189600   -2.931700   -0.268600
C       7.048200    0.207400   -1.245500
H       5.727400    1.582000   -2.247700
H       8.109300   -1.374000   -0.236000
H       7.884800    0.897300   -1.226600
Al      3.484900    1.282000    1.213300
C       4.580600   -0.068500    2.167300
H       3.945300   -0.830600    2.640500
H       5.294400   -0.571000    1.503300
H       5.152500    0.417200    2.969400
C       4.289600    2.804700    0.249300
H       3.878600    2.900400   -0.762300
H       4.098600    3.747200    0.775100
H       5.375200    2.668800    0.166200
Cl      1.936600    1.989500    2.738600
Al     -2.650700   -0.966500   -2.892900
Cl     -0.429300   -0.678300   -2.976400
C      -3.518700   -2.698400   -2.543600
H      -4.364700   -2.779400   -3.240000
H      -2.858400   -3.553600   -2.720200
H      -3.912400   -2.793200   -1.526000
C      -3.349100    0.082600   -4.413600
H      -4.443900    0.145900   -4.441700
H      -2.938800    1.096500   -4.463200
H      -3.031000   -0.440400   -5.327600
110
2LA-9 Molecule Name
P       1.188700   -1.748300   -0.812800
P      -0.097200    2.177400   -0.213000
O       1.877000    0.283600    1.567000
C       1.585400   -2.108300    0.964600
C       1.687200   -3.445800    1.388600
H       1.370200   -4.233400    0.716600
C       2.183500   -3.790200    2.641800
H       2.232900   -4.832300    2.933100
C       2.650000   -2.793900    3.494600
H       3.096200   -3.044400    4.449200
C       2.550500   -1.461700    3.108900
H       2.969200   -0.686600    3.737300
C       1.962400   -1.125300    1.889800
C       0.932200    1.129800    2.283300
C       0.251000    2.157600    1.604300
C      -0.439500    3.093900    2.398700
H      -0.971100    3.899200    1.906300
C      -0.530600    2.977600    3.780800
H      -1.081200    3.714400    4.352600
C       0.045000    1.876100    4.403700
H      -0.064700    1.721500    5.470200
C       0.784200    0.963100    3.656800
H       1.222600    0.121700    4.165200
C       0.294600   -3.258000   -1.355400
C      -0.822400   -3.703900   -0.627000
H      -1.110500   -3.229700    0.303600
C      -1.590100   -4.770600   -1.090200
H      -2.447200   -5.088200   -0.507200
C      -1.257000   -5.402400   -2.290900
H      -1.857400   -6.228500   -2.655200
C      -0.150800   -4.966200   -3.020900
H       0.111700   -5.451400   -3.954600
C       0.623200   -3.899900   -2.558100
H       1.476400   -3.568100   -3.139500
C       2.860300   -1.912600   -1.558100
C       3.462900   -0.819200   -2.187300
H       2.928800    0.118900   -2.271000
C       4.773000   -0.911600   -2.664800
H       5.232800   -0.043100   -3.121100
C       5.484400   -2.100800   -2.528800
H       6.503000   -2.171000   -2.894200
C       4.886100   -3.204500   -1.912300
H       5.435700   -4.132800   -1.803000
C       3.586100   -3.111000   -1.425700
H       3.136600   -3.970700   -0.941000
C       0.870700    3.535400   -0.957800
C       1.278700    4.654400   -0.222100
H       1.088600    4.709500    0.843700
C       1.965700    5.691800   -0.850200
H       2.296900    6.545700   -0.270100
C       2.236600    5.626200   -2.217500
H       2.774400    6.433100   -2.702900
C       1.825600    4.516300   -2.957000
H       2.044200    4.455400   -4.017300
C       1.151300    3.471100   -2.328400
H       0.864700    2.590600   -2.893900
C      -1.814800    2.864300   -0.251200
C      -2.147900    3.930400   -1.098800
H      -1.391000    4.394600   -1.720500
C      -3.457200    4.418300   -1.140100
H      -3.697900    5.244200   -1.800700
C      -4.441600    3.858200   -0.329200
H      -5.454900    4.243700   -0.356700
C      -4.120100    2.791000    0.512700
H      -4.878600    2.330800    1.135400
C      -2.823300    2.290200    0.544100
H      -2.603500    1.458600    1.200500
C      -1.160200   -0.531400    0.387500
N      -1.808000   -0.936100    1.277700
Ni      0.058200    0.109700   -0.884600
H       1.136000    0.633900   -1.722100
C      -4.257100   -0.263000    3.045100
H      -4.763300   -0.075200    2.088800
H      -5.016700   -0.575400    3.771900
H      -3.826400    0.685700    3.397500
C      -1.450600   -2.015700    4.152700
H      -0.576500   -2.483500    3.678800
H      -1.116400   -1.092800    4.646500
H      -1.815300   -2.700800    4.927900
Cl     -3.620500   -3.522900    1.856600
Al     -2.838900   -1.622000    2.790700
C      -1.387800    0.633300   -3.158300
C      -2.211000   -0.415100   -2.957000
H      -1.633900    1.624100   -2.789100
H      -0.488400    0.534600   -3.758100
C      -3.506300   -0.263200   -2.234800
C      -3.934500   -1.223100   -1.304400
C      -4.338100    0.834800   -2.499900
C      -5.152200   -1.078200   -0.641700
H      -3.307200   -2.075000   -1.065000
C      -5.565500    0.968500   -1.853600
H      -4.025700    1.576900   -3.227300
C      -5.974800    0.015600   -0.919800
H      -5.444600   -1.820200    0.093400
H      -6.198300    1.821200   -2.076100
H      -6.928100    0.121700   -0.412900
C      -1.922000   -1.772600   -3.547900
H      -1.985300   -2.564600   -2.797600
H      -2.664900   -2.004700   -4.320800
H      -0.925900   -1.808700   -3.996100
Al      3.843700    1.118800    1.322600
Cl      3.868600    2.240900   -0.576000
C       3.815200    2.323700    2.885800
H       3.664600    1.794000    3.835800
H       4.776100    2.850800    2.950700
H       3.031100    3.085900    2.802700
C       4.973200   -0.492000    1.181400
H       5.916100   -0.204400    0.698300
H       5.211900   -0.926400    2.159500
H       4.528100   -1.280100    0.564200
110
2LA-TS11-12 Molecule Name
P       0.047600   -2.033000   -0.212500
P       1.039900    1.403000    0.464200
O       3.112800   -1.024700   -0.231300
C       1.624600   -2.998600   -0.392300
C       1.548200   -4.396700   -0.535100
H       0.575200   -4.863500   -0.613100
C       2.683000   -5.200700   -0.582900
H       2.576000   -6.272600   -0.698500
C       3.945500   -4.622700   -0.481000
H       4.840800   -5.231700   -0.515800
C       4.055900   -3.242700   -0.344700
H       5.030200   -2.779000   -0.298900
C       2.909200   -2.450000   -0.308200
C       3.253300   -0.406800    1.071300
C       2.467700    0.694100    1.429000
C       2.790100    1.310300    2.653800
H       2.220300    2.177300    2.963500
C       3.793700    0.835000    3.488500
H       4.002500    1.340700    4.423600
C       4.526600   -0.289000    3.112700
H       5.314900   -0.673900    3.748600
C       4.263300   -0.901900    1.893100
H       4.856200   -1.748700    1.578500
C      -0.277200   -2.296900    1.582200
C      -1.586900   -2.136300    2.064400
H      -2.390500   -1.900300    1.379400
C      -1.863900   -2.279400    3.421800
H      -2.883300   -2.155200    3.769700
C      -0.836000   -2.562200    4.323000
H      -1.051400   -2.670000    5.380500
C       0.470600   -2.711000    3.855900
H       1.275700   -2.932900    4.547900
C       0.748800   -2.588500    2.493400
H       1.768400   -2.727000    2.153600
C      -1.154800   -3.146800   -1.054200
C      -1.845500   -4.187200   -0.418700
H      -1.695700   -4.375900    0.638300
C      -2.750400   -4.972100   -1.135200
H      -3.297500   -5.757300   -0.626400
C      -2.969500   -4.731600   -2.491200
H      -3.682600   -5.334800   -3.041700
C      -2.281100   -3.701000   -3.134800
H      -2.454000   -3.503100   -4.186700
C      -1.383800   -2.912300   -2.418300
H      -0.867000   -2.097500   -2.916200
C       1.635000    3.107000    0.088700
C       1.565100    4.170600    1.000400
H       1.138500    4.018800    1.985300
C       2.004800    5.442900    0.638100
H       1.938500    6.256600    1.351900
C       2.526100    5.669000   -0.637400
H       2.871100    6.658700   -0.916200
C       2.605700    4.617200   -1.550100
H       3.022800    4.778600   -2.537400
C       2.158300    3.347500   -1.188000
H       2.229700    2.535700   -1.903400
C      -0.197500    1.681500    1.807700
C      -1.175900    2.671300    1.609800
H      -1.141700    3.304600    0.732200
C      -2.193000    2.859000    2.541800
H      -2.942900    3.620300    2.360000
C      -2.251900    2.064700    3.687400
H      -3.052100    2.202200    4.405400
C      -1.291400    1.075000    3.887900
H      -1.334800    0.439800    4.765300
C      -0.276000    0.875900    2.952400
H       0.446900    0.087600    3.125300
C      -2.073300   -0.017600   -0.740700
N      -3.116900   -0.273100   -0.238500
Ni     -0.295500    0.086100   -0.870000
Al     -4.886100   -0.643400    0.498800
Cl     -6.173900    0.481500   -0.970400
C      -5.115100   -2.604300    0.311600
H      -4.854900   -2.925700   -0.704700
H      -4.475600   -3.160600    1.011800
H      -6.154400   -2.901200    0.501800
C      -4.915600    0.223700    2.279700
H      -4.096100   -0.141700    2.913700
H      -4.788400    1.308400    2.178500
H      -5.863800    0.041700    2.801700
C      -0.460100    1.055100   -3.121600
C      -1.720000    1.185400   -2.254100
H       0.473000    1.342300   -2.626300
H      -0.353500    0.040300   -3.514400
H      -0.571500    1.718200   -3.991100
C      -1.997600    2.580800   -1.744600
C      -3.219700    2.885300   -1.119200
C      -1.066200    3.616300   -1.911800
C      -3.478600    4.171900   -0.650800
H      -3.977600    2.121900   -0.986200
C      -1.319700    4.902000   -1.432700
H      -0.123300    3.431400   -2.406500
C      -2.526500    5.184500   -0.792700
H      -4.430700    4.377000   -0.173600
H      -0.566700    5.672700   -1.557400
H      -2.727400    6.182400   -0.418300
C      -2.893900    0.610900   -3.076100
H      -3.853300    0.671500   -2.561500
H      -2.962300    1.191200   -4.005200
H      -2.713200   -0.437500   -3.330900
Al      4.164600   -0.290600   -1.893100
C       5.760300   -1.395900   -2.265800
H       5.531200   -2.405100   -2.626500
H       6.306300   -0.877300   -3.067500
H       6.454700   -1.466200   -1.419400
C       2.688900   -0.302200   -3.198400
H       2.455700    0.688400   -3.605300
H       2.962500   -0.948400   -4.042600
H       1.775500   -0.709000   -2.747200
Cl      4.884200    1.600000   -1.013900
103
2LA-TS1-2 Molecule Name
P       0.543400    1.572000    0.162600
P      -1.637200   -1.327900    0.249400
O      -2.611900    1.654800   -0.312800
C      -0.587700    3.034300   -0.006200
C      -0.053800    4.334200    0.071300
H       1.013400    4.453200    0.210300
C      -0.855000    5.466700   -0.041500
H      -0.404100    6.449900    0.020900
C      -2.227600    5.333100   -0.246200
H      -2.859000    6.206800   -0.354200
C      -2.786300    4.061900   -0.326200
H      -3.843000    3.935500   -0.522600
C      -1.967000    2.942900   -0.196200
C      -3.106100    1.057700    0.911000
C      -2.738600   -0.244300    1.278300
C      -3.251900   -0.712100    2.503100
H      -2.963000   -1.699000    2.843700
C      -4.080700    0.062400    3.307800
H      -4.445500   -0.335900    4.247100
C      -4.437900    1.345100    2.897600
H      -5.090100    1.959600    3.506600
C      -3.951200    1.841700    1.692300
H      -4.218900    2.839100    1.373700
C       0.681600    1.453900    1.994100
C       1.778000    0.763400    2.537300
H       2.546400    0.362600    1.887500
C       1.886400    0.584300    3.915100
H       2.752700    0.069300    4.314700
C       0.886900    1.057500    4.768000
H       0.969200    0.909200    5.839200
C      -0.214400    1.729900    4.235400
H      -0.995100    2.103300    4.889200
C      -0.310400    1.939900    2.858500
H      -1.162000    2.485800    2.469400
C       2.146800    2.278400   -0.380000
C       3.083200    2.870100    0.477900
H       2.873600    2.964800    1.537700
C       4.310500    3.309000   -0.022100
H       5.042500    3.735500    0.654300
C       4.608100    3.166400   -1.376700
H       5.576400    3.471700   -1.754900
C       3.670700    2.596900   -2.239900
H       3.906400    2.461700   -3.288800
C       2.447800    2.153000   -1.744900
H       1.735700    1.675600   -2.410700
C      -2.834200   -2.496200   -0.533800
C      -3.771100   -3.231900    0.210400
H      -3.825700   -3.115000    1.286700
C      -4.635600   -4.122600   -0.421100
H      -5.356600   -4.681100    0.165500
C      -4.569400   -4.300900   -1.806000
H      -5.241100   -4.997000   -2.296100
C      -3.639700   -3.581100   -2.553700
H      -3.583800   -3.710700   -3.628700
C      -2.779100   -2.680800   -1.921400
H      -2.089100   -2.097000   -2.518700
C      -0.828700   -2.412500    1.499100
C      -0.579000   -3.758200    1.183300
H      -0.997700   -4.193500    0.282200
C       0.212100   -4.545600    2.019900
H       0.402700   -5.580600    1.759100
C       0.760600   -4.004000    3.183200
H       1.383100   -4.615000    3.827100
C       0.510300   -2.670300    3.508000
H       0.936600   -2.233800    4.404200
C      -0.273900   -1.877900    2.671600
H      -0.443600   -0.839900    2.932900
C       1.867900   -0.974300   -0.604300
N       2.959600   -1.105500   -0.160400
Ni      0.192100   -0.408600   -0.828600
Al      4.817600   -1.292500    0.421600
Cl      5.856600   -0.455700   -1.389400
C       5.131100   -0.120300    1.995600
H       4.616300   -0.492100    2.893100
H       6.206400   -0.108000    2.219500
H       4.824200    0.917500    1.817000
C       5.104600   -3.241600    0.652400
H       5.025000   -3.780900   -0.299000
H       6.096500   -3.451300    1.073500
H       4.353300   -3.657600    1.339200
C       1.892800   -2.299100   -2.989300
C       0.890300   -2.127600   -1.824300
H       1.319900   -2.872100   -3.737900
H       0.834500   -3.013700   -1.187200
H      -0.093800   -1.940300   -2.267400
C       3.129500   -3.136300   -2.637900
H       3.635000   -3.454200   -3.556600
H       3.849800   -2.559800   -2.055400
H       2.858900   -4.033100   -2.068800
C       2.293300   -0.969400   -3.643100
H       2.836200   -1.156400   -4.575800
H       1.413500   -0.357200   -3.872700
H       2.958500   -0.405900   -2.980100
Al     -3.250700    1.213100   -2.196900
Cl     -1.269800    0.472600   -2.979800
C      -4.742200   -0.026300   -1.856800
H      -5.670600    0.561800   -1.869600
H      -4.822300   -0.785300   -2.643600
H      -4.696900   -0.560800   -0.903600
C      -3.611200    2.902200   -3.148500
H      -4.507900    3.420100   -2.784700
H      -2.768900    3.601300   -3.118200
H      -3.787800    2.655700   -4.204900
103
2LA-TS2-3 Molecule Name
P       0.667200    1.669700    0.065900
P      -0.787900   -1.599600    0.181100
O      -2.574000    1.092800    0.293600
C      -0.773300    2.821600   -0.122700
C      -0.533800    4.137900   -0.564200
H       0.488200    4.476100   -0.658100
C      -1.551800    5.010400   -0.936800
H      -1.305600    6.007600   -1.282100
C      -2.871700    4.583400   -0.876100
H      -3.685800    5.234900   -1.169900
C      -3.151400    3.293300   -0.436000
H      -4.176300    2.964600   -0.399000
C      -2.127400    2.425700   -0.069900
C      -2.208900    0.522300    1.560300
C      -1.529100   -0.702500    1.637000
C      -1.440700   -1.269100    2.922400
H      -0.956600   -2.229300    3.041500
C      -1.949400   -0.634500    4.053100
H      -1.850600   -1.109800    5.021600
C      -2.581800    0.600500    3.935700
H      -2.978300    1.105100    4.808400
C      -2.723100    1.172600    2.676400
H      -3.240200    2.116000    2.544700
C       0.978600    1.585500    1.883000
C       2.093900    0.824300    2.270400
H       2.671800    0.286600    1.524400
C       2.484400    0.770200    3.606100
H       3.360700    0.192400    3.880100
C       1.760100    1.469600    4.575300
H       2.061400    1.427000    5.616200
C       0.660600    2.239300    4.195900
H       0.104500    2.798800    4.940700
C       0.278600    2.308200    2.853800
H      -0.558400    2.934900    2.565900
C       2.171700    2.678900   -0.317500
C       2.499200    3.835100    0.418300
H       1.822600    4.199500    1.185100
C       3.703800    4.496100    0.201800
H       3.939600    5.386500    0.774700
C       4.621600    3.995100   -0.727800
H       5.570400    4.497700   -0.879200
C       4.330600    2.829400   -1.430600
H       5.053500    2.389300   -2.107100
C       3.109400    2.177700   -1.229200
H       2.934800    1.244400   -1.746700
C      -2.105900   -2.768300   -0.327600
C      -2.512400   -3.825300    0.503700
H      -2.054900   -3.959700    1.478000
C      -3.491900   -4.715600    0.074200
H      -3.800000   -5.530100    0.720200
C      -4.080700   -4.558200   -1.185400
H      -4.844700   -5.253200   -1.515700
C      -3.687000   -3.507100   -2.011800
H      -4.148200   -3.366900   -2.982400
C      -2.698700   -2.618500   -1.582900
H      -2.398800   -1.795100   -2.214300
C       0.455000   -2.740800    0.926600
C       0.715900   -3.949000    0.259000
H       0.087300   -4.262900   -0.567200
C       1.798200   -4.743300    0.631600
H       1.996200   -5.665000    0.096500
C       2.635400   -4.347200    1.675600
H       3.484600   -4.960200    1.955000
C       2.383800   -3.150000    2.344400
H       3.035800   -2.825100    3.147700
C       1.305800   -2.349900    1.968500
H       1.150300   -1.408700    2.478500
H      -1.181700    0.067600   -1.649300
C       1.934100   -1.068900   -1.101200
N       3.040000   -1.410500   -0.909300
Ni      0.208600   -0.360700   -1.366400
Al      4.957200   -1.661400   -0.574600
Cl      5.758800   -0.419000   -2.279100
C       5.251800   -0.753100    1.168400
H       4.605700   -1.189000    1.944500
H       6.291600   -0.854400    1.504200
H       5.032300    0.320200    1.094200
C       5.365900   -3.579800   -0.835600
H       6.442900   -3.742000   -0.969100
H       5.036800   -4.180300    0.022300
H       4.859800   -3.963000   -1.730600
C      -0.508500    0.410300   -3.447800
C       0.842700    0.121200   -3.312400
H       1.555200    0.928200   -3.183800
H       1.241600   -0.814400   -3.691600
C      -1.417000   -0.562100   -4.168100
H      -2.452000   -0.472800   -3.830900
H      -1.397800   -0.314200   -5.237600
H      -1.076600   -1.594200   -4.053700
C      -0.991800    1.845000   -3.419300
H      -1.984900    1.928600   -2.971500
H      -0.299200    2.492000   -2.877100
H      -1.059900    2.206500   -4.453800
Al     -4.615500    0.407200   -0.062900
Cl     -4.473000    0.473200   -2.273500
C      -4.852700   -1.334500    0.822600
H      -5.822200   -1.277200    1.337100
H      -4.899000   -2.166800    0.115200
H      -4.098400   -1.576300    1.576500
C      -5.812900    1.806000    0.688600
H      -6.673400    1.275300    1.117900
H      -5.372200    2.401900    1.498200
H      -6.207600    2.499300   -0.064300
110
2LA-TS5-6 Molecule Name
P       1.404300   -1.460800    0.625500
P      -1.265800    0.875600   -0.817300
O      -0.932800   -2.377300   -1.301500
C       1.001000   -3.169800    0.037700
C       1.810600   -4.266000    0.389800
H       2.584700   -4.127000    1.133900
C       1.654100   -5.519000   -0.193100
H       2.296700   -6.337400    0.109500
C       0.685600   -5.708100   -1.176600
H       0.559600   -6.671900   -1.654600
C      -0.133600   -4.645500   -1.542100
H      -0.901400   -4.786600   -2.289100
C       0.014100   -3.406000   -0.922300
C      -0.575900   -1.497100   -2.397600
C      -0.781400   -0.104000   -2.332500
C      -0.523000    0.606900   -3.521800
H      -0.686600    1.676000   -3.535400
C      -0.028200    0.000400   -4.672400
H       0.169600    0.600400   -5.552400
C       0.218900   -1.367700   -4.675300
H       0.622400   -1.858800   -5.552400
C      -0.075000   -2.114900   -3.539400
H       0.094700   -3.182200   -3.545600
C       2.818800   -1.174500   -0.534000
C       2.641900   -0.306200   -1.616300
H       1.715700    0.241900   -1.720100
C       3.654900   -0.118100   -2.556700
H       3.510200    0.588800   -3.363600
C       4.864700   -0.794500   -2.418500
H       5.661300   -0.632200   -3.135600
C       5.056800   -1.662600   -1.340400
H       6.002300   -2.179800   -1.220000
C       4.041900   -1.853600   -0.406000
H       4.212600   -2.518100    0.433800
C       2.259500   -1.754800    2.225600
C       3.305900   -0.892300    2.596600
H       3.682900   -0.156700    1.893600
C       3.866300   -0.970900    3.871400
H       4.674700   -0.299600    4.139100
C       3.390400   -1.904800    4.794300
H       3.829200   -1.964700    5.784000
C       2.347300   -2.760500    4.437100
H       1.969700   -3.486600    5.148700
C       1.781400   -2.683600    3.163400
H       0.964100   -3.349300    2.902300
C      -3.102100    0.871000   -0.903500
C      -3.743700    1.308500   -2.076300
H      -3.158600    1.570400   -2.951600
C      -5.128500    1.422700   -2.121700
H      -5.612000    1.762000   -3.030900
C      -5.894600    1.095200   -0.997200
H      -6.974800    1.186000   -1.033100
C      -5.267200    0.652100    0.164600
H      -5.847500    0.392600    1.042100
C      -3.874600    0.544400    0.211300
H      -3.399700    0.197000    1.115700
C      -0.933900    2.642800   -1.271800
C      -1.893600    3.620500   -0.957000
H      -2.862200    3.331800   -0.568800
C      -1.611600    4.976400   -1.127700
H      -2.367100    5.713200   -0.876200
C      -0.371200    5.380900   -1.619800
H      -0.152100    6.434600   -1.751500
C       0.591500    4.421200   -1.934500
H       1.572400    4.707600   -2.296100
C       0.315800    3.066700   -1.754600
H       1.104000    2.357800   -1.981000
H      -1.255300   -0.323600    1.470200
C       1.401700    1.592700    0.726300
N       2.372400    2.229800    0.554300
Ni     -0.061500    0.463300    1.053100
Al      4.061000    3.149600    0.146300
C       3.887300    4.939600    0.970200
H       2.977400    5.436000    0.608500
H       3.820400    4.870300    2.064500
H       4.738900    5.586600    0.725100
C       5.432900    1.823000    0.682500
H       5.417900    1.656800    1.769700
H       5.252900    0.861600    0.183200
H       6.445000    2.149200    0.412400
Cl      3.961400    3.326100   -2.109700
C      -1.075500    0.435800    3.066900
C       0.224400    0.970500    3.040300
H       1.054000    0.368500    3.398600
H       0.378100    2.042500    3.070500
C      -1.274900   -0.905700    3.753100
H      -2.125100   -1.459900    3.355700
H      -0.382500   -1.519400    3.635400
H      -1.427700   -0.733300    4.825500
C      -2.248800    1.377100    3.033000
C      -3.452500    1.038500    3.665500
C      -2.167900    2.613900    2.371900
C      -4.543600    1.909900    3.638600
H      -3.554000    0.087700    4.174000
C      -3.253600    3.483700    2.349700
H      -1.263400    2.885600    1.837200
C      -4.449600    3.134800    2.981200
H      -5.466500    1.626200    4.133000
H      -3.165700    4.430400    1.827500
H      -5.297800    3.809800    2.956400
Al     -2.944300   -2.994900   -1.000100
C      -3.919900   -1.973200   -2.368800
H      -4.362700   -2.707800   -3.055400
H      -4.736900   -1.386800   -1.935200
H      -3.306700   -1.289200   -2.962400
C      -3.169600   -4.956800   -1.144300
H      -3.059800   -5.345500   -2.165200
H      -2.526000   -5.533900   -0.473000
H      -4.209600   -5.151300   -0.841500
Cl     -3.012600   -2.554300    1.172400
110
2LA-TS7-8 Molecule Name
P      -0.218200    1.882000    0.011400
P      -1.405300   -1.733300    0.274000
O      -3.230300    0.882900   -0.241300
C      -1.780400    2.875000   -0.138100
C      -1.712300    4.281600   -0.121700
H      -0.739100    4.755100   -0.073200
C      -2.854300    5.072800   -0.173600
H      -2.761400    6.152400   -0.161400
C      -4.113800    4.475400   -0.250200
H      -5.010000    5.081000   -0.310500
C      -4.213900    3.089500   -0.260600
H      -5.177200    2.605000   -0.360500
C      -3.055400    2.317100   -0.189800
C      -3.431700    0.198100    1.024600
C      -2.712500   -0.964100    1.348500
C      -2.972000   -1.525500    2.614700
H      -2.415400   -2.407300    2.910200
C      -3.885600   -0.970100    3.504800
H      -4.044100   -1.430600    4.472600
C      -4.583300    0.179300    3.144200
H      -5.297100    0.630300    3.822900
C      -4.356900    0.760800    1.900100
H      -4.887000    1.662400    1.630600
C       0.138900    2.258600    1.775700
C      -0.382300    1.383600    2.737600
H      -0.904900    0.487500    2.428700
C      -0.229200    1.646400    4.096600
H      -0.618600    0.944200    4.824700
C       0.450800    2.789500    4.511600
H       0.596300    2.982800    5.568200
C       0.963900    3.674000    3.562700
H       1.501900    4.560000    3.880500
C       0.803700    3.417300    2.202500
H       1.209200    4.116400    1.480100
C       0.958300    2.887100   -0.978000
C       2.308000    2.977900   -0.598900
H       2.645100    2.558700    0.341700
C       3.239200    3.577500   -1.447600
H       4.275900    3.635800   -1.135100
C       2.839100    4.081100   -2.686300
H       3.565500    4.540800   -3.347400
C       1.502600    3.978500   -3.077800
H       1.187800    4.352800   -4.045700
C       0.567600    3.381900   -2.232800
H      -0.461600    3.282300   -2.562200
C      -2.361300   -3.060500   -0.578300
C      -3.455100   -3.716700    0.007900
H      -3.805400   -3.418900    0.990200
C      -4.111700   -4.744200   -0.666600
H      -4.959500   -5.236500   -0.203100
C      -3.685000   -5.132600   -1.938400
H      -4.198700   -5.929800   -2.464300
C      -2.598300   -4.489200   -2.530900
H      -2.263500   -4.781100   -3.520100
C      -1.941600   -3.459400   -1.854900
H      -1.109800   -2.957500   -2.332700
C      -0.408800   -2.700400    1.492200
C      -0.547800   -4.087100    1.668700
H      -1.284000   -4.642000    1.099400
C       0.271000   -4.769400    2.570600
H       0.156000   -5.841400    2.690400
C       1.233900   -4.080000    3.308700
H       1.873000   -4.614200    4.003200
C       1.384000   -2.702600    3.139200
H       2.136600   -2.144300    3.685300
C       0.574800   -2.020300    2.232000
H       0.741800   -0.958600    2.098800
C       1.736100   -0.293500   -0.300200
N       2.735600   -0.182200    0.324500
Ni      0.028600   -0.209600   -0.781700
Al      4.245000   -0.041300    1.548800
C       5.003100   -1.859100    1.711800
H       4.219800   -2.566000    2.015800
H       5.414600   -2.203600    0.755600
H       5.800700   -1.899700    2.464900
C       5.277300    1.562200    0.984400
H       5.327400    1.637600   -0.109300
H       4.819900    2.480700    1.376200
H       6.306200    1.521800    1.365400
Cl      3.143000    0.463700    3.470300
C       2.394000   -1.090300   -2.844000
C       1.340400   -1.502400   -1.787300
H       2.195600   -1.768100   -3.691300
H       1.606000   -2.414000   -1.247600
H       0.390000   -1.657100   -2.310400
C       2.161700    0.335000   -3.357200
H       2.850500    0.570500   -4.174900
H       1.136200    0.446700   -3.721800
H       2.308400    1.071900   -2.563000
C       3.831100   -1.377000   -2.427200
C       4.759300   -0.366600   -2.155200
C       4.258300   -2.710400   -2.348200
C       6.077800   -0.679400   -1.817900
H       4.453000    0.672900   -2.190700
C       5.573200   -3.027800   -2.014400
H       3.550900   -3.508100   -2.561700
C       6.491600   -2.009200   -1.752000
H       6.776900    0.119100   -1.593800
H       5.881000   -4.066600   -1.957600
H       7.515200   -2.250100   -1.487400
Al     -3.700400    0.268400   -2.132000
Cl     -1.571700    0.058600   -2.866400
C      -4.850700   -1.299000   -1.848700
H      -5.837800   -1.065300   -2.270000
H      -4.479100   -2.200100   -2.347100
H      -4.987800   -1.545900   -0.790400
C      -4.410500    1.821300   -3.120000
H      -5.410800    2.125700   -2.787800
H      -3.752500    2.695900   -3.078400
H      -4.494700    1.528800   -4.176400
110
2LA-TS9-10 Molecule Name
P      -1.295100    1.461500   -0.891800
P       0.397500   -1.971200   -0.024100
O      -1.799900   -0.326500    1.682500
C      -1.856300    1.976700    0.800700
C      -2.201800    3.320800    1.043500
H      -2.050500    4.051500    0.260900
C      -2.738500    3.743600    2.255500
H      -2.975600    4.790500    2.401000
C      -2.992200    2.814200    3.259200
H      -3.449400    3.115700    4.193500
C      -2.673900    1.478700    3.046100
H      -2.948900    0.740200    3.785800
C      -2.072400    1.080900    1.852800
C      -0.717400   -0.936900    2.433900
C       0.121100   -1.871100    1.805400
C       0.950400   -2.637700    2.647500
H       1.585400   -3.393700    2.204900
C       1.025300   -2.422900    4.018900
H       1.683500   -3.031700    4.626700
C       0.279100   -1.396400    4.585800
H       0.359500   -1.168500    5.641900
C      -0.604600   -0.667800    3.795000
H      -1.191200    0.106100    4.259400
C      -0.854300    3.097500   -1.614200
C       0.149600    3.859800   -0.990700
H       0.606900    3.528900   -0.064000
C       0.589500    5.052100   -1.557600
H       1.366900    5.615500   -1.053900
C       0.044500    5.493500   -2.766700
H       0.394200    6.416500   -3.216000
C      -0.951500    4.744100   -3.393100
H      -1.383300    5.085500   -4.327800
C      -1.406800    3.553700   -2.818200
H      -2.189600    2.986900   -3.310500
C      -2.886200    1.059800   -1.718400
C      -2.880500    0.132400   -2.767500
H      -1.959900   -0.379000   -3.024400
C      -4.054000   -0.169700   -3.456200
H      -4.036200   -0.902500   -4.254800
C      -5.252400    0.441500   -3.091500
H      -6.170600    0.192000   -3.611500
C      -5.271600    1.364200   -2.044200
H      -6.202600    1.836300   -1.751000
C      -4.095200    1.679100   -1.366700
H      -4.123400    2.402500   -0.559500
C      -0.630300   -3.366200   -0.613800
C      -1.003300   -4.420100    0.230800
H      -0.732800   -4.398700    1.280500
C      -1.734500   -5.496600   -0.267800
H      -2.035900   -6.296100    0.399600
C      -2.083200   -5.540700   -1.618200
H      -2.656900   -6.376100   -2.003600
C      -1.702200   -4.503100   -2.469100
H      -1.979400   -4.528200   -3.517100
C      -0.985900   -3.418400   -1.967000
H      -0.722300   -2.598200   -2.625800
C       2.087800   -2.722100   -0.069600
C       2.342000   -3.949600   -0.694000
H       1.538300   -4.495700   -1.174100
C       3.629600   -4.495700   -0.682500
H       3.809800   -5.448100   -1.169300
C       4.666200   -3.833500   -0.030400
H       5.660600   -4.266000   -0.007000
C       4.423000   -2.602600    0.585600
H       5.227400   -2.067900    1.076300
C       3.152700   -2.039800    0.547900
H       2.988500   -1.076400    1.017300
C       1.372800    0.897900    0.348000
N       1.814400    1.451800    1.283700
Ni      0.519100    0.049300   -1.054800
H      -0.126100   -0.618100   -2.197600
C       4.116400    1.666100    3.370600
H       4.763000    1.386800    2.528000
H       4.711100    2.283600    4.054900
H       3.838500    0.745100    3.901800
C       0.910500    2.965400    3.827300
H       0.077300    3.309200    3.200100
H       0.589400    2.049300    4.342800
H       1.095300    3.734100    4.587700
Cl      3.027500    4.368700    1.396500
Al      2.505000    2.603900    2.707100
C       1.203200   -0.319100   -3.102600
C       2.132300    0.555500   -2.518100
H       1.443300   -1.374800   -3.197400
H       0.543400    0.074300   -3.873000
C       3.480700    0.086800   -2.062400
C       4.235700    0.860100   -1.164000
C       4.084900   -1.042100   -2.637200
C       5.548900    0.514900   -0.853600
H       3.799600    1.736200   -0.697800
C       5.401300   -1.383100   -2.331400
H       3.540500   -1.645100   -3.355500
C       6.140900   -0.603900   -1.442700
H       6.109500    1.129200   -0.157500
H       5.847800   -2.257500   -2.792100
H       7.168500   -0.863600   -1.212200
C       2.071500    2.029400   -2.871700
H       2.297900    2.671500   -2.019600
H       2.823500    2.236000   -3.644500
H       1.089200    2.314300   -3.253200
Al     -3.630300   -1.486900    1.598900
Cl     -3.791500   -2.245200   -0.457600
C      -3.179800   -2.845000    2.957000
H      -3.074400   -2.402800    3.956200
H      -3.988600   -3.586100    3.003000
H      -2.253700   -3.384800    2.734100
C      -5.058200   -0.148400    1.868800
H      -5.996900   -0.610900    1.534400
H      -5.189400    0.159800    2.912500
H      -4.911900    0.751700    1.261600
85
L1-1 Molecule Name
P       1.486900    0.571800   -0.057600
P      -1.843200   -0.561900   -0.206600
C       1.504600    2.379300   -0.583600
C       2.733000    3.061000   -0.531300
H       3.615500    2.538600   -0.186400
C       2.861300    4.396100   -0.910700
H       3.829600    4.880000   -0.849200
C       1.748600    5.092200   -1.366900
H       1.831600    6.126900   -1.679200
C       0.515200    4.448500   -1.417100
H      -0.357200    4.984100   -1.764700
C       0.376100    3.113500   -1.023600
C      -1.593000    2.244000    0.340500
C      -2.015000    0.983300    0.810500
C      -2.459700    0.904000    2.142000
H      -2.753700   -0.055900    2.545000
C      -2.520500    2.023400    2.966500
H      -2.860300    1.916100    3.990400
C      -2.141800    3.270100    2.474700
H      -2.193200    4.152400    3.102400
C      -1.677300    3.370100    1.170000
H      -1.360200    4.333800    0.786600
C       1.219200    0.703700    1.763700
C       0.954500   -0.495700    2.445800
H       0.933700   -1.427800    1.889900
C       0.708300   -0.496900    3.816600
H       0.498600   -1.431800    4.324700
C       0.716600    0.706200    4.526100
H       0.515300    0.710800    5.592000
C       0.979100    1.902300    3.858700
H       0.978900    2.840500    4.403100
C       1.233700    1.902800    2.485500
H       1.425000    2.841100    1.977400
C       3.294700    0.202100   -0.159500
C       4.119600    0.033500    0.959300
H       3.716500    0.170900    1.956300
C       5.462600   -0.321300    0.799300
H       6.087600   -0.461200    1.674700
C       5.998000   -0.489800   -0.476500
H       7.040300   -0.762900   -0.599100
C       5.184500   -0.308400   -1.599600
H       5.594800   -0.439500   -2.595300
C       3.841900    0.023200   -1.441200
H       3.202900    0.133400   -2.312700
C      -3.192700   -0.421700   -1.446300
C      -4.209100    0.539900   -1.389900
H      -4.216500    1.280600   -0.597000
C      -5.208700    0.562500   -2.364100
H      -5.987800    1.316000   -2.317900
C      -5.202100   -0.376700   -3.395800
H      -5.978900   -0.357700   -4.152800
C      -4.189200   -1.336700   -3.456300
H      -4.176500   -2.064700   -4.260300
C      -3.183500   -1.359300   -2.490800
H      -2.383900   -2.093000   -2.543000
C      -2.535400   -1.871400    0.893100
C      -3.896900   -1.940200    1.232000
H      -4.586400   -1.199100    0.840500
C      -4.369900   -2.958600    2.057500
H      -5.423800   -3.002500    2.310400
C      -3.490800   -3.928600    2.547800
H      -3.861300   -4.723400    3.186600
C      -2.141200   -3.882600    2.199600
H      -1.458400   -4.646200    2.556200
C      -1.668500   -2.861700    1.372900
H      -0.629100   -2.848400    1.064500
C       3.256500   -3.395300   -0.689200
C       2.494800   -3.059200   -1.992600
H       3.393400   -2.457300   -0.137800
H       2.356100   -3.978200   -2.579600
H       3.102400   -2.370300   -2.588300
C       4.639600   -3.968600   -1.025000
H       5.213800   -4.154300   -0.110600
H       4.544400   -4.919500   -1.564900
H       5.213200   -3.274000   -1.648100
C       2.457000   -4.362900    0.193500
H       2.995100   -4.571800    1.125000
H       1.476100   -3.947000    0.446000
H       2.291600   -5.315200   -0.326200
C       1.165600   -2.447400   -1.725100
N      -0.034900   -2.716600   -1.796500
Ni      0.225300   -0.989200   -0.917200
C      -1.029300    2.539300   -1.036000
F      -1.906300    3.475300   -1.648400
F      -1.070500    1.428700   -1.901100
85
L1-2 Molecule Name
P       1.832400   -0.047900   -0.103800
P      -1.982700    0.018000   -0.135700
C       2.438500    1.705400   -0.315200
C       3.796200    1.958900   -0.562200
H       4.483900    1.127400   -0.659200
C       4.284700    3.258900   -0.693300
H       5.340200    3.419100   -0.882900
C       3.415800    4.340000   -0.584700
H       3.782500    5.354400   -0.691800
C       2.060900    4.112900   -0.352200
H       1.372800    4.944700   -0.286400
C       1.569100    2.813100   -0.217800
C      -0.346700    1.937400    1.267400
C      -1.342100    0.937500    1.356500
C      -1.749000    0.549700    2.643700
H      -2.533200   -0.186500    2.754900
C      -1.166200    1.076200    3.794700
H      -1.504300    0.737800    4.767800
C      -0.149600    2.019200    3.689600
H       0.331800    2.418000    4.574400
C       0.237200    2.455300    2.427900
H       1.012700    3.207500    2.333300
C       2.153300   -0.309600    1.697900
C       1.327900   -1.228300    2.360800
H       0.553200   -1.740500    1.799800
C       1.477200   -1.473700    3.725700
H       0.825200   -2.184700    4.221600
C       2.453600   -0.791200    4.451200
H       2.569500   -0.973100    5.514200
C       3.280000    0.131100    3.804900
H       4.039400    0.665800    4.365400
C       3.132500    0.369800    2.438900
H       3.773600    1.095300    1.950100
C       3.209300   -0.963600   -0.913300
C       4.171000   -1.711300   -0.220200
H       4.157300   -1.743100    0.864100
C       5.151000   -2.421300   -0.919200
H       5.886600   -3.000800   -0.371600
C       5.185800   -2.382300   -2.313000
H       5.948300   -2.932200   -2.853900
C       4.231600   -1.636900   -3.011300
H       4.247200   -1.607000   -4.095100
C       3.243900   -0.938100   -2.320000
H       2.486100   -0.388000   -2.871500
C      -3.116700    1.218700   -0.930500
C      -3.872800    2.114100   -0.158700
H      -3.766100    2.123400    0.921400
C      -4.756700    2.997600   -0.775000
H      -5.334700    3.690000   -0.172700
C      -4.891300    2.993400   -2.165700
H      -5.575800    3.684700   -2.645700
C      -4.135900    2.109800   -2.936700
H      -4.222800    2.115800   -4.017300
C      -3.247300    1.223900   -2.324500
H      -2.632100    0.569100   -2.930700
C      -3.175100   -1.201400    0.594800
C      -4.534000   -1.205400    0.248700
H      -4.929200   -0.435200   -0.402500
C      -5.390000   -2.199500    0.729900
H      -6.436000   -2.186400    0.444000
C      -4.908100   -3.198200    1.573800
H      -5.575700   -3.965900    1.948900
C      -3.557300   -3.206100    1.929400
H      -3.169400   -3.980100    2.583200
C      -2.701100   -2.226000    1.434300
H      -1.651400   -2.255200    1.711500
C      -0.111500   -3.355500   -0.822400
C       0.301800   -2.774500   -2.134800
H      -0.271000   -3.083200   -3.006900
H       1.370900   -2.703700   -2.327900
C       1.034200   -3.962100    0.000500
H       0.713300   -4.193100    1.023100
H       1.365400   -4.892700   -0.472300
H       1.890200   -3.283600    0.047900
C      -1.334500   -4.278800   -0.905900
H      -1.681100   -4.577700    0.088100
H      -2.163600   -3.783100   -1.419500
H      -1.068300   -5.182900   -1.464500
C      -0.285500   -0.375400   -2.987500
N      -0.156700    0.132800   -4.044000
Ni     -0.418600   -1.188700   -1.337400
C       0.083000    2.624100   -0.009500
F      -0.554800    3.893100   -0.016400
F      -0.433000    1.966500   -1.142800
H      -0.475500   -2.455900   -0.142400
85
L1-3 Molecule Name
P       1.841900   -0.297100   -0.051800
P      -1.921300    0.068100    0.014300
C       2.483700    1.270900   -0.830100
C       3.821000    1.297500   -1.257900
H       4.427300    0.406600   -1.159100
C       4.397800    2.440000   -1.809800
H       5.433100    2.416500   -2.130600
C       3.639300    3.596200   -1.944000
H       4.068300    4.492900   -2.376000
C       2.311300    3.596000   -1.525900
H       1.713200    4.489100   -1.636400
C       1.723200    2.455600   -0.969700
C      -0.161800    2.218200    0.816200
C      -1.224700    1.357200    1.174800
C      -1.631500    1.373200    2.519600
H      -2.472400    0.767100    2.827400
C      -0.976500    2.134700    3.484900
H      -1.319300    2.104100    4.513200
C       0.118000    2.915800    3.128700
H       0.659500    3.487500    3.872800
C       0.498400    2.969700    1.793800
H       1.322500    3.608200    1.493800
C       2.208800    0.037100    1.732100
C       1.460600   -0.610100    2.723700
H       0.670600   -1.290500    2.428100
C       1.716600   -0.382400    4.076400
H       1.120900   -0.889100    4.827900
C       2.726300    0.499800    4.458500
H       2.921900    0.683200    5.509500
C       3.485100    1.145300    3.480000
H       4.275300    1.830400    3.767900
C       3.231600    0.914300    2.129000
H       3.826700    1.428200    1.383000
C       3.136900   -1.522400   -0.512700
C       3.933700   -2.173100    0.437800
H       3.850900   -1.916600    1.487900
C       4.841200   -3.159100    0.040100
H       5.450100   -3.658500    0.786100
C       4.968000   -3.495100   -1.306700
H       5.676100   -4.257300   -1.613500
C       4.177500   -2.847800   -2.261000
H       4.268300   -3.104500   -3.310600
C       3.261900   -1.874300   -1.869800
H       2.635300   -1.389800   -2.613200
C      -3.072500    0.982700   -1.082000
C      -3.910300    1.990300   -0.581100
H      -3.864100    2.260500    0.469300
C      -4.799400    2.647900   -1.429000
H      -5.441200    3.429800   -1.037700
C      -4.858000    2.303300   -2.782300
H      -5.546600    2.819200   -3.442800
C      -4.020600    1.307600   -3.285700
H      -4.047400    1.052800   -4.339200
C      -3.125900    0.648800   -2.440200
H      -2.438600   -0.087800   -2.841800
C      -3.106800   -0.882700    1.072400
C      -4.441600   -1.069600    0.684100
H      -4.826900   -0.571900   -0.197500
C      -5.289400   -1.903100    1.419700
H      -6.315200   -2.039800    1.095300
C      -4.824800   -2.549800    2.563000
H      -5.485500   -3.191300    3.135700
C      -3.498100   -2.370600    2.963200
H      -3.121400   -2.875900    3.845900
C      -2.648100   -1.559900    2.217100
H      -1.610700   -1.460700    2.516300
H      -0.269600   -1.513200    0.748900
C       0.054000   -0.717200   -2.514600
N       0.237300   -0.532900   -3.665100
Ni     -0.167800   -1.170700   -0.676900
C       0.254100    2.556600   -0.598100
F      -0.163000    3.908200   -0.787800
F      -0.499300    1.843100   -1.540000
C      -1.035300   -3.390300   -1.085400
C       0.328800   -3.303300   -1.130500
H       0.848100   -3.149100   -2.068800
H       0.934400   -3.598100   -0.278200
C      -1.744600   -3.946200    0.126600
H      -2.702300   -3.449200    0.297300
H      -1.955200   -5.011100   -0.044800
H      -1.139700   -3.853900    1.031700
C      -1.900100   -3.252400   -2.317200
H      -2.758100   -2.600900   -2.114500
H      -1.347200   -2.840200   -3.162300
H      -2.298200   -4.238100   -2.595200
73
L1-4 Molecule Name
P      -1.879700    0.145000   -0.487700
P       2.102900    0.125800   -0.473600
C      -2.279200   -1.367400    0.524300
C      -3.579200   -1.884500    0.413900
H      -4.269200   -1.439000   -0.291600
C      -4.015700   -2.958400    1.188400
H      -5.026600   -3.331200    1.069000
C      -3.148300   -3.538400    2.104500
H      -3.467800   -4.372400    2.718600
C      -1.847400   -3.054600    2.219500
H      -1.164200   -3.525000    2.911500
C      -1.391000   -1.983700    1.443300
C       0.510700   -0.228300    1.923100
C       1.527100    0.504100    1.263800
C       1.917900    1.726500    1.833600
H       2.687800    2.314700    1.350100
C       1.321600    2.224100    2.990400
H       1.649400    3.175200    3.395000
C       0.299600    1.510500    3.609300
H      -0.192500    1.899600    4.492500
C      -0.086500    0.285400    3.078700
H      -0.870500   -0.287800    3.562100
C      -2.222700    1.475000    0.751100
C      -1.579200    2.714700    0.645300
H      -0.859200    2.878300   -0.148200
C      -1.833100    3.730300    1.567700
H      -1.319800    4.680700    1.472400
C      -2.733300    3.520000    2.611800
H      -2.925700    4.306500    3.333500
C      -3.386300    2.291100    2.724000
H      -4.091200    2.119800    3.530300
C      -3.137200    1.277600    1.799300
H      -3.649300    0.327900    1.903300
C      -3.281400    0.285100   -1.667500
C      -4.332700    1.196300   -1.490800
H      -4.355100    1.842900   -0.621100
C      -5.354200    1.281100   -2.438500
H      -6.159000    1.994400   -2.297100
C      -5.338700    0.454500   -3.562300
H      -6.133300    0.521600   -4.297500
C      -4.294400   -0.455500   -3.742800
H      -4.273200   -1.097400   -4.616200
C      -3.264000   -0.538100   -2.807600
H      -2.446900   -1.235900   -2.962700
C       3.258000   -1.284500   -0.350300
C       3.997500   -1.540500    0.813200
H       3.871400   -0.909500    1.687900
C       4.878100   -2.620800    0.857400
H       5.442000   -2.819600    1.762200
C       5.020300   -3.452000   -0.255900
H       5.701400   -4.295400   -0.218400
C       4.272900   -3.209100   -1.409200
H       4.360400   -3.868300   -2.265300
C       3.388300   -2.131400   -1.458000
H       2.768200   -1.976800   -2.334600
C       3.205100    1.536000   -0.901600
C       4.567600    1.558200   -0.562900
H       5.011300    0.718200   -0.040700
C       5.363300    2.650800   -0.907700
H       6.414900    2.653800   -0.642700
C       4.812000    3.731400   -1.598800
H       5.434200    4.577300   -1.870200
C       3.461800    3.713700   -1.951200
H       3.030400    4.543400   -2.500200
C       2.664600    2.621600   -1.608600
H       1.618200    2.602000   -1.894200
H       0.204100    1.366600   -0.790500
C      -0.006500   -1.594300   -2.346800
N      -0.089600   -2.559200   -3.020100
Ni      0.113400    0.021100   -1.377500
C       0.088800   -1.640200    1.580700
F       0.638600   -2.444800    2.622600
F       0.744700   -2.104400    0.425800
92
L1-5 Molecule Name
P      -1.463800   -0.816500   -0.130600
P       2.150500    0.381800   -0.148200
C      -1.338100   -2.687100   -0.124600
C      -2.530100   -3.410000   -0.302000
H      -3.456000   -2.877600   -0.472200
C      -2.567100   -4.802800   -0.264400
H      -3.510700   -5.316900   -0.407500
C      -1.395500   -5.516500   -0.046500
H      -1.402700   -6.600100   -0.020300
C      -0.199800   -4.826600    0.132300
H       0.718400   -5.373600    0.291900
C      -0.154200   -3.429200    0.100400
C       1.372100   -1.865300    1.479400
C       1.925700   -0.567000    1.439900
C       2.160200    0.069300    2.670500
H       2.607500    1.053800    2.684200
C       1.824800   -0.523300    3.885500
H       2.013400    0.009300    4.810900
C       1.247300   -1.788800    3.905800
H       0.966500   -2.255900    4.842300
C       1.042700   -2.454800    2.704400
H       0.614100   -3.451400    2.708100
C      -1.826100   -0.464700    1.646700
C      -1.822300    0.874600    2.067600
H      -1.583900    1.661400    1.360700
C      -2.131400    1.207200    3.385000
H      -2.132300    2.250100    3.682500
C      -2.436900    0.204900    4.307600
H      -2.667200    0.460800    5.336200
C      -2.447400   -1.128800    3.898900
H      -2.686700   -1.913800    4.608400
C      -2.152800   -1.462000    2.575600
H      -2.170500   -2.502900    2.274100
C      -3.116000   -0.592200   -0.915000
C      -4.264800   -0.250400   -0.188500
H      -4.208300   -0.109400    0.884400
C      -5.485300   -0.072700   -0.843200
H      -6.366500    0.198100   -0.271300
C      -5.571900   -0.243800   -2.225400
H      -6.520600   -0.105400   -2.732600
C      -4.433000   -0.598600   -2.953500
H      -4.492100   -0.736600   -4.027300
C      -3.209500   -0.768500   -2.305900
H      -2.323800   -1.027000   -2.879400
C       3.660600   -0.331900   -0.904800
C       4.753600   -0.734800   -0.123300
H       4.708600   -0.645700    0.957700
C       5.895400   -1.254000   -0.730900
H       6.735300   -1.569700   -0.121400
C       5.952500   -1.373900   -2.121900
H       6.839300   -1.783200   -2.593900
C       4.864100   -0.981700   -2.902000
H       4.896800   -1.093300   -3.979900
C       3.717100   -0.464500   -2.297500
H       2.852500   -0.206400   -2.900100
C       2.752000    2.037700    0.420100
C       3.995900    2.550400    0.025200
H       4.671500    1.942100   -0.563700
C       4.376200    3.849100    0.376100
H       5.339600    4.228300    0.053200
C       3.526900    4.652500    1.134000
H       3.824700    5.659400    1.405600
C       2.284000    4.154400    1.534400
H       1.611200    4.771400    2.121000
C       1.896900    2.866900    1.171300
H       0.917400    2.501600    1.464000
H      -0.004500    1.149600    0.186800
C       0.219300   -0.433500   -2.774100
N       0.237000   -0.939900   -3.839200
Ni      0.108600    0.475900   -1.106500
C       1.205000   -2.784100    0.290500
F       1.576100   -2.162600   -0.910800
F       2.179200   -3.809800    0.458800
C      -0.972200    2.556000   -2.102500
C       0.391600    2.554700   -2.066700
H       0.951600    2.998600   -1.253200
H       0.958400    2.273500   -2.946800
C      -1.791900    3.124200   -0.988500
C      -1.229700    3.985200   -0.028300
C      -3.155600    2.815300   -0.872700
C      -1.988800    4.474300    1.032000
H      -0.191000    4.281600   -0.114000
C      -3.916400    3.301400    0.191000
H      -3.629500    2.169800   -1.601700
C      -3.337400    4.126800    1.153500
H      -1.530900    5.139200    1.757500
H      -4.962800    3.025900    0.265100
H      -3.929000    4.505500    1.979900
C      -1.692700    2.170800   -3.374200
H      -2.161900    3.060500   -3.813400
H      -0.997200    1.738000   -4.094600
H      -2.478800    1.433900   -3.202000
92
L1-6 Molecule Name
P      -1.734500   -0.370000   -0.204900
P       1.787600   -0.226700    0.002600
C      -2.290600   -2.125600   -0.494700
C      -3.667200   -2.385800   -0.576300
H      -4.369600   -1.568600   -0.479000
C      -4.161900   -3.672300   -0.787000
H      -5.232400   -3.831300   -0.847800
C      -3.279600   -4.737100   -0.924600
H      -3.648100   -5.741400   -1.099000
C      -1.908200   -4.506200   -0.846400
H      -1.216200   -5.328400   -0.966700
C      -1.404600   -3.220400   -0.631200
C       0.649200   -2.743600    0.843400
C       1.414800   -1.610900    1.198800
C       1.898900   -1.547600    2.516600
H       2.513600   -0.710800    2.817900
C       1.621200   -2.535200    3.457300
H       2.011500   -2.439500    4.464100
C       0.851100   -3.636800    3.098100
H       0.625200   -4.414600    3.818100
C       0.381100   -3.735100    1.795100
H      -0.207600   -4.598300    1.504000
C      -1.594400   -0.290700    1.628000
C      -1.173000    0.938400    2.155200
H      -0.913200    1.752800    1.485600
C      -1.103100    1.129100    3.534200
H      -0.795000    2.094400    3.922900
C      -1.419900    0.081200    4.401400
H      -1.352900    0.223100    5.474600
C      -1.828500   -1.148100    3.882000
H      -2.075300   -1.965800    4.550400
C      -1.931900   -1.330100    2.501600
H      -2.270300   -2.282400    2.109300
C      -3.304500    0.581600   -0.451500
C      -4.099800    0.996700    0.629300
H      -3.812100    0.762100    1.646200
C      -5.269400    1.726000    0.411200
H      -5.867600    2.042200    1.259000
C      -5.665100    2.048400   -0.887200
H      -6.571600    2.619800   -1.055400
C      -4.890400    1.624900   -1.968100
H      -5.186800    1.864300   -2.983100
C      -3.721500    0.894000   -1.755700
H      -3.128300    0.589700   -2.608200
C       3.133000   -1.010000   -0.986100
C       4.237400   -1.583200   -0.335200
H       4.304800   -1.553300    0.747900
C       5.252400   -2.191000   -1.070800
H       6.101100   -2.630900   -0.558700
C       5.171400   -2.237900   -2.464900
H       5.959600   -2.714100   -3.038000
C       4.072300   -1.680000   -3.117000
H       3.997000   -1.725000   -4.197600
C       3.054400   -1.069400   -2.382300
H       2.190600   -0.657500   -2.889400
C       2.718100    1.028100    0.989400
C       3.918000    1.567200    0.496600
H       4.368500    1.161700   -0.401300
C       4.541400    2.632800    1.148300
H       5.460600    3.041000    0.743200
C       3.989900    3.166600    2.313000
H       4.478400    3.991000    2.820400
C       2.802900    2.633500    2.817300
H       2.360000    3.041500    3.719600
C       2.165800    1.587800    2.152200
H       1.229600    1.209900    2.540400
C       0.752100    3.181900   -2.190200
C       1.419100    1.794500   -2.109800
H       0.014000    3.141600   -2.998100
H       2.326000    1.870300   -1.496400
H       1.714200    1.473000   -3.113200
C      -0.754600    0.674800   -2.957700
N      -1.244300    0.698800   -4.030700
Ni      0.132500    0.521300   -1.320400
C       0.101100   -3.070100   -0.534100
F       0.530300   -2.143600   -1.507600
F       0.711200   -4.285700   -0.934100
C      -0.002700    3.555000   -0.920500
C       0.666700    3.914400    0.258400
C      -1.405600    3.569700   -0.917600
C      -0.045300    4.307100    1.393600
H       1.751900    3.891300    0.292000
C      -2.121800    3.955400    0.216800
H      -1.936900    3.269100   -1.815100
C      -1.442500    4.337800    1.375400
H       0.494800    4.591300    2.291400
H      -3.206300    3.949400    0.191800
H      -1.994800    4.647800    2.256500
C       1.795700    4.255900   -2.561200
H       2.592200    4.312600   -1.809500
H       2.259700    4.009900   -3.522400
H       1.330700    5.244900   -2.642800
92
L1-7 Molecule Name
P       0.820700   -1.648500   -0.344000
P       0.128600    1.787100   -0.075500
C       2.629600   -1.924600   -0.713300
C       3.097100   -3.239700   -0.861100
H       2.402100   -4.062400   -0.751000
C       4.430800   -3.522100   -1.153500
H       4.750700   -4.552700   -1.259700
C       5.336700   -2.480000   -1.310400
H       6.376500   -2.680100   -1.542600
C       4.898600   -1.164300   -1.176000
H       5.597900   -0.350800   -1.310700
C       3.563500   -0.871200   -0.881200
C       2.820000    1.041100    0.665500
C       1.581000    1.580500    1.075600
C       1.426400    1.883200    2.439600
H       0.477000    2.262500    2.793400
C       2.455300    1.700300    3.358800
H       2.288600    1.936800    4.403500
C       3.686400    1.210200    2.932700
H       4.500700    1.071800    3.634600
C       3.856300    0.880300    1.594500
H       4.806200    0.477800    1.259700
C       0.788400   -1.595400    1.500000
C      -0.460600   -1.318400    2.079600
H      -1.325900   -1.179600    1.439600
C      -0.601200   -1.237700    3.461800
H      -1.574400   -1.020100    3.888600
C       0.509700   -1.432100    4.287400
H       0.406400   -1.360400    5.364900
C       1.751700   -1.718000    3.720900
H       2.618000   -1.867500    4.356500
C       1.891600   -1.805600    2.333200
H       2.864000   -2.020100    1.903400
C       0.078400   -3.316400   -0.627200
C       0.049100   -4.319300    0.355900
H       0.504600   -4.142400    1.324300
C      -0.574300   -5.541300    0.101700
H      -0.593000   -6.306400    0.870600
C      -1.176500   -5.775800   -1.136900
H      -1.666800   -6.723800   -1.331500
C      -1.151400   -4.784300   -2.118900
H      -1.626900   -4.955400   -3.078600
C      -0.530500   -3.559000   -1.868100
H      -0.565400   -2.768100   -2.608700
C       0.651000    3.225900   -1.104800
C       1.652700    4.123100   -0.708500
H       2.181100    3.968200    0.226400
C       1.988300    5.209800   -1.517000
H       2.769400    5.893500   -1.202300
C       1.327600    5.411400   -2.729500
H       1.592600    6.253400   -3.359900
C       0.333600    4.518800   -3.134500
H      -0.172800    4.661900   -4.082900
C       0.000600    3.429700   -2.329600
H      -0.750000    2.718500   -2.659100
C      -1.137800    2.575300    1.012900
C      -1.070500    3.914200    1.432700
H      -0.252500    4.544000    1.100600
C      -2.050600    4.443900    2.270800
H      -1.986500    5.479800    2.586100
C      -3.112400    3.643800    2.701100
H      -3.872100    4.055600    3.357000
C      -3.197700    2.318200    2.276400
H      -4.023500    1.692500    2.595200
C      -2.220900    1.789400    1.430400
H      -2.309500    0.768100    1.076000
C      -4.513900    0.085900   -1.894400
C      -3.308700    1.055400   -2.088200
H      -4.493400   -0.612300   -2.740800
H      -3.284400    1.779700   -1.267300
H      -3.450500    1.614200   -3.023100
C      -2.028800    0.300000   -2.144300
N      -1.546200   -0.704400   -2.666900
Ni     -0.417900    0.006200   -1.191300
C       3.194800    0.598900   -0.737900
F       2.213300    0.927200   -1.695700
F       4.312700    1.387800   -1.125200
C      -4.361900   -0.743300   -0.623400
C      -4.851800   -0.302500    0.612300
C      -3.681900   -1.971100   -0.667200
C      -4.654400   -1.056200    1.772700
H      -5.385800    0.639800    0.678400
C      -3.476700   -2.723600    0.488600
H      -3.284200   -2.325800   -1.611300
C      -3.961500   -2.266300    1.716500
H      -5.048000   -0.699100    2.719600
H      -2.931900   -3.660000    0.426500
H      -3.801200   -2.847800    2.618100
C      -5.827000    0.879700   -1.955900
H      -5.841100    1.690800   -1.218900
H      -5.950200    1.333000   -2.945200
H      -6.686600    0.230000   -1.764800
92
L1-8 Molecule Name
P       1.734500    0.370000   -0.205100
P      -1.787400    0.226600    0.002600
C       2.290500    2.125600   -0.495000
C       3.667100    2.385800   -0.576500
H       4.369500    1.568500   -0.479100
C       4.161900    3.672200   -0.787300
H       5.232500    3.831200   -0.848100
C       3.279600    4.737000   -0.925000
H       3.648200    5.741300   -1.099400
C       1.908200    4.506200   -0.846800
H       1.216300    5.328400   -0.967100
C       1.404500    3.220400   -0.631700
C      -0.649300    2.743800    0.842900
C      -1.414600    1.610900    1.198600
C      -1.898400    1.547700    2.516500
H      -2.512800    0.710700    2.818000
C      -1.620900    2.535600    3.456900
H      -2.011100    2.439900    4.463800
C      -0.851300    3.637400    3.097500
H      -0.625600    4.415500    3.817300
C      -0.381400    3.735700    1.794500
H       0.206900    4.598900    1.503100
C       1.594400    0.291000    1.627800
C       1.173700   -0.938200    2.155300
H       0.914400   -1.753000    1.485900
C       1.103800   -1.128600    3.534300
H       0.796200   -2.094000    3.923200
C       1.419800   -0.080300    4.401300
H       1.352700   -0.222000    5.474500
C       1.827700    1.149100    3.881600
H       2.073900    1.967200    4.549800
C       1.931200    1.330800    2.501200
H       2.269100    2.283200    2.108700
C       3.304500   -0.581500   -0.451400
C       4.100000   -0.995900    0.629500
H       3.812600   -0.760600    1.646300
C       5.269700   -1.725200    0.411600
H       5.868100   -2.040800    1.259600
C       5.665200   -2.048400   -0.886600
H       6.571700   -2.619800   -1.054700
C       4.890300   -1.625700   -1.967600
H       5.186500   -1.865700   -2.982500
C       3.721300   -0.894800   -1.755500
H       3.127900   -0.591100   -2.608100
C      -3.132900    1.009900   -0.985900
C      -4.237200    1.583100   -0.334900
H      -4.304500    1.553100    0.748300
C      -5.252200    2.191000   -1.070300
H      -6.100900    2.630900   -0.558100
C      -5.171300    2.238000   -2.464500
H      -5.959600    2.714300   -3.037400
C      -4.072400    1.680100   -3.116700
H      -3.997200    1.725200   -4.197300
C      -3.054400    1.069400   -2.382200
H      -2.190800    0.657500   -2.889300
C      -2.717600   -1.028200    0.989600
C      -3.917700   -1.567200    0.497400
H      -4.368500   -1.161800   -0.400500
C      -4.540900   -2.632700    1.149400
H      -5.460300   -3.041000    0.744700
C      -3.989100   -3.166300    2.314000
H      -4.477600   -3.990700    2.821700
C      -2.801900   -2.633300    2.817800
H      -2.358700   -3.041200    3.719900
C      -2.165000   -1.587700    2.152300
H      -1.228600   -1.210000    2.540000
C      -0.753700   -3.182400   -2.189400
C      -1.419900   -1.794500   -2.109400
H      -0.016300   -3.142900   -2.998000
H      -2.326800   -1.869700   -1.495900
H      -1.714900   -1.473200   -3.112800
C       0.754300   -0.676300   -2.958000
N       1.244000   -0.701200   -4.031100
Ni     -0.132600   -0.521600   -1.320700
C      -0.101100    3.070100   -0.534600
F      -0.530300    2.143500   -1.508000
F      -0.711200    4.285700   -0.934900
C       0.002100   -3.555200   -0.920300
C      -0.666300   -3.914900    0.259100
C       1.405000   -3.569400   -0.918300
C       0.046700   -4.307400    1.393800
H      -1.751500   -3.892300    0.293500
C       2.122200   -3.954900    0.215500
H       1.935500   -3.268500   -1.816200
C       1.443800   -4.337600    1.374600
H      -0.492800   -4.591900    2.291900
H       3.206700   -3.948400    0.189700
H       1.996900   -4.647400    2.255300
C      -1.798400   -4.256000   -2.558900
H      -2.594200   -4.311600   -1.806500
H      -2.263000   -4.010100   -3.519800
H      -1.334100   -5.245200   -2.640300
90
L1-Cplx1 Molecule Name
P      -1.719300   -0.039000    0.148900
P       1.764300    0.072600    0.056400
C      -2.346500   -1.308200   -1.102900
C      -3.721700   -1.604400   -1.114600
H      -4.369500   -1.124000   -0.393200
C      -4.287500   -2.495900   -2.023800
H      -5.353600   -2.691000   -1.990700
C      -3.479900   -3.124400   -2.964800
H      -3.903100   -3.807800   -3.692200
C      -2.109200   -2.883900   -2.954200
H      -1.468500   -3.391600   -3.661800
C      -1.534300   -2.004700   -2.029300
C       0.601800   -2.475400   -0.736700
C       1.382700   -1.759400    0.195300
C       1.803800   -2.462100    1.341400
H       2.373100   -1.945600    2.100500
C       1.503500   -3.803900    1.546800
H       1.842700   -4.294100    2.452300
C       0.769500   -4.505700    0.594600
H       0.536900   -5.555100    0.734000
C       0.322000   -3.835200   -0.533700
H      -0.267500   -4.367100   -1.272300
C      -1.588100   -1.107500    1.658800
C      -1.008600   -0.517700    2.793300
H      -0.704800    0.521400    2.739600
C      -0.812300   -1.245900    3.964100
H      -0.355800   -0.770300    4.825600
C      -1.185700   -2.590400    4.015900
H      -1.023400   -3.166700    4.920400
C      -1.763500   -3.188700    2.896600
H      -2.048800   -4.234900    2.926700
C      -1.969200   -2.453200    1.727400
H      -2.408100   -2.940000    0.864700
C      -3.307400    0.869500    0.458400
C      -3.772100    1.135500    1.753100
H      -3.274400    0.698600    2.610900
C      -4.880200    1.962100    1.958100
H      -5.220000    2.158100    2.969500
C      -5.549600    2.526700    0.873500
H      -6.409100    3.168100    1.034500
C      -5.106600    2.255500   -0.423600
H      -5.620000    2.685600   -1.276900
C      -3.995300    1.441700   -0.627200
H      -3.660600    1.247400   -1.640500
C       3.125500    0.105500   -1.202800
C       3.372200   -0.907900   -2.136600
H       2.781400   -1.815200   -2.136300
C       4.383900   -0.765500   -3.089500
H       4.554100   -1.559600   -3.808500
C       5.170200    0.385400   -3.118600
H       5.953800    0.492900   -3.860700
C       4.944200    1.397000   -2.182400
H       5.554100    2.294200   -2.189100
C       3.931100    1.257300   -1.236200
H       3.771100    2.042300   -0.503000
C       2.805200    0.301200    1.582000
C       4.146100   -0.113500    1.666400
H       4.621900   -0.571400    0.806400
C       4.870700    0.050400    2.846200
H       5.904300   -0.275700    2.891800
C       4.269400    0.629500    3.966600
H       4.834600    0.757700    4.883500
C       2.939900    1.044500    3.898400
H       2.465100    1.500400    4.760700
C       2.218800    0.882200    2.714100
H       1.189800    1.212500    2.659200
Ni     -0.019600    1.372800   -0.155300
C      -0.019200   -1.928400   -2.006600
F       0.500700   -2.705600   -3.084900
F       0.406200   -0.627300   -2.316400
C       0.437800    2.373400   -2.107300
C      -0.919300    2.435600   -1.912600
C      -1.635200    3.683200   -1.420900
C      -1.740200    3.820500    0.126300
C      -0.676500    3.065900    0.901500
C       0.688000    3.193500    0.646100
C       1.236900    4.140500   -0.413700
C       1.388600    3.515400   -1.824700
H       1.262300    4.302600   -2.585500
H       2.406500    3.137800   -1.948000
H       0.586200    5.023300   -0.470200
H       2.216300    4.512000   -0.086800
H      -1.120500    4.562400   -1.830200
H      -2.647800    3.704000   -1.840600
H      -1.704400    4.890500    0.389500
H      -2.719200    3.461800    0.451400
H       1.388200    2.930900    1.433100
H      -0.990600    2.715200    1.885600
H       0.845400    1.550200   -2.685000
H      -1.528800    1.655100   -2.362600
95
L1-LAN-1 Molecule Name
P      -1.826500    0.676000   -0.173600
P       0.985100   -1.468300    0.140500
C      -3.145100   -0.262800   -1.125000
C      -4.383000    0.377800   -1.306100
H      -4.532400    1.370400   -0.902500
C      -5.435400   -0.222100   -1.995800
H      -6.373800    0.308900   -2.108400
C      -5.270500   -1.491000   -2.537800
H      -6.073200   -1.966400   -3.089400
C      -4.058800   -2.154400   -2.364900
H      -3.920900   -3.142400   -2.782400
C      -3.004800   -1.565000   -1.661000
C      -1.525300   -2.843300   -0.029500
C      -0.403000   -2.528000    0.762300
C      -0.391900   -2.982700    2.091900
H       0.442700   -2.726100    2.731200
C      -1.428700   -3.751700    2.612600
H      -1.386000   -4.080000    3.644800
C      -2.511900   -4.093500    1.806700
H      -3.320200   -4.702600    2.194800
C      -2.555700   -3.632700    0.496800
H      -3.406400   -3.879600   -0.129000
C      -2.192700    0.234400    1.574600
C      -1.287400    0.697900    2.543500
H      -0.449300    1.316800    2.238900
C      -1.458200    0.373600    3.886800
H      -0.746500    0.732600    4.621700
C      -2.537000   -0.422800    4.278500
H      -2.667700   -0.684500    5.322800
C      -3.445300   -0.880100    3.324100
H      -4.282400   -1.501300    3.623400
C      -3.278700   -0.550500    1.977500
H      -3.986000   -0.920000    1.244100
C      -2.487100    2.389900   -0.316200
C      -3.143400    3.052900    0.728400
H      -3.315200    2.546800    1.671500
C      -3.566600    4.374700    0.566400
H      -4.059700    4.884000    1.387000
C      -3.355200    5.036200   -0.642700
H      -3.680500    6.063300   -0.765700
C      -2.718100    4.373700   -1.695900
H      -2.550600    4.883400   -2.638300
C      -2.279700    3.062300   -1.530600
H      -1.757900    2.559500   -2.339800
C       1.846600   -2.574900   -1.040900
C       1.834800   -3.971700   -0.922300
H       1.270400   -4.446600   -0.125700
C       2.535500   -4.759200   -1.836200
H       2.520100   -5.839300   -1.738300
C       3.248700   -4.159400   -2.875800
H       3.795100   -4.773400   -3.583400
C       3.249800   -2.770000   -3.009000
H       3.792400   -2.296100   -3.819200
C       2.544600   -1.982000   -2.100700
H       2.526000   -0.905000   -2.221100
C       2.138000   -1.387200    1.571200
C       2.963400   -2.454400    1.957200
H       2.940000   -3.386900    1.404500
C       3.838500   -2.316100    3.032900
H       4.481300   -3.143200    3.313100
C       3.903100   -1.110700    3.736000
H       4.595900   -1.001700    4.563200
C       3.095200   -0.039900    3.354400
H       3.163900    0.910200    3.872100
C       2.223200   -0.178100    2.274800
H       1.637600    0.671800    1.945600
C       0.400100    4.402200    0.399700
C       0.935900    3.792900   -0.919100
H      -0.593800    3.978800    0.586600
H       1.918900    4.225100   -1.146400
H       0.245100    4.043200   -1.730600
C       0.254600    5.920700    0.233600
H      -0.172000    6.368300    1.137900
H       1.232000    6.384100    0.052900
H      -0.404800    6.163400   -0.607300
C       1.309300    4.061000    1.588700
H       0.924300    4.516400    2.508100
H       1.373700    2.977800    1.744400
H       2.329200    4.420500    1.415000
C       1.080200    2.314900   -0.833200
N       2.026500    1.505900   -0.814900
Ni      0.372600    0.593600   -0.514000
Al      3.988200    1.442100   -1.138500
Cl      4.544700    3.486300   -0.347600
C       4.865600    0.023300   -0.077800
H       4.733700    0.174800    0.999300
H       4.496400   -0.979300   -0.326900
H       5.944900    0.039000   -0.283300
C       4.090900    1.443200   -3.123800
H       3.514700    2.282200   -3.535600
H       5.129200    1.559600   -3.460700
H       3.699000    0.518700   -3.570400
C      -1.756500   -2.401100   -1.461700
F      -1.848800   -3.572300   -2.254200
F      -0.657700   -1.705100   -2.009100
95
L1-LAN-2 Molecule Name
P      -1.099200   -1.375000   -0.081700
P       2.109000    0.707500    0.080100
C      -1.988600   -0.910900   -1.654400
C      -3.302500   -1.356200   -1.864800
H      -3.791800   -1.951300   -1.103700
C      -4.006400   -1.034200   -3.025100
H      -5.023200   -1.388200   -3.150600
C      -3.405500   -0.251800   -4.004900
H      -3.947100    0.018500   -4.903700
C      -2.103000    0.204700   -3.817900
H      -1.636900    0.831400   -4.565400
C      -1.393700   -0.116900   -2.659600
C       1.127400   -0.544500   -2.329200
C       2.178100   -0.432300   -1.390400
C       3.240500   -1.344700   -1.498400
H       4.075900   -1.276000   -0.815000
C       3.249800   -2.357100   -2.455800
H       4.083700   -3.048600   -2.494900
C       2.185400   -2.485300   -3.341500
H       2.166000   -3.282900   -4.074100
C       1.143600   -1.567200   -3.282500
H       0.318100   -1.643100   -3.981800
C      -0.357600   -3.002600   -0.535700
C       0.832400   -3.362000    0.111000
H       1.267500   -2.677300    0.831800
C       1.467300   -4.571000   -0.173500
H       2.390300   -4.830000    0.333900
C       0.920100   -5.434900   -1.121700
H       1.412300   -6.373900   -1.350800
C      -0.263200   -5.086600   -1.778000
H      -0.691000   -5.756100   -2.516600
C      -0.899500   -3.880400   -1.486800
H      -1.815100   -3.616100   -2.005000
C      -2.520100   -1.838000    0.989600
C      -2.751100   -3.139600    1.455800
H      -2.112500   -3.955600    1.134000
C      -3.806600   -3.393300    2.336500
H      -3.974100   -4.403600    2.694600
C      -4.644000   -2.356000    2.748500
H      -5.463000   -2.557300    3.430300
C      -4.426100   -1.056600    2.280900
H      -5.064400   -0.234000    2.583400
C      -3.367100   -0.798100    1.414000
H      -3.210900    0.220600    1.073300
C       2.386200    2.386400   -0.591900
C       3.060400    2.591700   -1.803300
H       3.416700    1.743300   -2.377900
C       3.257200    3.885900   -2.283300
H       3.768400    4.037300   -3.227500
C       2.785300    4.981500   -1.557300
H       2.930200    5.986600   -1.937700
C       2.115700    4.781800   -0.349200
H       1.732900    5.628000    0.209800
C       1.914000    3.488500    0.132600
H       1.367800    3.336200    1.056800
C       3.703700    0.367200    0.958100
C       4.734700    1.314600    1.026900
H       4.633600    2.264400    0.515700
C       5.896500    1.049900    1.757000
H       6.679100    1.798900    1.803400
C       6.052400   -0.167000    2.418000
H       6.956500   -0.370800    2.980800
C       5.036200   -1.123600    2.351600
H       5.148100   -2.075000    2.860300
C       3.871900   -0.852700    1.637600
H       3.091300   -1.606500    1.597700
C       0.654300   -0.842100    3.364600
C      -0.497800    0.085600    3.227600
H      -0.476100    0.993300    3.827100
H      -1.489600   -0.352600    3.136800
C       0.280700   -2.316600    3.571000
H       1.154400   -2.968400    3.456600
H      -0.115600   -2.449600    4.582900
H      -0.488800   -2.633100    2.862400
C       1.749600   -0.357100    4.323000
H       2.650400   -0.973500    4.247200
H       2.027300    0.678500    4.105900
H       1.379100   -0.411000    5.352200
C      -0.799500    1.756200    1.226100
N      -1.635100    2.544300    0.989700
Ni      0.342400    0.349700    1.510200
Al     -3.233800    3.504900    0.350100
Cl     -4.753300    2.660000    1.792600
C      -2.899900    5.429900    0.660400
H      -2.692100    5.623300    1.720200
H      -2.035900    5.773800    0.075100
H      -3.763900    6.043200    0.374500
C      -3.504000    2.734500   -1.457200
H      -3.677200    1.651900   -1.394000
H      -4.366900    3.178300   -1.969900
H      -2.615000    2.895800   -2.081300
C      -0.001700    0.447500   -2.496700
F       0.327000    1.232600   -3.633000
F      -0.024900    1.375300   -1.434200
H       1.206700   -0.873500    2.301600
95
L1-LAN-3 Molecule Name
P       1.107800   -1.400000   -0.272000
P      -2.140100    0.557500    0.019600
C       1.985600   -1.133500    1.348800
C       3.343700   -1.483200    1.423000
H       3.842100   -1.868200    0.543100
C       4.079300   -1.341000    2.598400
H       5.128600   -1.611800    2.609900
C       3.464000   -0.837700    3.736900
H       4.023200   -0.702300    4.654900
C       2.117100   -0.489000    3.690800
H       1.639000   -0.088300    4.572900
C       1.366200   -0.634200    2.520000
C      -1.168500   -1.140000    2.147200
C      -2.220600   -0.843400    1.249300
C      -3.276200   -1.767000    1.171000
H      -4.120800   -1.557800    0.528900
C      -3.268400   -2.962800    1.886100
H      -4.099600   -3.651600    1.786000
C      -2.190900   -3.273300    2.709000
H      -2.154100   -4.214100    3.244700
C      -1.163400   -2.349000    2.850200
H      -0.337700   -2.560600    3.521000
C       0.423000   -3.100500   -0.045300
C      -0.708400   -3.497400   -0.768400
H      -1.179500   -2.792800   -1.443600
C      -1.232400   -4.782800   -0.626000
H      -2.113000   -5.069700   -1.190200
C      -0.630900   -5.689900    0.245600
H      -1.041000   -6.687100    0.362800
C       0.503000   -5.308600    0.965800
H       0.980600   -6.010300    1.641000
C       1.028800   -4.026000    0.820000
H       1.908500   -3.744100    1.387400
C       2.489500   -1.660100   -1.454700
C       2.634000   -2.847600   -2.184200
H       1.967700   -3.684200   -2.006000
C       3.641100   -2.960800   -3.146400
H       3.743600   -3.884100   -3.706500
C       4.513500   -1.897900   -3.380700
H       5.294800   -1.990400   -4.127200
C       4.378500   -0.712500   -2.652300
H       5.044700    0.127000   -2.815900
C       3.369400   -0.591000   -1.700900
H       3.280900    0.343600   -1.156100
C      -2.546900    2.073800    0.965300
C      -3.500600    2.057200    1.993200
H      -3.997900    1.129400    2.258100
C      -3.806400    3.229500    2.682500
H      -4.540400    3.209500    3.480500
C      -3.163500    4.424800    2.350800
H      -3.398100    5.334800    2.891900
C      -2.210300    4.445100    1.332200
H      -1.694700    5.365900    1.083800
C      -1.900300    3.272400    0.642400
H      -1.130900    3.283100   -0.121100
C      -3.657500    0.338900   -1.013900
C      -4.601100    1.366500   -1.155900
H      -4.503500    2.279700   -0.581500
C      -5.671500    1.232900   -2.045300
H      -6.385000    2.043200   -2.146100
C      -5.825900    0.067300   -2.792800
H      -6.657800   -0.034700   -3.480800
C      -4.896600   -0.967300   -2.655200
H      -5.003400   -1.877000   -3.236000
C      -3.819400   -0.825600   -1.786200
H      -3.087300   -1.622200   -1.714200
H      -1.026700   -0.853700   -1.576900
C       0.913600    1.639400   -0.477400
N       1.721000    2.421900   -0.144500
Ni     -0.218000    0.269400   -1.114200
Al      3.314400    3.451900    0.372500
Cl      4.629200    2.869300   -1.375100
C       2.787200    5.356600    0.289400
H       2.348300    5.595400   -0.687700
H       2.041700    5.587900    1.062800
H       3.643900    6.025500    0.439300
C       3.912200    2.556500    2.034100
H       4.100100    1.492400    1.841900
H       4.835600    2.992000    2.435900
H       3.137900    2.623800    2.810400
C      -0.082000   -0.181200    2.581400
F      -0.397000    0.136200    3.934600
F      -0.198900    1.056600    1.923500
C      -0.549700    1.238100   -3.307900
C       0.599300    0.506200   -3.187400
H       1.548100    0.983300   -2.965100
H       0.644500   -0.523400   -3.530300
C      -1.788900    0.663400   -3.951200
H      -2.698700    1.015500   -3.459000
H      -1.832700    0.997500   -4.996900
H      -1.787300   -0.428900   -3.936200
C      -0.577200    2.736100   -3.109500
H      -1.432700    3.031900   -2.491800
H       0.337800    3.110700   -2.647100
H      -0.697300    3.227700   -4.084200
83
L1-LAN-4 Molecule Name
P       1.216300   -1.359000   -0.374900
P      -2.283400    0.577000   -0.487200
C       1.909000   -0.788300    1.256300
C       3.288200   -0.964100    1.450600
H       3.891500   -1.368200    0.647900
C       3.915000   -0.623200    2.648000
H       4.984200   -0.763900    2.752800
C       3.162500   -0.094000    3.687400
H       3.631900    0.189600    4.621800
C       1.794100    0.097500    3.516300
H       1.215300    0.532400    4.318000
C       1.148200   -0.238900    2.321700
C      -1.350000   -0.911300    1.821100
C      -2.366500   -0.720300    0.853700
C      -3.342600   -1.722600    0.731600
H      -4.128800   -1.612000   -0.004700
C      -3.315000   -2.875700    1.513500
H      -4.085700   -3.627400    1.385700
C      -2.292300   -3.066200    2.437700
H      -2.242600   -3.971200    3.030800
C      -1.327400   -2.078100    2.592200
H      -0.535700   -2.207200    3.322500
C       0.646900   -3.062600    0.045000
C      -0.421700   -3.650000   -0.643100
H      -0.941200   -3.088300   -1.411200
C      -0.840500   -4.944600   -0.332700
H      -1.674000   -5.381500   -0.871200
C      -0.198800   -5.666500    0.673000
H      -0.528300   -6.670400    0.917900
C       0.872100   -5.092700    1.361200
H       1.379800   -5.649100    2.141500
C       1.295700   -3.802600    1.047500
H       2.128200   -3.370100    1.590500
C       2.683800   -1.626000   -1.439300
C       3.082900   -2.903100   -1.859600
H       2.538900   -3.783300   -1.536400
C       4.188200   -3.046200   -2.700700
H       4.488100   -4.036600   -3.025700
C       4.906700   -1.924100   -3.115800
H       5.768600   -2.041100   -3.763600
C       4.516500   -0.650200   -2.695800
H       5.066400    0.234200   -2.995800
C       3.404300   -0.498700   -1.871000
H       3.125700    0.501400   -1.558300
C      -2.753600    2.171900    0.267500
C      -3.550100    2.240200    1.418700
H      -3.891100    1.328400    1.899300
C      -3.880500    3.479800    1.965200
[truncated: 216,415 more chars]
